# Supplementary material for: Engineering multifunctional rhizosphere probiotics using consortia of Bacillus amyloliquefaciens transposon insertion mutants
Source: eLife. 2023 Sep 14;12:e90726. doi: 10.7554/eLife.90726 (PMC10519709; doi:10.7554/eLife.90726)
Supplement: Source data 1. [file elife-90726-data1.xlsx]

## Sheet: Summary
Data file	Figure&Table	Legend
Source Data 1	Table 1	ANOVA table summarizing the effects of mutant traits measured in vitro on the root colonization and plant protection.
Dataset S2, Source Data 1	Figure 1	The effects of transposon insertions on the traits of 479 B. amyloliquefaciens T-5 mutants measured in vitro and in vivo.
Source Data 1	Figure 2	Regression analysis explaining root colonization and plant protection of 47 B. amyloliquefaciens T-5 mutants based on their trait values measured in vitro at different sampling time points.
Source Data 3, Source Data 4	Figure 3	The relationships between predicted and observed consortia performance measured in vitro and correlations between plant performance, consortia richness and consortia average performance measured in vivo.
Source Data 5, Source Data 6	Figure 4	Optimized and randomly assembled 8-mutant consortia show contrasting effects on root colonization and plant performance.
Source Data 2	Table S3	Comparison of trait values of eight mutants used for the assembly of consortia richness gradient relative to the wild-type strain based on students’ t-test.
Dataset S2	Table S4	Comparison of in vitro traits between mutants belonging to three clusters using unpaired two-samples Wilcoxon test.
Source Data 1	Table S5	Comparison of root colonization and plant protection between mutants belonging to three clusters using unpaired two-samples Wilcoxon test.
Source Data 6	Table S6	P-values for comparing the biomass production of each mutant strain on its own (diagonal) or other strains’ supernatant based on student’s t-test.
Source Data 4	Table S7	Comparison of mutant identity effects on consortia root colonization and plant protection based on the absence and presence of each mutant in consortia.
Source Data 4	Table S8	Comparison of the mutant identity effects and consortia richness on root colonization and plant protection.
Source Data 8	Figure S1	Positive and linear relationships between optical density (OD600 nm) and cell counts (CFUs) of wild-type (black), M78 (representative mutant with decreased biomass production, red) and M109 (representative mutant with increased biomass production, blue) strains.
Dataset S2	Figure S2	Optimal number of K-means clusters suggested by gap statistic method.
Dataset S3	Figure S3B	The distribution of disrupted gene functions of mutants classified by each cluster based on the annotated reference genome of the B. amyloliquefaciens T-5.
Source Data 2	Figure S4	Phenotypic characteristics of the eight B. amyloliquefaciens mutants used for assembly of consortia richness gradient.
Dataset S1	Figure S5	The effects of transposon insertions on the traits of 1999 mutants included in the original library measured in vitro.
Source Data 7	Figure S6	Pairwise interactions between eight mutants used in diversity-ecosystem functioning experiment based on supernatant culture assays (A) and agar overlay spot assays (B).
Source Data 2	Figure S7	The performance of single mutants and mutant consortia relative to wild-type strain regarding four traits measured in vitro and root colonization and plant protection measured in vivo.
Source Data 4	Figure S8	The relationship between B. amyloliquefaciens mutant consortia richness and measured consortia trait performance in vitro.
Source Data 4	Figure S9	Analysis of mutant identity effects on consortia performance in vivo.

## Sheet: Source Data 1
Source Data 1. The root colonization and plant protection of 47 B. amyloliquefaciens T-5 mutants at different sampling time points.
sample	Code	Cluster	Swarming motility	Biomass production	Biofilm formation	Pathogen suppression	Average performance	Time	Colonization	Disease incidence
1	WT	1	0.526042	0.523017	0.718028	0.694915	0.69895	5	7.7556	0
2	M1	1	0.604167	0.545219	0.628074	0.81356	0.750897	5	7.294	0
4	M3	1	0.489583	0.442172	0.629927	0.805085	0.660604	5	7.8975	0
6	M5	1	0.03125	0.623952	0.691215	0.855932	0.594403	5	6.5868	0
12	M11	3	0.0208333	0.713183	0.745212	0.686441	0.579634	5	6.8568	0
13	M12	1	0.5	0.684766	0.492648	0.81356	0.710615	5	7.2143	0
14	M13	1	0.484375	0.398612	0.51699	0.830509	0.605732	5	6.901	0
16	M15	2	0.5	0.316742	0	0.830509	0.370897	5	7.3141	0
22	M21	3	0.03125	0.865219	0	0	0.0686012	5	6.959	0
23	M22	3	0.0677083	0.336229	0.538366	0.228814	0.179186	5	6.7414	0
29	M28	3	0.361111	0.578582	0.703447	0.338983	0.505731	5	7.3139	0
30	M29	3	0.03125	0.292368	0.782775	0.262712	0.258904	5	7.0901	0
38	M37	2	0.401042	0.629261	0.641666	0.305085	0.503689	5	7.0369	0
39	M38	1	0.53125	0.553363	0.740269	0.779661	0.756343	5	7.4886	0
46	M45	3	0	0.466425	0.862103	0	0.242566	5	7.1376	0
49	M48	1	0.552083	0.52181	0.714074	0.932204	0.802899	5	7.6399	0
52	M51	1	0.53125	0.295445	0.809094	0.847458	0.707504	5	7.0986	0
53	M52	2	0.473958	0.371946	0.758063	0.423729	0.52408	5	7.3074	0
55	M54	1	0.46875	0.552036	0.954158	0.830509	0.837237	5	7.5391	0
58	M57	2	0.453125	0.796983	0.467935	0.5	0.600722	5	7.2528	0
60	M59	2	0.479167	0.761026	0.845422	0.254237	0.649767	5	6.915	0
67	M66	3	0.296875	0.371885	0.719016	0.457627	0.450682	5	7.6206	0
71	M70	1	0.59375	0.485852	0.793649	0.889831	0.820177	5	7.2041	0
72	M71	1	0.0416667	0.472278	0.916718	0.864407	0.631736	5	6.7291	0
75	M74	2	1	0.299487	0.843816	0.59322	0.809484	5	7.6399	0
78	M77	2	0.458333	0.844827	0.714445	0.288136	0.636032	5	6.9098	0
79	M78	1	0.0833333	0.429985	0.831336	0.830509	0.583456	5	7.4249	0
80	M79	1	0.479167	0.329231	0.936118	0.762712	0.717159	5	6.8603	0
81	M80	3	0.364583	0.353002	0.920301	0.20339	0.44902	5	7.1931	0
83	M82	2	0.572917	1	0.0077845	0.745763	0.644377	5	6.901	0
89	M88	1	0.46875	0.422443	0.850365	0.779661	0.722793	5	7.6206	0
101	M100	1	0.46875	0.314691	0.8731	0.974577	0.767043	5	6.9899	0
102	M101	1	0.5	0.35813	0.925491	1	0.828447	5	7.1239	0
109	M108	1	0.697917	0.559759	0.705919	0.847458	0.839492	5	7.3838	0
110	M109	1	0.479167	0.80724	0.853454	0.79661	0.889991	5	7.4281	0
113	M112	1	0.635417	0.439578	0.88002	0.966102	0.883808	5	7.4082	0
117	M116	3	0.0520833	0.829804	0.355122	0	0.205717	5	7.1875	0
118	M117	3	0.0416667	0.324646	0.836278	0.237288	0.287401	5	6.9234	0
121	M120	1	0.765625	0.358371	0.787841	0.677966	0.750408	5	7.1118	0
123	M122	2	0.96875	0.422443	0.295317	0.762712	0.693804	5	7.2203	0
125	M124	1	0.791667	0.568507	0.84987	0.779661	0.911425	5	7.3054	0
126	M125	1	0.479167	0.328808	0.798962	0.932204	0.730009	5	7.0576	0
133	M132	2	0.947917	0.808205	0.394786	0.898305	0.935385	5	7.2742	0
134	M133	1	0.802083	0.460513	0.786976	0.79661	0.853637	5	7.0199	0
135	M134	2	0.625	0.481388	0.286297	0.79661	0.589147	5	7.164	0
136	M135	1	0.567708	0.45448	0.877672	0.932204	0.847952	5	7.141	0
143	M142	1	0.0625	0	0.91227	0.81356	0.427701	5	7.2158	0
144	M143	1	0.453125	0.56187	1	0.79661	0.839715	5	7.1399	0
145	Pathogen only	-	-	-	-	-	-	5	-	0
1	WT	1	0.526042	0.523017	0.718028	0.694915	0.69895	15	7.0702	11.8126
2	M1	1	0.604167	0.545219	0.628074	0.81356	0.750897	15	6.903	17.7711
4	M3	1	0.489583	0.442172	0.629927	0.805085	0.660604	15	7.1818	12.9461
6	M5	1	0.03125	0.623952	0.691215	0.855932	0.594403	15	7.236	15.878
12	M11	3	0.0208333	0.713183	0.745212	0.686441	0.579634	15	7.3597	17.7711
13	M12	1	0.5	0.684766	0.492648	0.81356	0.710615	15	6.5977	21.1618
14	M13	1	0.484375	0.398612	0.51699	0.830509	0.605732	15	7.0736	19.0126
16	M15	2	0.5	0.316742	0	0.830509	0.370897	15	7.0137	17.2351
22	M21	3	0.03125	0.865219	0	0	0.0686012	15	7.0217	20.0011
23	M22	3	0.0677083	0.336229	0.538366	0.228814	0.179186	15	7.1366	21.9988
29	M28	3	0.361111	0.578582	0.703447	0.338983	0.505731	15	6.9138	20.0011
30	M29	3	0.03125	0.292368	0.782775	0.262712	0.258904	15	7.2168	16.7448
38	M37	2	0.401042	0.629261	0.641666	0.305085	0.503689	15	6.8139	29.2843
39	M38	1	0.53125	0.553363	0.740269	0.779661	0.756343	15	6.8325	18.3604
46	M45	3	0	0.466425	0.862103	0	0.242566	15	7.6587	11.2038
49	M48	1	0.552083	0.52181	0.714074	0.932204	0.802899	15	7.1548	23.1477
52	M51	1	0.53125	0.295445	0.809094	0.847458	0.707504	15	7.3751	15.878
53	M52	2	0.473958	0.371946	0.758063	0.423729	0.52408	15	6.6857	0
55	M54	1	0.46875	0.552036	0.954158	0.830509	0.837237	15	7.4137	0
58	M57	2	0.453125	0.796983	0.467935	0.5	0.600722	15	7.0895	13.9123
60	M59	2	0.479167	0.761026	0.845422	0.254237	0.649767	15	7.5238	15.878
67	M66	3	0.296875	0.371885	0.719016	0.457627	0.450682	15	6.6021	0
71	M70	1	0.59375	0.485852	0.793649	0.889831	0.820177	15	7.1761	0
72	M71	1	0.0416667	0.472278	0.916718	0.864407	0.631736	15	7.3802	0
75	M74	2	1	0.299487	0.843816	0.59322	0.809484	15	7.5084	11.8126
78	M77	2	0.458333	0.844827	0.714445	0.288136	0.636032	15	7.0828	0
79	M78	1	0.0833333	0.429985	0.831336	0.830509	0.583456	15	7.1381	0
80	M79	1	0.479167	0.329231	0.936118	0.762712	0.717159	15	7.118	0
81	M80	3	0.364583	0.353002	0.920301	0.20339	0.44902	15	7.2041	11.4961
83	M82	2	0.572917	1	0.0077845	0.745763	0.644377	15	7.0736	21.1618
89	M88	1	0.46875	0.422443	0.850365	0.779661	0.722793	15	6.6021	11.4961
101	M100	1	0.46875	0.314691	0.8731	0.974577	0.767043	15	7.2762	12.1567
102	M101	1	0.5	0.35813	0.925491	1	0.828447	15	7.1335	22.5513
109	M108	1	0.697917	0.559759	0.705919	0.847458	0.839492	15	7.1399	16.7448
110	M109	1	0.479167	0.80724	0.853454	0.79661	0.889991	15	7.1644	16.7448
113	M112	1	0.635417	0.439578	0.88002	0.966102	0.883808	15	7.4472	19.488
117	M116	3	0.0520833	0.829804	0.355122	0	0.205717	15	7.0645	19.0126
118	M117	3	0.0416667	0.324646	0.836278	0.237288	0.287401	15	7.0785	15.878
121	M120	1	0.765625	0.358371	0.787841	0.677966	0.750408	15	7.4151	21.1618
123	M122	2	0.96875	0.422443	0.295317	0.762712	0.693804	15	7.1046	24.4979
125	M124	1	0.791667	0.568507	0.84987	0.779661	0.911425	15	7.1057	16.7448
126	M125	1	0.479167	0.328808	0.798962	0.932204	0.730009	15	7.0446	21.8235
133	M132	2	0.947917	0.808205	0.394786	0.898305	0.935385	15	7.058	0
134	M133	1	0.802083	0.460513	0.786976	0.79661	0.853637	15	7.0837	13.9123
135	M134	2	0.625	0.481388	0.286297	0.79661	0.589147	15	7.1548	20.5569
136	M135	1	0.567708	0.45448	0.877672	0.932204	0.847952	15	7.2046	17.7711
143	M142	1	0.0625	0	0.91227	0.81356	0.427701	15	6.8995	17.2351
144	M143	1	0.453125	0.56187	1	0.79661	0.839715	15	7.4884	0
145	Pathogen only	-	-	-	-	-	-	15	-	18.57
1	WT	1	0.526042	0.523017	0.718028	0.694915	0.69895	30	6.9223	58.5686
2	M1	1	0.604167	0.545219	0.628074	0.81356	0.750897	30	6.8747	62.6486
4	M3	1	0.489583	0.442172	0.629927	0.805085	0.660604	30	7.1581	69.5631
6	M5	1	0.03125	0.623952	0.691215	0.855932	0.594403	30	6.8808	79.7899
12	M11	3	0.0208333	0.713183	0.745212	0.686441	0.579634	30	6.9021	84.8062
13	M12	1	0.5	0.684766	0.492648	0.81356	0.710615	30	6.4213	63.3052
14	M13	1	0.484375	0.398612	0.51699	0.830509	0.605732	30	6.9138	64.0522
16	M15	2	0.5	0.316742	0	0.830509	0.370897	30	6.8613	82.7113
22	M21	3	0.03125	0.865219	0	0	0.0686012	30	6.5185	81.4827
23	M22	3	0.0677083	0.336229	0.538366	0.228814	0.179186	30	6.617	89.3378
29	M28	3	0.361111	0.578582	0.703447	0.338983	0.505731	30	6.8921	67.3352
30	M29	3	0.03125	0.292368	0.782775	0.262712	0.258904	30	6.9379	79.7899
38	M37	2	0.401042	0.629261	0.641666	0.305085	0.503689	30	6.6027	61.548
39	M38	1	0.53125	0.553363	0.740269	0.779661	0.756343	30	7.0672	69.3981
46	M45	3	0	0.466425	0.862103	0	0.242566	30	7.0882	76.6163
49	M48	1	0.552083	0.52181	0.714074	0.932204	0.802899	30	6.4667	70.6119
52	M51	1	0.53125	0.295445	0.809094	0.847458	0.707504	30	6.9952	61.9892
53	M52	2	0.473958	0.371946	0.758063	0.423729	0.52408	30	6.1127	75.7606
55	M54	1	0.46875	0.552036	0.954158	0.830509	0.837237	30	7.1317	69.2764
58	M57	2	0.453125	0.796983	0.467935	0.5	0.600722	30	5.9287	66.6638
60	M59	2	0.479167	0.761026	0.845422	0.254237	0.649767	30	6.6005	81.0409
67	M66	3	0.296875	0.371885	0.719016	0.457627	0.450682	30	6.4769	81.1726
71	M70	1	0.59375	0.485852	0.793649	0.889831	0.820177	30	7.234	69.2764
72	M71	1	0.0416667	0.472278	0.916718	0.864407	0.631736	30	6.9445	69.7445
75	M74	2	1	0.299487	0.843816	0.59322	0.809484	30	7.0719	57.3203
78	M77	2	0.458333	0.844827	0.714445	0.288136	0.636032	30	6.7324	80.0106
79	M78	1	0.0833333	0.429985	0.831336	0.830509	0.583456	30	6.9447	81.9516
80	M79	1	0.479167	0.329231	0.936118	0.762712	0.717159	30	6.1655	68.7553
81	M80	3	0.364583	0.353002	0.920301	0.20339	0.44902	30	6.7634	74.5883
83	M82	2	0.572917	1	0.0077845	0.745763	0.644377	30	6.415	90.4955
89	M88	1	0.46875	0.422443	0.850365	0.779661	0.722793	30	6.4769	73.2669
101	M100	1	0.46875	0.314691	0.8731	0.974577	0.767043	30	6.9356	52.3599
102	M101	1	0.5	0.35813	0.925491	1	0.828447	30	7.0836	50.413
109	M108	1	0.697917	0.559759	0.705919	0.847458	0.839492	30	7.0843	66.8964
110	M109	1	0.479167	0.80724	0.853454	0.79661	0.889991	30	7.1056	69.6698
113	M112	1	0.635417	0.439578	0.88002	0.966102	0.883808	30	6.7782	63.856
117	M116	3	0.0520833	0.829804	0.355122	0	0.205717	30	5.9031	85.9195
118	M117	3	0.0416667	0.324646	0.836278	0.237288	0.287401	30	6.7598	82.7113
121	M120	1	0.765625	0.358371	0.787841	0.677966	0.750408	30	6.9244	67.7418
123	M122	2	0.96875	0.422443	0.295317	0.762712	0.693804	30	6.6662	69.6698
125	M124	1	0.791667	0.568507	0.84987	0.779661	0.911425	30	7.0972	71.3724
126	M125	1	0.479167	0.328808	0.798962	0.932204	0.730009	30	7.1696	62.6486
133	M132	2	0.947917	0.808205	0.394786	0.898305	0.935385	30	7.0731	70.1674
134	M133	1	0.802083	0.460513	0.786976	0.79661	0.853637	30	6.9244	74.6899
135	M134	2	0.625	0.481388	0.286297	0.79661	0.589147	30	6.4667	77.2897
136	M135	1	0.567708	0.45448	0.877672	0.932204	0.847952	30	6.6961	60.9944
143	M142	1	0.0625	0	0.91227	0.81356	0.427701	30	6.7332	75.5969
144	M143	1	0.453125	0.56187	1	0.79661	0.839715	30	7.0744	63.3052
145	Pathogen only	-	-	-	-	-	-	30	-	90.004

## Sheet: Source Data 2
Source Data 2. The performance of mutant consortia and wild-tpye.
Consortia	Replication	Richness	Swarming motility	Biomass production	Biofilm formation	Pathogen suppression	Colonization	Disease incidence
1	1	1	33	1.3156	1.3137	2.92181	6.38021	71.3724
1	2	1	32	1.2669	1.291	2.94833	6.43136	70.1674
1	3	1	32	1.2151	1.3452	2.92181	6.49136	72.5733
2	1	1	31	1.2653	1.644	2.89444	6.51851	71.1601
2	2	1	27	1.1914	1.5938	2.89444	6.41497	73.2669
2	3	1	29	1.2138	1.6106	2.86615	6.49136	72.2135
3	1	1	20	1.5447	1.279	2.12787	5.30103	89.7445
3	2	1	18	1.5649	1.2006	2.12787	5.60206	90.1832
3	3	1	19	1.5441	1.2298	2.05323	4.9905	89.7445
4	1	1	16	0.8644	1.4823	2.94833	5.8451	79.7899
4	2	1	13	0.8497	1.5118	2.94833	6	76.7537
4	3	1	16	0.8795	1.5012	2.9773	5.8838	79.7899
5	1	1	38	1.2988	1.3184	2.86615	6.4624	67.7418
5	2	1	38	1.2985	1.2644	2.86615	6.50515	66.8964
5	3	1	38	1.2993	1.2919	2.86615	6.3741	67.7418
6	1	1	27	1.6994	1.1915	2.86615	6.14613	70.1674
6	2	1	26	1.674	1.2364	2.8703	6.34242	69.6698
6	3	1	28	1.5855	1.1092	2.86615	6.03975	70.1674
7	1	1	41	1.3096	1.2155	2.80656	6.07918	71.2221
7	2	1	40	1.2918	1.2063	2.80656	6.14613	71.3724
7	3	1	41	1.3276	1.2086	2.77511	6.17609	71.2221
8	1	1	20	1.1714	1.7945	2.86615	5.95424	65.9058
8	2	1	22	1.2036	1.8398	2.86615	5.8451	67.1927
8	3	1	21	1.1397	1.8526	2.86615	5.8988	62.3493
9	1	2	22	1.2092	1.7993	2.92181	6.49136	89.1455
9	2	2	22	1.1994	1.6542	2.94833	6.60206	90.1832
9	3	2	22	1.2347	1.7231	2.94833	6.55718	89.1455
10	1	2	22	1.2627	1.4174	2.54615	6.30103	72.2734
10	2	2	20	1.2214	1.4495	2.54615	6.43136	60.6613
10	3	2	21	1.2424	1.4818	2.54615	6.34242	64.9101
11	1	2	30	1.2175	0.8577	2.92181	6.14613	76.9771
11	2	2	31	1.2195	0.8864	2.92181	5.8451	74.1223
11	3	2	30	1.2037	0.8631	2.92181	6.07918	77.4528
12	1	2	36	1.3086	1.2147	2.9173	6.04139	66.5196
12	2	2	36	1.2573	1.2645	2.9173	5.90309	66.7123
12	3	2	38	1.2683	1.3305	2.9173	5.90309	66.4377
13	1	2	33	1.2047	1.2195	2.86615	6.07918	72.7577
13	2	2	32	1.1492	1.2373	2.83688	5.95424	60.0669
13	3	2	33	1.1619	1.1265	2.86615	5.95424	79.5321
14	1	2	30	1.3144	1.2942	2.07956	6.04139	87.9706
14	2	2	30	1.2368	1.1982	2.07956	5.77815	77.069
14	3	2	32	1.2455	1.0507	2.07956	5.96866	89.7113
15	1	2	35	1.1658	1.1152	2.97405	6.04139	66.7646
15	2	2	38	1.1413	1.1065	2.97405	5.90309	68.8642
15	3	2	37	1.1686	1.0748	2.97405	5.98862	67.8144
16	1	2	22	1.2055	1.4067	2.7356	6	67.5132
16	2	2	20	1.2428	1.3713	2.7356	6.04139	73.2669
16	3	2	21	1.1971	1.3207	2.7356	6.02221	61.6594
17	1	2	28	1.1832	1.0557	2.86615	6.04139	73.1724
17	2	2	30	1.1613	0.9776	2.89444	6.07918	69.7445
17	3	2	29	1.2023	0.9429	2.89444	6.06153	65.9058
18	1	2	25	1.384	1.2315	2.45597	6.20412	70.8168
18	2	2	26	1.3824	1.1741	2.45597	6.07918	67.5132
18	3	2	25	1.2332	1.2033	2.45597	6.14613	65.0432
19	1	2	25	1.1804	1.2438	2.94409	6.41497	76.0388
19	2	2	27	1.1697	1.2535	2.94409	6.39794	65.9058
19	3	2	26	1.145	1.1874	2.94409	6.32222	79.9324
20	1	2	28	1.2016	1.6398	2.94833	6.11394	67.3352
20	2	2	30	1.1518	1.5405	2.9773	6.30103	71.3724
20	3	2	29	1.1316	1.5748	2.94833	6.23753	63.3423
21	1	2	39	1.2303	1.233	2.94833	5.8451	78.5398
21	2	2	38	1.2042	1.2068	2.94833	5.69897	65.9058
21	3	2	39	1.1575	1.2192	2.94833	5.79053	75.123
22	1	2	25	1.2192	1.3157	2.9173	5.77815	78.5398
22	2	2	25	1.1787	1.3725	2.9173	5.90309	78.5398
22	3	2	25	1.1839	1.4732	2.9173	5.85406	78.5393
23	1	2	33	1.1287	1.3845	2.83688	5.30103	75.5969
23	2	2	33	1.1415	1.3358	2.83688	5.69897	72.2734
23	3	2	33	1.1638	1.2459	2.83688	5.6323	77.9369
24	1	2	33	1.1885	1.6018	2.97005	6	67.1927
24	2	2	33	1.1675	1.6067	2.97005	5.90309	66.6638
24	3	2	33	1.1913	1.9121	2.97005	5.95951	67.9343
25	1	4	28	1.123	1.2925	2.99074	5.8451	68.4719
25	2	4	29	1.0281	1.3557	2.99074	5.95424	73.5314
25	3	4	28	1.1656	1.4193	2.99074	5.90996	63.2865
26	1	4	23	1.2681	1.4163	2.94833	6.07918	64.9101
26	2	4	25	1.2086	1.1315	2.94833	6.17609	63.3052
26	3	4	24	1.1969	1.0469	2.94833	6.13563	65.974
27	1	4	28	1.1412	1.2689	2.94833	5.90309	65.2251
27	2	4	31	1.1063	1.2328	2.94833	6.07918	69.7445
27	3	4	28	1.1237	1.2299	2.94833	6.01773	62.4859
28	1	4	26	1.1826	1.4095	2.97405	6.11394	71.0114
28	2	4	25	1.2012	1.3368	2.97405	6.25527	72.6438
28	3	4	25	1.192	1.2731	2.97405	6.20168	73.286
29	1	4	28	1.2654	1.4211	2.67302	6.20412	65.9058
29	2	4	30	1.2396	1.2468	2.67302	6.32222	59.9314
29	3	4	31	1.4024	1.0313	2.67302	6.27526	69.3758
30	1	4	27	1.2413	1.2797	2.92181	6.17609	67.3352
30	2	4	29	1.279	1.2357	2.92181	6.32222	64.4658
30	3	4	28	1.2256	1.1922	2.92181	6.25527	69.3857
31	1	4	30	1.2847	1.332	2.89444	6.38021	65.0432
31	2	4	31	1.1845	1.3845	2.89444	6.43136	68.4719
31	3	4	31	1.2348	1.4372	2.89444	6.40792	63.014
32	1	4	37	1.335	1.2135	2.89444	6.36173	68.4719
32	2	4	36	1.2162	1.1638	2.83688	6.50515	60.0669
32	3	4	37	1.2677	1.0702	2.89444	6.64842	72.8937
33	1	4	32	1.3314	1.1622	2.77511	6.43136	61.9892
33	2	4	32	1.2585	1.2241	2.74244	6.32222	62.9058
33	3	4	32	1.3036	1.1914	2.77511	6.38021	61.3459
34	1	4	31	1.2197	1.342	2.51396	6.32222	61.548
34	2	4	28	1.3189	1.4163	2.51396	6.07918	59.32
34	3	4	30	1.2994	1.4902	2.51396	6.2511	63.1396
35	1	4	33	1.1806	1.2021	2.67302	6.43136	56.3943
35	2	4	33	1.1632	1.2742	2.67302	6.27875	54.5534
35	3	4	30	1.1568	1.3353	2.67302	6.36173	57.3869
36	1	4	38	1.3133	1.8459	2.77511	6.14613	56.1304
36	2	4	36	1.2988	1.7747	2.77511	6.32222	54.7339
36	3	4	37	1.3483	1.808	2.77511	6.26065	57.2639
37	1	8	35	1.3565	1.446	2.99902	6.63347	54.2639
37	2	8	36	1.3285	1.4579	3.02327	6.70757	55.6944
37	3	8	35	1.3324	1.4137	3.02327	6.67526	53.7916
WT	1	-	31	1.3912	1.4443	2.88963	6.32222	72.4134
WT	2	-	30	1.3598	1.5305	2.88963	6.14613	79.1797
WT	3	-	33	1.3634	1.3957	2.83688	6.23045	78.5732

## Sheet: Source Data 3
Source Data 3. The predicted and observed performance of consortia with different richness gradients..
Consortia	M38	M54	M59	M78	M108	M109	M124	M143	Richness	Swarming motility	Biomass production	Biofilm formation	Pathogen suppression	Colonization	Disease incidence	Pre.Swarming motility	Pre.Biomass production	Pre.Biofilm formation	Pre.Pathogen suppression	Pre.Colonization	Pre.Disease incidence
1	1	0	0	0	0	0	0	0	1	32.3333	1.26587	1.31663	2.93065	6.43431	71.371	32.3333	1.26587	1.31663	2.93065	6.43431	71.371
2	0	1	0	0	0	0	0	0	1	29	1.2235	1.61613	2.88501	6.47495	72.2135	29	1.2235	1.61613	2.88501	6.47495	72.2135
3	0	0	1	0	0	0	0	0	1	19	1.55123	1.23647	2.10299	5.29786	89.8907	19	1.55123	1.23647	2.10299	5.29786	89.8907
4	0	0	0	1	0	0	0	0	1	15	0.864533	1.49843	2.95799	5.90963	78.7779	15	0.864533	1.49843	2.95799	5.90963	78.7779
5	0	0	0	0	1	0	0	0	1	38	1.29887	1.29157	2.86615	6.44722	67.46	38	1.29887	1.29157	2.86615	6.44722	67.46
6	0	0	0	0	0	1	0	0	1	27	1.65297	1.17903	2.86753	6.1761	70.0016	27	1.65297	1.17903	2.86753	6.1761	70.0016
7	0	0	0	0	0	0	1	0	1	40.6667	1.30967	1.21013	2.79608	6.1338	71.2722	40.6667	1.30967	1.21013	2.79608	6.1338	71.2722
8	0	0	0	0	0	0	0	1	1	21	1.17157	1.82897	2.86615	5.89938	65.1492	21	1.17157	1.82897	2.86615	5.89938	65.1492
9	1	1	0	0	0	0	0	0	2	22	1.21443	1.72553	2.93949	6.5502	89.4914	30.6667	1.24468	1.46638	2.90783	6.45463	71.7923
10	0	1	1	0	0	0	0	0	2	21	1.24217	1.44957	2.54615	6.35827	65.9483	24	1.38737	1.4263	2.494	5.88641	81.0521
11	1	0	0	1	0	0	0	0	2	30.3333	1.21357	0.869067	2.92181	6.02347	76.184	23.6667	1.0652	1.40753	2.94432	6.17197	75.0745
12	0	1	0	0	1	0	0	0	2	36.6667	1.27807	1.2699	2.9173	5.94919	66.5565	33.5	1.26118	1.45385	2.87558	6.46108	69.8367
13	1	0	0	0	0	0	1	0	2	32.6667	1.17193	1.19443	2.85639	5.99589	70.7856	36.5	1.28777	1.26338	2.86336	6.28406	71.3216
14	0	0	1	1	0	0	0	0	2	30.6667	1.26557	1.18103	2.07956	5.9294	84.917	17	1.20788	1.36745	2.53049	5.60375	84.3343
15	1	0	0	0	0	0	0	1	2	36.6667	1.15857	1.09883	2.97405	5.9777	67.8144	26.6667	1.21872	1.5728	2.8984	6.16685	68.2601
16	0	0	1	0	0	1	0	0	2	21	1.21513	1.36623	2.7356	6.0212	67.4798	23	1.6021	1.20775	2.48526	5.73698	79.9461
17	0	0	0	1	1	0	0	0	2	29	1.18227	0.992067	2.88501	6.0607	69.6076	26.5	1.0817	1.395	2.91207	6.17842	73.1189
18	0	0	1	0	0	0	1	0	2	25.3333	1.3332	1.20297	2.45597	6.14314	67.7911	29.8333	1.43045	1.2233	2.44953	5.71583	80.5815
19	0	1	0	0	0	1	0	0	2	26	1.16503	1.22823	2.94409	6.37838	73.959	28	1.43823	1.39758	2.87627	6.32552	71.1075
20	0	0	0	1	0	0	0	1	2	29	1.16167	1.58503	2.95799	6.2175	67.35	18	1.01805	1.6637	2.91207	5.90451	71.9636
21	0	0	0	0	1	0	0	1	2	38.6667	1.19733	1.21967	2.94833	5.7782	73.1895	29.5	1.23522	1.56027	2.86615	6.1733	66.3046
22	0	0	0	0	1	1	0	0	2	25	1.19393	1.38713	2.9173	5.8451	78.5396	32.5	1.47592	1.2353	2.86684	6.31166	68.7308
23	0	0	0	0	0	1	1	0	2	33	1.14467	1.32207	2.83688	5.5441	75.2691	33.8333	1.48132	1.19458	2.8318	6.15495	70.6369
24	0	0	0	0	0	0	1	1	2	33	1.18243	1.70687	2.97005	5.9542	67.2636	30.8333	1.24062	1.51955	2.83111	6.01659	68.2107
25	1	1	0	1	1	0	0	0	4	28.3333	1.10557	1.35583	2.99074	5.9031	68.43	28.5833	1.16319	1.43069	2.90995	6.31653	72.4556
26	0	1	0	1	0	1	0	1	4	24	1.22453	1.19823	2.94833	6.1303	64.7297	23	1.22814	1.53064	2.89417	6.11502	71.5355
27	1	0	0	1	1	1	0	0	4	29	1.12373	1.24387	2.94833	6	65.8185	22.4667	1.01645	1.05713	2.32446	4.99345	57.5221
28	0	1	0	0	1	0	1	1	4	25.3333	1.19193	1.3398	2.97405	6.1903	72.3137	32.1667	1.2509	1.4867	2.85334	6.23884	69.0237
29	1	1	1	1	0	0	0	0	4	29.6667	1.30247	1.23307	2.67302	6.2672	65.071	23.8333	1.22628	1.41692	2.71916	6.02919	78.0633
30	0	1	0	0	0	1	1	1	4	28	1.24863	1.23587	2.92181	6.25119	67.0622	29.4167	1.33942	1.45857	2.85369	6.17106	69.6591
31	1	0	0	0	1	1	1	0	4	30.6667	1.23467	1.38457	2.89444	6.4065	65.5097	34.5	1.38184	1.24934	2.8651	6.29786	70.0262
32	0	1	1	0	1	0	0	1	4	36.6667	1.27297	1.14917	2.87525	6.5051	67.1442	26.75	1.31129	1.49328	2.68007	6.02985	73.6784
33	1	0	1	0	0	1	1	0	4	32	1.29783	1.19257	2.76422	6.37793	62.0803	29.75	1.44493	1.23557	2.67431	6.01052	75.6339
34	0	0	1	1	0	1	0	1	4	29.6667	1.27933	1.41617	2.51396	6.2175	61.3358	25.4167	1.3446	1.28102	2.68115	5.87935	77.4856
35	1	0	1	1	0	0	1	0	4	32	1.16687	1.27053	2.67302	6.35728	56.1115	26.75	1.24782	1.31542	2.69693	5.9439	77.828
36	0	0	1	0	1	0	1	1	4	37	1.32013	1.80953	2.77511	6.243	56.0427	29.6667	1.33283	1.39178	2.65784	5.94456	73.443
37	1	1	1	1	1	1	1	1	8	35.3333	1.33913	1.4392	3.01518	6.6721	54.5833	27.75	1.29227	1.39717	2.78407	6.09666	73.267

## Sheet: Source Data 4
Source Data 4. The normalized trait values and greenhouse performances of consortia with different richness gradients.
Consortia	M38	M54	M59	M78	M108	M109	M124	M143	Richness	Swarming	Biomass	Biofilm	Pathogen suppression	Average performance	Colonization	Disease incidence
1	1	0	0	0	0	0	0	0	1	0.675325	0.509026	0.466264	0.909651	0.653105	6.43431	71.371
2	0	1	0	0	0	0	0	0	1	0.545455	0.455291	0.778276	0.860864	0.699299	6.47495	72.2135
3	0	0	1	0	0	0	0	0	1	0.155844	0.870968	0.382748	0.0250387	0	5.29786	89.8907
4	0	0	0	1	0	0	0	0	1	0	0	0.655659	0.938867	0.0927885	5.90963	78.7779
5	0	0	0	0	1	0	0	0	1	0.896104	0.550881	0.44015	0.840706	0.750331	6.44722	67.46
6	0	0	0	0	0	1	0	0	1	0.467532	1	0.322916	0.842187	0.695093	6.1761	70.0016
7	0	0	0	0	0	0	1	0	1	1	0.56458	0.355315	0.765817	0.725887	6.1338	71.2722
8	0	0	0	0	0	0	0	1	1	0.233766	0.389422	1	0.840706	0.597191	5.89938	65.1492
9	1	1	0	0	0	0	0	0	2	0.272727	0.443791	0.892246	0.919099	0.634306	6.5502	89.4914
10	0	1	1	0	0	0	0	0	2	0.233766	0.478967	0.60475	0.498691	0.221388	6.35827	65.9483
11	1	0	0	1	0	0	0	0	2	0.597403	0.442692	0	0.900202	0.293403	6.02347	76.184
12	0	1	0	0	1	0	0	0	2	0.844156	0.5245	0.417578	0.895378	0.72351	5.94919	66.5565
13	1	0	0	0	0	0	1	0	2	0.688312	0.389887	0.338959	0.830279	0.471604	5.99589	70.7856
14	0	0	1	1	0	0	0	0	2	0.61039	0.508646	0.324999	0	0.00547457	5.9294	84.917
15	1	0	0	0	0	0	0	1	2	0.844156	0.372934	0.239365	0.956036	0.567367	5.9777	67.8144
16	0	0	1	0	0	1	0	0	2	0.233766	0.444679	0.517936	0.701182	0.268609	6.0212	67.4798
17	0	0	0	1	1	0	0	0	2	0.545455	0.402993	0.128138	0.860864	0.291751	6.0607	69.6076
18	0	0	1	0	0	0	1	0	2	0.402597	0.594428	0.347849	0.402309	0.18136	6.14314	67.7911
19	0	1	0	0	0	1	0	0	2	0.428571	0.381136	0.374171	0.924011	0.390639	6.37838	73.959
20	0	0	0	1	0	0	0	1	2	0.545455	0.376866	0.745876	0.938867	0.680257	6.2175	67.35
21	0	0	0	0	1	0	0	1	2	0.922078	0.422103	0.365246	0.928548	0.698191	5.7782	73.1895
22	0	0	0	0	1	1	0	0	2	0.38961	0.417791	0.539709	0.895378	0.468732	5.8451	78.5396
23	0	0	0	0	0	1	1	0	2	0.701299	0.355304	0.471924	0.809425	0.524119	5.5441	75.2691
24	0	0	0	0	0	0	1	1	2	0.701299	0.403205	0.872799	0.951762	0.86708	5.9542	67.2636
25	1	1	0	1	1	0	0	0	4	0.519481	0.305712	0.507101	0.97387	0.505676	5.9031	68.43
26	0	1	0	1	0	1	0	1	4	0.350649	0.456602	0.342918	0.928548	0.373713	6.1303	64.7297
27	1	0	0	1	1	1	0	0	4	0.545455	0.328753	0.390457	0.928548	0.440143	6	65.8185
28	0	1	0	0	1	0	1	1	4	0.402597	0.415254	0.490398	0.956036	0.481379	6.1903	72.3137
29	1	1	1	1	0	0	0	0	4	0.571429	0.555448	0.379206	0.634294	0.409487	6.2672	65.071
30	0	1	0	0	0	1	1	1	4	0.506494	0.487169	0.382123	0.900202	0.488168	6.25119	67.0622
31	1	0	0	0	1	1	1	0	4	0.61039	0.469454	0.537035	0.870942	0.611073	6.4065	65.5097
32	0	1	1	0	1	0	0	1	4	0.844156	0.518032	0.291801	0.850437	0.620707	6.5051	67.1442
33	1	0	1	0	0	1	1	0	4	0.662338	0.549571	0.337014	0.73177	0.490898	6.37793	62.0803
34	0	0	1	1	0	1	0	1	4	0.571429	0.526107	0.569955	0.464291	0.404501	6.2175	61.3358
35	1	0	1	1	0	0	1	0	4	0.662338	0.383461	0.418238	0.634294	0.385093	6.35728	56.1115
36	0	0	1	0	1	0	1	1	4	0.857143	0.577855	0.979755	0.743409	1	6.243	56.0427
37	1	1	1	1	1	1	1	1	8	0.792208	0.601953	0.593951	1	0.901338	6.6721	54.5833
38	-	-	-	-	-	-	-	-	WT	0.636364	0.642963	0.612321	0.84701	0.756607	6.23293	76.7221
39	-	-	-	-	-	-	-	-	Pathogen only	-	-	-	-	-	-	91.2724

## Sheet: Source Data 5
Source Data 5. Composition of optimized and randomly assembled 8-mutant consortia
Consortia	Strain	Swarming motility	Biomass production	Biofilm formation	Pathogen suppression	Average performance
optimized	M38	0.53125	0.553363	0.740269	0.779661	0.756343
optimized	M54	0.46875	0.552036	0.954158	0.830509	0.837237
optimized	M59	0.479167	0.761026	0.845422	0.254237	0.649767
optimized	M78	0.0833333	0.429985	0.831336	0.830509	0.583456
optimized	M108	0.697917	0.559759	0.705919	0.847458	0.839492
optimized	M109	0.479167	0.80724	0.853454	0.79661	0.889991
optimized	M124	0.791667	0.568507	0.84987	0.779661	0.911425
optimized	M143	0.453125	0.56187	1	0.79661	0.839715
random1	M473	0.751488	0.574306	0.784238	0.489048	0.754143
random1	M418	0.187872	0.510715	0.550472	0.480381	0.40399
random1	M359	0.263021	0.464725	0.685924	0.862451	0.624106
random1	M294	0.150298	0.515257	0.64727	0.266009	0.34335
random1	M68	0.536458	0.554148	0.709131	0.889831	0.790577
random1	M29	0.03125	0.292368	0.782775	0.262712	0.258904
random1	M114	0.703125	0.30902	0.851477	0	0.458017
random1	M389	0.375744	0.512513	0.526651	0.521281	0.487236
random2	M111	0.65625	0.596923	0.36859	0.889831	0.718918
random2	M430	0.563616	0.511756	0.262893	0.815248	0.574739
random2	M363	0.375744	0.410786	0.607966	0.565625	0.496872
random2	M236	0	0.538536	0.542026	0.369247	0.291399
random2	M452	0.676339	0.475134	0.506079	0.454195	0.557923
random2	M52	0.473958	0.371946	0.758063	0.423729	0.52408
random2	M350	0.526042	0.493776	0.327966	0.514324	0.457408
random2	M311	0.225446	0.568723	0.69307	0.289761	0.42314
random3	M187	0.0375744	0.648117	0.768647	0.0919547	0.330247
random3	M430	0.563616	0.511756	0.262893	0.815248	0.574739
random3	M363	0.375744	0.410786	0.607966	0.565625	0.496872
random3	M452	0.676339	0.475134	0.506079	0.454195	0.557923
random3	M52	0.473958	0.371946	0.758063	0.423729	0.52408
random3	M469	0.789062	0.453843	0.550797	0.501703	0.631871
random3	M269	0.225446	0.533804	0.645754	0.392742	0.431493
random3	M370	0.263021	0.393753	0.664486	0.614278	0.486973
random4	M457	0	0.501441	0.503589	0.651562	0.374658
random4	M109	0.479167	0.80724	0.853454	0.79661	0.889991
random4	M474	0.826637	0.563991	0.545816	0.475025	0.678603
random4	M68	0.536458	0.554148	0.709131	0.889831	0.790577
random4	M187	0.0375744	0.648117	0.768647	0.0919547	0.330247
random4	M66	0.296875	0.371885	0.719016	0.457627	0.450682
random4	M441	0.263021	0.277832	0.712885	0.741403	0.510972
random4	M462	0.789062	0.483651	0.878979	0.482572	0.76831
random5	M294	0.150298	0.515257	0.64727	0.266009	0.34335
random5	M29	0.03125	0.292368	0.782775	0.262712	0.258904
random5	M90	0.0625	0.658401	0.00518967	0	0
random5	M68	0.536458	0.554148	0.709131	0.889831	0.790577
random5	M452	0.676339	0.475134	0.506079	0.454195	0.557923
random5	M184	0.225446	0.595597	0.819861	0.264969	0.47503
random5	M473	0.751488	0.574306	0.784238	0.489048	0.754143
random5	M418	0.187872	0.510715	0.550472	0.480381	0.40399
random6	M55	0.479167	0.254962	0.776226	0.59322	0.554633
random6	M370	0.263021	0.393753	0.664486	0.614278	0.486973
random6	M474	0.826637	0.563991	0.545816	0.475025	0.678603
random6	M59	0.479167	0.761026	0.845422	0.254237	0.649767
random6	M479	0.901786	0.0871537	0.319087	0.239639	0.3308
random6	M90	0.0625	0.658401	0.00518967	0	0
random6	M465	0.676339	0.49283	0.699784	0.415049	0.62728
random6	M111	0.65625	0.596923	0.36859	0.889831	0.718918
random7	M236	0	0.538536	0.542026	0.369247	0.291399
random7	M430	0.563616	0.511756	0.262893	0.815248	0.574739
random7	M52	0.473958	0.371946	0.758063	0.423729	0.52408
random7	M77	0.458333	0.844827	0.714445	0.288136	0.636032
random7	M470	0.33817	0.604209	0.710936	0.454416	0.556305
random7	M184	0.225446	0.595597	0.819861	0.264969	0.47503
random7	M452	0.676339	0.475134	0.506079	0.454195	0.557923
random7	M272	0.187872	0.555191	0.77471	0.213308	0.404651
random8	M474	0.826637	0.563991	0.545816	0.475025	0.678603
random8	M470	0.33817	0.604209	0.710936	0.454416	0.556305
random8	M60	0.5	0.465038	0.612628	0.855932	0.687513
random8	M478	0.901786	0.495385	0.192297	0.129606	0.399816
random8	M350	0.526042	0.493776	0.327966	0.514324	0.457408
random8	M59	0.479167	0.761026	0.845422	0.254237	0.649767
random8	M469	0.789062	0.453843	0.550797	0.501703	0.631871
random8	M439	0.33817	0.19011	0.578407	0.681566	0.42767
WT	WT	0.526042	0.523017	0.718028	0.694915	0.69895

## Sheet: Source Data 6
Source Data 6. The performance of optimized and randomly assembled 8-mutant consortia regarding four traits measured in vitro and root colonization and plant protection measured in vivo.
Consortia	Colonization	Disease incidence	Swarming motility	Biomass production	Biofilm formation	Pathogen supression
optimized	6.39034	42.0534	35	1.3136	1.8029	2.9965
optimized	6.26269	43.0032	34	1.3095	1.71	2.9903
optimized	6.15303	43.4788	36	1.3238	1.7585	2.9965
random1	5.90919	68.2369	27	1.2326	1.6132	2.5835
random1	5.82392	56.0999	27	1.2156	1.7014	2.5835
random1	5.98191	56.0999	26	1.2417	1.6338	2.5586
random2	5.67894	50.1196	33	1.3654	1.9566	2.8944
random2	5.83579	50.1196	31	1.3316	1.9026	2.999
random2	6.01637	56.0999	33	1.3697	1.851	2.798
random3	6.01637	68.2369	34	1.2126	1.4947	2.5835
random3	5.56136	82.1616	34	1.1825	1.464	2.5835
random3	5.83579	68.2369	33	1.1962	1.2729	2.6157
random4	5.63106	68.2369	29	1.0621	1.7091	2.673
random4	5.88241	68.2369	30	1.0574	1.7842	2.6548
random4	5.87397	68.2369	29	1.1035	1.7371	2.6157
random5	5.5748	82.1616	30	1.1241	1.156	2.5586
random5	5.23556	68.2369	27	1.1264	1.2062	2.514
random5	5.97749	68.2369	27	1.0837	1.136	2.5835
random6	5.32499	50.1196	26	1.1679	1.8251	2.673
random6	5.60075	56.0999	27	1.1946	1.7956	2.7751
random6	5.75467	56.0999	24	1.1464	1.7752	2.582
random7	5.44941	68.2369	22	1.103	1.1003	2.5586
random7	5.57495	78.3437	26	1.1823	1.2346	2.4963
random7	5.42629	68.2369	21	1.0613	1.3484	2.5586
random8	5.59736	82.1616	23	1.1948	1.1364	2.514
random8	5.40524	82.1616	21	1.1859	1.3652	2.5586
random8	5.30448	68.2369	20	1.1895	1.1324	2.5586
WT	5.4141	68.2369	29	1.1912	1.4443	2.5835
WT	5.37583	68.2369	30	1.1598	1.3305	2.5835
WT	5.22923	78.3437	27	1.1634	1.3957	2.5586
Pathogen only		97.5162
Pathogen only		97.5162
Pathogen only		82.1616

## Sheet: Source Data 7
Source Data 6. Biomass production of each mutant strain on its own (diagonal) or other strains’ supernatant
Strain	Supernatant	Biomass production
M38	M38	0.5746
M38	M38	0.587
M38	M38	0.5849
M38	M54	0.5554
M38	M54	0.5755
M38	M54	0.5741
M38	M59	0.5665
M38	M59	0.5373
M38	M59	0.5518
M38	M78	0.5715
M38	M78	0.5291
M38	M78	0.6715
M38	M108	0.5509
M38	M108	0.5593
M38	M108	0.5694
M38	M109	0.552
M38	M109	0.5444
M38	M109	0.5429
M38	M124	0.5497
M38	M124	0.5982
M38	M124	0.6387
M38	M143	0.5354
M38	M143	0.5227
M38	M143	0.5851
M38	WT	0.5917
M38	WT	0.5532
M38	WT	0.5594
M38	LB	0.6112
M38	LB	0.5922
M38	LB	0.621
M54	M38	0.4732
M54	M38	0.4864
M54	M38	0.498
M54	M54	0.5311
M54	M54	0.5238
M54	M54	0.4918
M54	M59	0.4836
M54	M59	0.4833
M54	M59	0.4906
M54	M78	0.4861
M54	M78	0.4896
M54	M78	0.4875
M54	M108	0.5106
M54	M108	0.4682
M54	M108	0.48
M54	M109	0.4944
M54	M109	0.5038
M54	M109	0.4951
M54	M124	0.4934
M54	M124	0.4852
M54	M124	0.4838
M54	M143	0.4948
M54	M143	0.4991
M54	M143	0.504
M54	WT	0.4785
M54	WT	0.479
M54	WT	0.4742
M54	LB	0.5272
M54	LB	0.5385
M54	LB	0.5606
M59	M38	0.5878
M59	M38	0.6353
M59	M38	0.5372
M59	M54	0.5758
M59	M54	0.5678
M59	M54	0.5711
M59	M59	0.5903
M59	M59	0.5527
M59	M59	0.5625
M59	M78	0.5262
M59	M78	0.5433
M59	M78	0.537
M59	M108	0.546
M59	M108	0.5866
M59	M108	0.5609
M59	M109	0.5357
M59	M109	0.5383
M59	M109	0.5712
M59	M124	0.5181
M59	M124	0.5312
M59	M124	0.5213
M59	M143	0.5476
M59	M143	0.5615
M59	M143	0.5421
M59	WT	0.5452
M59	WT	0.5358
M59	WT	0.5557
M59	LB	0.5964
M59	LB	0.5914
M59	LB	0.6018
M78	M38	0.5248
M78	M38	0.5425
M78	M38	0.5395
M78	M54	0.5462
M78	M54	0.5684
M78	M54	0.5795
M78	M59	0.5625
M78	M59	0.5224
M78	M59	0.5287
M78	M78	0.664
M78	M78	0.6054
M78	M78	0.5789
M78	M108	0.5385
M78	M108	0.5626
M78	M108	0.5675
M78	M109	0.5675
M78	M109	0.5535
M78	M109	0.5548
M78	M124	0.5541
M78	M124	0.5796
M78	M124	0.5251
M78	M143	0.5262
M78	M143	0.5389
M78	M143	0.5645
M78	WT	0.5447
M78	WT	0.5491
M78	WT	0.5625
M78	LB	0.6114
M78	LB	0.6017
M78	LB	0.6272
M108	M38	0.5381
M108	M38	0.5932
M108	M38	0.5763
M108	M54	0.5898
M108	M54	0.5571
M108	M54	0.5641
M108	M59	0.541
M108	M59	0.5431
M108	M59	0.5558
M108	M78	0.6057
M108	M78	0.5739
M108	M78	0.6141
M108	M108	0.5543
M108	M108	0.5568
M108	M108	0.5696
M108	M109	0.5663
M108	M109	0.552
M108	M109	0.5451
M108	M124	0.6053
M108	M124	0.5986
M108	M124	0.6232
M108	M143	0.59
M108	M143	0.5954
M108	M143	0.5649
M108	WT	0.5432
M108	WT	0.56
M108	WT	0.531
M108	LB	0.6255
M108	LB	0.5828
M108	LB	0.608
M109	M38	0.5955
M109	M38	0.4887
M109	M38	0.5213
M109	M54	0.5627
M109	M54	0.572
M109	M54	0.5542
M109	M59	0.5567
M109	M59	0.5067
M109	M59	0.6617
M109	M78	0.5206
M109	M78	0.5221
M109	M78	0.6347
M109	M108	0.5212
M109	M108	0.5895
M109	M108	0.531
M109	M109	0.5606
M109	M109	0.5162
M109	M109	0.5288
M109	M124	0.4645
M109	M124	0.5584
M109	M124	0.5923
M109	M143	0.5605
M109	M143	0.6581
M109	M143	0.5715
M109	WT	0.5361
M109	WT	0.5456
M109	WT	0.5386
M109	LB	0.5936
M109	LB	0.5659
M109	LB	0.627
M124	M38	0.5718
M124	M38	0.5702
M124	M38	0.6125
M124	M54	0.5834
M124	M54	0.5977
M124	M54	0.5964
M124	M59	0.6027
M124	M59	0.6318
M124	M59	0.6462
M124	M78	0.6523
M124	M78	0.5857
M124	M78	0.622
M124	M108	0.6835
M124	M108	0.6463
M124	M108	0.646
M124	M109	0.5993
M124	M109	0.5653
M124	M109	0.6054
M124	M124	0.6877
M124	M124	0.6815
M124	M124	0.674
M124	M143	0.6863
M124	M143	0.6775
M124	M143	0.6687
M124	WT	0.5798
M124	WT	0.5967
M124	WT	0.6272
M124	LB	0.6416
M124	LB	0.6305
M124	LB	0.6359
M143	M38	0.5162
M143	M38	0.6509
M143	M38	0.5576
M143	M54	0.5812
M143	M54	0.5627
M143	M54	0.5608
M143	M59	0.5314
M143	M59	0.55
M143	M59	0.5514
M143	M78	0.5636
M143	M78	0.5382
M143	M78	0.6026
M143	M108	0.5534
M143	M108	0.5734
M143	M108	0.5672
M143	M109	0.5689
M143	M109	0.5634
M143	M109	0.562
M143	M124	0.5388
M143	M124	0.529
M143	M124	0.5186
M143	M143	0.5461
M143	M143	0.553
M143	M143	0.5352
M143	WT	0.5426
M143	WT	0.6179
M143	WT	0.5266
M143	LB	0.5852
M143	LB	0.5617
M143	LB	0.6159
WT	M38	0.5668
WT	M38	0.5761
WT	M38	0.5292
WT	M54	0.5726
WT	M54	0.5548
WT	M54	0.5535
WT	M59	0.5511
WT	M59	0.5417
WT	M59	0.567
WT	M78	0.5442
WT	M78	0.5571
WT	M78	0.5312
WT	M108	0.5697
WT	M108	0.5808
WT	M108	0.6058
WT	M109	0.5385
WT	M109	0.5467
WT	M109	0.5483
WT	M124	0.5638
WT	M124	0.5673
WT	M124	0.5808
WT	M143	0.5635
WT	M143	0.581
WT	M143	0.564
WT	WT	0.5728
WT	WT	0.5699
WT	WT	0.5438
WT	LB	0.6126
WT	LB	0.6215
WT	LB	0.6174

## Sheet: Source Data 8
Source Data 7. Relationships between OD600 and CFUs of wild-type, M78 and M109 strains.
strain	OD600	CFU	lgCFU
WT	0.529	60000000	7.77815
WT	0.529	37500000	7.57403
WT	0.529	60000000	7.77815
WT	0.781	75000000	7.87506
WT	0.781	60000000	7.77815
WT	0.781	95000000	7.97772
WT	1.222	125000000	8.09691
WT	1.222	105000000	8.02119
WT	1.222	135000000	8.13033
WT	1.755	460000000	8.66276
WT	1.755	365000000	8.56229
WT	1.755	300000000	8.47712
M78	0.521	45000000	7.65321
M78	0.521	30000000	7.47712
M78	0.521	50000000	7.69897
M78	0.8	55000000	7.74036
M78	0.8	50000000	7.69897
M78	0.8	75000000	7.87506
M78	1.253	90000000	7.95424
M78	1.253	145000000	8.16137
M78	1.253	110000000	8.04139
M78	1.723	415000000	8.61805
M78	1.723	325000000	8.51188
M78	1.723	255000000	8.40654
M109	0.524	55000000	7.74036
M109	0.524	40000000	7.60206
M109	0.524	30000000	7.47712
M109	0.832	130000000	8.11394
M109	0.832	85000000	7.92942
M109	0.832	95000000	7.97772
M109	1.264	170000000	8.23045
M109	1.264	150000000	8.17609
M109	1.264	170000000	8.23045
M109	1.722	410000000	8.61278
M109	1.722	365000000	8.56229
M109	1.722	380000000	8.57978
