# Supplementary material for: Engineering multifunctional rhizosphere probiotics using consortia of Bacillus amyloliquefaciens transposon insertion mutants
Source: eLife journal article supplement (doi:10.7554/elife.90726), 2023-09-14
Supplement: supp [file elife-90726-supp-v1.zip]

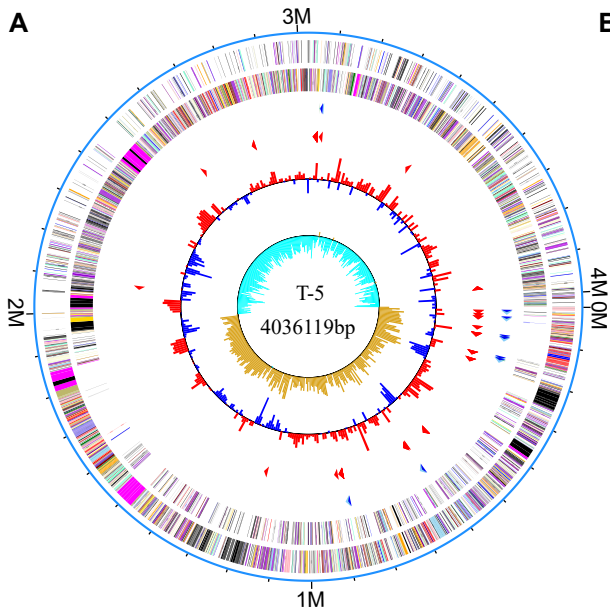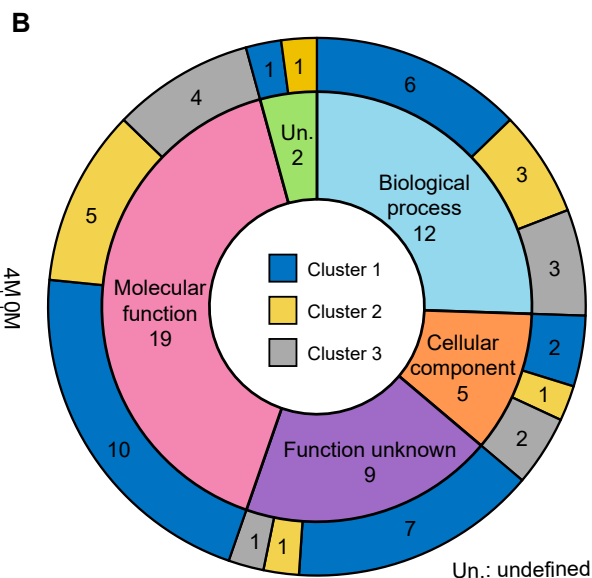

### Non-coding RNA categories

■ tRNA ■ 5S RNA ■ 16S rRNA ■ 23S rRNA

### COG Functional categories

■ RNA processing and modification

■ Chromatin structure and dynamics

■ Energy production and conversion

■ Cell division, chromosome partitioning

■ Amino acid transport and metabolism

■ Nucleotide transport and metabolism

■ Carbohydrate transport and metabolism

■ Coenzyme transport and metabolism

■ Lipid transport and metabolism

■ Translation, ribosomal structure and biogenesis

■ Transcription

■ DNA replication, recombination and repair

■ Cell envelope biogenesis, outer membrane

■ Cell motility

■ Posttranslational modification, protein turnover, chaperones

■ Inorganic ion transport and metabolism

■ Secondary metabolites biosynthesis, transport and catabolism

■ General function prediction only

■ Function unknown

■ Signal transduction mechanisms

■ Intracellular trafficking, secretion, and vesicular transport

■ Defense mechanisms

■ Cytoskeleton

■ No assigned COG
