# Supplementary material for: Engineering multifunctional rhizosphere probiotics using consortia of Bacillus amyloliquefaciens transposon insertion mutants
Source: eLife journal article supplement (doi:10.7554/elife.90726), 2023-09-14

| Mutant strain | Phenotypic characteristics |         |         |                      | Disrupted gene | Annotated gene function (General function*) |
|---------------|----------------------------|---------|---------|----------------------|----------------|---------------------------------------------|
|               | Swarming                   | Biomass | Biofilm | Pathogen suppression |                |                                             |
| M38           | ns                         | 0.92    | 0.90    | 1.02                 | <i>nhaC</i>    | sodium-proton antiporter (C)                |
| M54           | ns                         | 0.89    | 1.11    | ns                   | <i>hutU</i>    | histidine utilization (E)                   |
| M59           | 0.61                       | 1.13    | 0.85    | 0.73                 | <i>comQ</i>    | competence protein (R)                      |
| M78           | 0.48                       | 0.63    | ns      | 1.03                 | <i>dfnG</i>    | difficidin polyketide synthase (Q)          |
| M108          | 1.21                       | 0.95    | 0.89    | ns                   | <i>parE</i>    | DNA topoisomerase IV subunit B (L)          |
| M109          | 0.86                       | 1.21    | 0.81    | ns                   | <i>hutI</i>    | imidazolonepropionase (Q)                   |
| M124          | 1.30                       | 0.95    | 0.83    | 0.97                 | <i>DeoR</i>    | DNA-binding transcriptional repressor (K)   |
| M143          | 0.67                       | 0.85    | 1.26    | ns                   | <i>YsnB</i>    | metallophosphoesterase (R)                  |

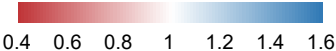

Supplement: supp [file elife-90726-supp-v1.zip]
