# Supplementary material for: Engineering multifunctional rhizosphere probiotics using consortia of Bacillus amyloliquefaciens transposon insertion mutants
Source: eLife. 2023 Sep 14;12:e90726. doi: 10.7554/eLife.90726 (PMC10519709; doi:10.7554/eLife.90726)
Supplement: Supplementary file 1. — (a) The profile of the 1999 mutants and the wild-type T-5. (b) The profile of the 479 mutants and the wild-type T-5. (c) The profile of the selected mutants used in the single mutant greenhouse experiment. [file elife-90726-supp1.xlsx]

## Sheet: Supplementary file 1a
Supplementary file 1a. The profile of the 1999 mutants and the wild-type T-5.
No.	Strain	Swarming	Biomass	Biofilm	Antagonism
1	T-5	0.526042	0.523017	0.718028	0.694915
2	M1	0.604167	0.545219	0.628074	0.81356
3	M2	0.03125	0.84356	0.00667243	0
4	M3	0.489583	0.442172	0.629927	0.805085
5	M4	0.494792	0.455083	0.569134	0.81356
6	M5	0.03125	0.623952	0.691215	0.855932
7	M6	0.619792	0.402896	0.666625	0.822034
8	M7	0.677083	0.495747	0.697146	0.805085
9	M8	0.526042	0.553062	0.738663	0.762712
10	M9	0.546875	0.572971	0.532435	0.838983
11	M10	0.875	0.593906	0.720623	0.79661
12	M11	0.0208333	0.713183	0.745212	0.686441
13	M12	0.5	0.684766	0.492648	0.81356
14	M13	0.484375	0.398612	0.51699	0.830509
15	M14	0.442708	0.447722	0.734833	0.822034
16	M15	0.5	0.316742	0	0.830509
17	M16	0.510417	0.505038	0.714939	0.805085
18	M17	0.489583	0.553122	0.631904	0.81356
19	M18	0.494792	0.40905	0.561596	0.864407
20	M19	0.505208	0.395777	0.828617	0.864407
21	M20	0.692708	0.388899	0.713703	0.847458
22	M21	0.03125	0.865219	0	0
23	M22	0.0677083	0.336229	0.538366	0.228814
24	M23	0.666667	0.582986	0.665884	0.762712
25	M24	0.536458	0.484284	0.646237	0.711865
26	M25	0.513889	0.413876	0.550846	0.81356
27	M26	0.463542	0.446275	0.716298	0.81356
28	M27	0.479167	0.47089	0.672433	0.81356
29	M28	0.361111	0.578582	0.703447	0.338983
30	M29	0.03125	0.292368	0.782775	0.262712
31	M30	0.734375	0.276139	0.661312	0.847458
32	M31	0.614583	0.44917	0.525269	0.838983
33	M32	0.453125	0.527119	0.788212	0.81356
34	M33	0.53125	0.578582	0.565798	0.838983
35	M34	0.536458	0.337979	0.815767	0.81356
36	M35	0.473958	0.482413	0.619795	0.711865
37	M36	0.682292	0.562413	0.513407	0.81356
38	M37	0.401042	0.629261	0.641666	0.305085
39	M38	0.53125	0.553363	0.740269	0.779661
40	M39	0.0208333	0.585822	0.609292	0.90678
41	M40	0.463542	0.427934	0.78537	0.779661
42	M41	0.46875	0.356561	0.679105	0.79661
43	M42	0.515625	0.321388	0.884715	0.889831
44	M43	0.489583	0.47451	0.583467	0.847458
45	M44	0.703125	0.59994	0.642778	0.822034
46	M45	0	0.466425	0.862103	0
47	M46	0.583333	0.5454	0.757939	0.81356
48	M47	0.765625	0.585158	0.782157	0.889831
49	M48	0.552083	0.52181	0.714074	0.932204
50	M49	0.520833	0.372489	0.666008	0.81356
51	M50	0.734375	0.526094	0.721488	0.847458
52	M51	0.53125	0.295445	0.809094	0.847458
53	M52	0.473958	0.371946	0.758063	0.423729
54	M53	0.677083	0.421297	0.761522	0.805085
55	M54	0.46875	0.552036	0.954158	0.830509
56	M55	0.479167	0.254962	0.776226	0.59322
57	M56	0.583333	0.212066	0.989868	0.779661
58	M57	0.453125	0.796983	0.467935	0.5
59	M58	0.625	0.39638	0.934882	0.711865
60	M59	0.479167	0.761026	0.845422	0.254237
61	M60	0.5	0.465038	0.612628	0.855932
62	M61	0.489583	0.3746	0.557395	0.847458
63	M62	0.567708	0.213695	0.820091	0.855932
64	M63	0.484375	0.589321	0.591252	0.779661
65	M64	0.880208	0.229985	0.856172	0.745763
66	M65	0.723958	0.276983	0.935253	0.81356
67	M66	0.296875	0.371885	0.719016	0.457627
68	M67	0.822917	0.213575	0.825775	0.81356
69	M68	0.536458	0.554148	0.709131	0.889831
70	M69	0.473958	0.560181	0.809465	0.81356
71	M70	0.59375	0.485852	0.793649	0.889831
72	M71	0.0416667	0.472278	0.916718	0.864407
73	M72	0.96875	0.226546	0.820462	0
74	M73	0.619792	0.393243	0.864327	0.79661
75	M74	1	0.299487	0.843816	0.59322
76	M75	0.8125	0.245551	0.853824	0.81356
77	M76	0.65625	0.293756	0.894847	0.79661
78	M77	0.458333	0.844827	0.714445	0.288136
79	M78	0.0833333	0.429985	0.831336	0.830509
80	M79	0.479167	0.329231	0.936118	0.762712
81	M80	0.364583	0.353002	0.920301	0.20339
82	M81	0.0625	0.824434	0.79785	0.516949
83	M82	0.572917	1	0.0077845	0.745763
84	M83	0.536458	0.351674	0.74583	0.508475
85	M84	0.5625	0.511373	0.703077	0.771187
86	M85	0.59375	0.463831	0.730879	0.627119
87	M86	0.4375	0.491704	0.639936	0.864407
88	M87	0.59375	0.518492	0.751884	0.847458
89	M88	0.46875	0.422443	0.850365	0.779661
90	M89	0.65625	0.501176	0.938712	0.864407
91	M90	0.0625	0.658401	0.00518967	0
92	M91	0.885417	0.455505	0.81762	0.516949
93	M92	0.572917	0.593544	0.69208	0.79661
94	M93	0.473958	0.652247	0.890399	0.81356
95	M94	0.526042	0.526817	0.619918	0.805085
96	M95	0.5	0.242836	0.890399	0.847458
97	M96	0.4375	0.472398	0.713333	0.805085
98	M97	0.427083	0.288265	0.824663	0.898305
99	M98	0.510417	0.310588	0.687137	0.79661
100	M99	0.463542	0.300332	0.745953	0.61017
101	M100	0.46875	0.314691	0.8731	0.974577
102	M101	0.5	0.35813	0.925491	1
103	M102	0.555556	0.540573	0.862227	0.711865
104	M103	0.640625	0.466063	0.825652	0.779661
105	M104	0.515625	0.276139	0.789201	0.79661
106	M105	0.576389	0.382262	0.765353	0.79661
107	M106	0.4375	0.848024	0.573706	0.79661
108	M107	0.536458	0.519819	0.814778	0.79661
109	M108	0.697917	0.559759	0.705919	0.847458
110	M109	0.479167	0.80724	0.853454	0.79661
111	M110	0.479167	0.24537	0.916965	0.79661
112	M111	0.65625	0.596923	0.36859	0.889831
113	M112	0.635417	0.439578	0.88002	0.966102
114	M113	0.552083	0.208326	0.810453	0.745763
115	M114	0.703125	0.30902	0.851477	0
116	M115	0.541667	0.428175	0.79229	0.81356
117	M116	0.0520833	0.829804	0.355122	0
118	M117	0.0416667	0.324646	0.836278	0.237288
119	M118	0.677083	0.451463	0.850859	0.822034
120	M119	0.755208	0.473002	0.867046	0.915254
121	M120	0.765625	0.358371	0.787841	0.677966
122	M121	0.510417	0.226244	0.828988	0.881356
123	M122	0.96875	0.422443	0.295317	0.762712
124	M123	0.489583	0.323861	0.8516	0.898305
125	M124	0.791667	0.568507	0.84987	0.779661
126	M125	0.479167	0.328808	0.798962	0.932204
127	M126	0.53125	0.507632	0.723835	0.762712
128	M127	0.526042	0.52006	0.822686	0.79661
129	M128	0.619792	0.446998	0.815272	0.847458
130	M129	0.78125	0.320302	0.811318	0.762712
131	M130	0.479167	0.381237	0.88002	0.81356
132	M131	0.520833	0.429925	0.852218	0.898305
133	M132	0.947917	0.808205	0.394786	0.898305
134	M133	0.802083	0.460513	0.786976	0.79661
135	M134	0.625	0.481388	0.286297	0.79661
136	M135	0.567708	0.45448	0.877672	0.932204
137	M136	0.520833	0.464012	0.856296	0.677966
138	M137	0.833333	0.383952	0.818114	0.677966
139	M138	0.630208	0.434268	0.841097	0.81356
140	M139	0.463542	0.259125	0.756827	0.881356
141	M140	0.5	0.284465	0.772396	0.847458
142	M141	0.546875	0.461116	0.80168	0.81356
143	M142	0.0625	0	0.91227	0.81356
144	M143	0.453125	0.56187	1	0.79661
145	M144	0.563616	0.546012	0.701083	0.5108
146	M145	0	0.550743	0.664702	0.426898
147	M146	0.225446	0.532196	0.764749	0.361755
148	M147	0.676339	0.532858	0.434401	0.517969
149	M148	0.60119	0.494439	0.440031	0.51762
150	M149	0.901786	0.606764	0.414478	0.791806
151	M150	0.0751488	0.488004	0.52676	0.46951
152	M151	0.488467	0.497751	0.673689	0.783499
153	M152	0.563616	0.522165	0.512251	0.839168
154	M153	0	0.528978	0.673689	0.474326
155	M154	0.413318	0.481569	0.60147	0.594858
156	M155	0.676339	0.456871	0.452591	0.515367
157	M156	0.60119	0.541942	0.54809	0.861116
158	M157	0.526042	0.53371	0.837401	0.882845
159	M158	0.563616	0.517055	0.727719	0.867675
160	M159	0.0751488	0.525666	0.69123	0.444218
161	M160	0.413318	0.526802	0.801671	0.848604
162	M161	0.33817	0.501441	0.780124	0.781682
163	M162	0	0.545444	0.629188	0.337321
164	M163	0.676339	0.511756	0.731616	0.506203
165	M164	0	0.453085	0.598546	0.436915
166	M165	0.563616	0.44542	0.664594	0.548811
167	M166	0.526042	0.538914	0.548956	0.503306
168	M167	0.33817	0.443055	0.721872	0.515594
169	M168	0.676339	0.485922	0.57256	0.501629
170	M169	0.300595	0.546769	0.758036	0.622436
171	M170	0.375744	0.460656	0.676504	0.726463
172	M171	0.676339	0.532006	0.676288	0.539013
173	M172	0.413318	0.534372	0.68116	0.840024
174	M173	0.450893	0.517244	0.85007	0.762191
175	M174	0	0.483272	0.603094	0.306432
176	M175	0.526042	0.482042	0.439598	0.699735
177	M176	0.0375744	0.510904	0.555561	0.311803
178	M177	0.60119	0.494155	0.453132	0.579473
179	M178	0	0.503807	0.741145	0.290749
180	M179	0.0375744	0.480339	0.552421	0.357882
181	M180	0	0.663352	0.700541	0.384384
182	M181	0	0.609886	0.783047	0.241765
183	M182	0	0.546769	0.635685	0.416899
184	M183	0.676339	0.469362	0.493302	0.556653
185	M184	0.225446	0.595597	0.819861	0.264969
186	M185	0.0375744	0.556326	0.800588	0.247407
187	M186	0.0375744	0.490275	0.656149	0.283801
188	M187	0.0375744	0.648117	0.768647	0.0919547
189	M188	0	0.662122	0.904965	0.180832
190	M189	0	0.583769	0.738221	0.451436
191	M190	0.488467	0.516203	0.510843	0.500208
192	M191	0.413318	0.447124	0.729343	0.59601
193	M192	0.225446	0.593989	0.75024	0.492987
194	M193	0.450893	0.481285	0.636334	0.515978
195	M194	0.375744	0.525193	0.707255	0.867031
196	M195	0.563616	0.508444	0.679428	0.826386
197	M196	0.488467	0.430469	0.784455	0.802761
198	M197	0.488467	0.405298	0.595298	0.758384
199	M198	0.526042	0.450152	0.748507	0.872534
200	M199	0.676339	0.338395	0.88082	0.603952
201	M200	0.563616	0.387697	0.78478	0.827399
202	M201	0.488467	0.507687	0.561083	0.841747
203	M202	0.375744	0.500022	0.715159	0.746
204	M203	0	0.517717	0.63536	0.491749
205	M204	0.563616	0.473809	0.69307	0.829378
206	M205	0.676339	0.49406	0.611756	0.814428
207	M206	0.526042	0.482704	0.704764	0.771531
208	M207	0.563616	0.497183	0.623449	0.511779
209	M208	0.563616	0.470119	0.60396	0.699892
210	M209	0.300595	0.538157	0.743743	0.82242
211	M210	0.526042	0.532858	0.769296	0.573558
212	M211	0.563616	0.531533	0.500232	0.546606
213	M212	0.450893	0.433308	0.551121	0.614785
214	M213	0.676339	0.530776	0.630162	0.886039
215	M214	0.563616	0.439553	0.73519	0.768581
216	M215	0.563616	0.42129	0.75901	0.500659
217	M216	0.526042	0.495669	0.526435	0.542211
218	M217	0.488467	0.411543	0.752947	0.741317
219	M218	0.450893	0.519421	0.754787	0.704023
220	M219	0.450893	0.523111	0.7314	0.806325
221	M220	0.413318	0.35628	0.812282	0.793751
222	M221	0.413318	0.434443	0.702274	0.805644
223	M222	0.488467	0.468794	0.632436	0.781312
224	M223	0.563616	0.500589	0.425197	0.505554
225	M224	0.526042	0.526991	0.670657	0.784991
226	M225	0.488467	0.535318	0.686574	0.767309
227	M226	0.60119	0.492262	0.636767	0.51422
228	M227	0.563616	0.547904	0.53174	0.813317
229	M228	0.676339	0.417694	0.568879	0.528245
230	M229	0.450893	0.545633	0.646404	0.535897
231	M230	0.375744	0.523395	0.596814	0.501761
232	M231	0.488467	0.5004	0.631462	0.768707
233	M232	0.526042	0.531249	0.50662	0.531594
234	M233	0	0.461507	0.734107	0.270328
235	M234	0.563616	0.50551	0.514958	0.552215
236	M235	0.638765	0.42905	0.546682	0.515081
237	M236	0	0.538536	0.542026	0.369247
238	M237	0.563616	0.474377	0.601036	0.502944
239	M238	0.112723	0.453464	0.567146	0.422596
240	M239	0.187872	0.515446	0.636984	0.444368
241	M240	0	0.521408	0.668925	0.462701
242	M241	0.60119	0.169008	0.940804	0.74539
243	M242	0	0.509011	0.587935	0.310202
244	M243	0.676339	0.372556	0.647595	0.529942
245	M244	0.60119	0.499265	0.567038	0.507781
246	M245	0.225446	0.479676	0.617603	0.405217
247	M246	0	0.535508	0.541377	0.453572
248	M247	0.0751488	0.494533	0.570394	0.334127
249	M248	0	0.569764	0.836752	0.289288
250	M249	0	0.542226	0.746775	0.336487
251	M250	0	0.574211	0.612838	0.389718
252	M251	0.60119	0.614429	0.449343	0.577752
253	M252	0.112723	0.484786	0.808492	0.362728
254	M253	0.300595	0.454221	0.727177	0.633809
255	M254	0	0.506646	0.514524	0.435976
256	M255	0.60119	0.485733	0.640016	0.500976
257	M256	0.563616	0.513081	0.777417	0.651483
258	M257	0.676339	0.357888	0.667301	0.545552
259	M258	0.263021	0.405108	0.60959	0.674548
260	M259	0.60119	0.494722	0.514741	0.526403
261	M260	0.526042	0.542605	0.475004	0.686794
262	M261	0.187872	0.502387	0.620743	0.414287
263	M262	0	0.527464	0.659613	0.364784
264	M263	0.563616	0.475134	0.559675	0.514486
265	M264	0.263021	0.54393	0.546682	0.547762
266	M265	0.187872	0.452234	0.634385	0.466637
267	M266	0.526042	0.527843	0.462552	0.56138
268	M267	0.0375744	0.470876	0.767889	0.0750616
269	M268	0.0751488	0.537873	0.857866	0.343313
270	M269	0.225446	0.533804	0.645754	0.392742
271	M270	0.488467	0.54904	0.855917	0.817301
272	M271	0.563616	0.502103	0.815422	0.699181
273	M272	0.187872	0.555191	0.77471	0.213308
274	M273	0.150298	0.581971	0.717541	0.248911
275	M274	0.150298	0.480339	0.77536	0.303671
276	M275	0.60119	0.476554	0.863712	0.771658
277	M276	0.33817	0.539671	0.72577	0.860131
278	M277	0.0751488	0.495479	0.723063	0.427468
279	M278	0.112723	0.52472	0.581439	0.310497
280	M279	0.375744	0.545254	0.750781	0.863992
281	M280	0.0751488	0.56948	0.540186	0.43095
282	M281	0.33817	0.540239	0.723063	0.858999
283	M282	0.187872	0.450247	0.570936	0.418786
284	M283	0.526042	0.467848	0.773952	0.831176
285	M284	0.112723	0.459047	0.562057	0.37396
286	M285	0.112723	0.492167	0.540944	0.439055
287	M286	0.60119	0.486395	0.695019	0.507356
288	M287	0.225446	0.477973	0.597896	0.378534
289	M288	0.112723	0.561815	0.509327	0.470465
290	M289	0	0.471538	0.686141	0.304064
291	M290	0.526042	0.608751	0.423465	0.737308
292	M291	0.112723	0.55396	0.548631	0.420713
293	M292	0.263021	0.533426	0.648244	0.512105
294	M293	0.112723	0.562288	0.825708	0.383258
295	M294	0.150298	0.515257	0.64727	0.266009
296	M295	0.563616	0.408704	0.693937	0.774424
297	M296	0.187872	0.47873	0.684625	0.400889
298	M297	0.526042	0.433308	0.606125	0.794155
299	M298	0.150298	0.495669	0.641098	0.432573
300	M299	0.60119	0.513175	0.525785	0.666996
301	M300	0.187872	0.490275	0.570503	0.482517
302	M301	0.526042	0.618498	0.26116	0.721684
303	M302	0	0.539293	0.763449	0.269093
304	M303	0	0.48507	0.631462	0.30779
305	M304	0	0.476837	0.52925	0.254947
306	M305	0.150298	0.53759	0.615329	0.355258
307	M306	0.263021	0.440689	0.727069	0.851994
308	M307	0.187872	0.467753	0.787703	0.305085
309	M308	0.375744	0.532006	0.729126	0.867718
310	M309	0.375744	0.515635	0.713751	0.504364
311	M310	0.413318	0.467469	0.772328	0.800731
312	M311	0.225446	0.568723	0.69307	0.289761
313	M312	0	0.457249	0.733999	0.232474
314	M313	0	0.466901	0.729343	0.194407
315	M314	0	0.502293	0.596705	0.384973
316	M315	0.150298	0.472485	0.647595	0.372955
317	M316	0.413318	0.496899	0.557293	0.829328
318	M317	0.0751488	0.503334	0.562815	0.306681
319	M318	0	0.505889	0.76215	0.335486
320	M319	0	0.539198	0.603527	0.311236
321	M320	0.526042	0.52737	0.644238	0.792963
322	M321	0.488467	0.424602	0.735947	0.770805
323	M322	0.563616	0.439175	0.746775	0.526629
324	M323	0	0.534183	0.561408	0.471116
325	M324	0.563616	0.475418	0.61652	0.796819
326	M325	0.263021	0.478352	0.733024	0.799072
327	M326	0.0375744	0.588027	0.721763	0.464266
328	M327	0	0.456492	0.55123	0.242615
329	M328	0.563616	0.463495	0.74959	0.723831
330	M329	0.450893	0.379369	0.745692	0.71425
331	M330	0.488467	0.489139	0.696427	0.7344
332	M331	0.526042	0.428387	0.858732	0.779934
333	M332	0.563616	0.505699	0.738005	0.782208
334	M333	0.526042	0.482515	0.783156	0.755266
335	M334	0.488467	0.465009	0.785862	0.832009
336	M335	0.488467	0.452328	0.748183	0.615627
337	M336	0	0.454505	0.756953	0.352591
338	M337	0.638765	0.521029	0.729126	0.679216
339	M338	0.676339	0.479582	0.801887	0.832563
340	M339	0.676339	0.458385	0.772761	0.764372
341	M340	0.676339	0.461034	0.705089	0.749635
342	M341	0.563616	0.501346	0.691338	0.902845
343	M342	0.413318	0.477689	0.736489	0.527199
344	M343	0.488467	0.502482	0.571694	0.510011
345	M344	0.60119	0.537779	0.770054	0.748502
346	M345	0.263021	0.547904	0.680077	0.822217
347	M346	0.0751488	0.538347	0.580572	0.286828
348	M347	0.488467	0.149325	0.536721	0.512605
349	M348	0.300595	0.497656	0.595081	0.537327
350	M349	0.375744	0.485827	0.641098	0.826026
351	M350	0.526042	0.493776	0.327966	0.514324
352	M351	0.375744	0.531439	0.766806	0.883034
353	M352	0.300595	0.368676	0.742444	0.8795
354	M353	0.60119	0.503807	0.718732	0.861797
355	M354	0.375744	0.377382	0.624099	0.760244
356	M355	0.488467	0.367824	0.638825	0.832742
357	M356	0.488467	0.393942	0.723712	0.656525
358	M357	0.375744	0.51819	0.602552	0.675658
359	M358	0.300595	0.506078	0.641856	0.613623
360	M359	0.263021	0.464725	0.685924	0.862451
361	M360	0.450893	0.470876	0.708987	0.813632
362	M361	0.526042	0.408799	0.762475	0.717013
363	M362	0.563616	0.334042	0.756845	0.906452
364	M363	0.375744	0.410786	0.607966	0.565625
365	M364	0.375744	0.0697419	0.630487	0.603157
366	M365	0.300595	0.46217	0.656149	0.739918
367	M366	0.300595	0.423277	0.58512	0.556642
368	M367	0.60119	0.509011	0.450209	0.597658
369	M368	0.60119	0.311709	0.592266	0.764035
370	M369	0.413318	0.542889	0.615654	0.844697
371	M370	0.263021	0.393753	0.664486	0.614278
372	M371	0.33817	0.543078	0.588476	0.710566
373	M372	0.375744	0.410975	0.642181	0.802922
374	M373	0.33817	0.44949	0.763233	0.791157
375	M374	0	0.573549	0.511818	0.407503
376	M375	0.300595	0.506835	0.685058	0.879081
377	M376	0.375744	0.524815	0.646837	0.55179
378	M377	0.488467	0.472579	0.617603	0.749399
379	M378	0.33817	0.518853	0.623449	0.855772
380	M379	0.33817	0.48119	0.648244	0.857838
381	M380	0.300595	0.4493	0.652575	0.851744
382	M381	0.33817	0.514878	0.601036	0.647876
383	M382	0.488467	0.541753	0.64976	0.816941
384	M383	0.488467	0.399052	0.687115	0.676908
385	M384	0.413318	0.531533	0.73205	0.762856
386	M385	0.563616	0.499832	0.535746	0.752569
387	M386	0.563616	0.443055	0.750132	0.713786
388	M387	0.676339	0.428766	0.599845	0.594389
389	M388	0.450893	0.538347	0.665893	0.51638
390	M389	0.375744	0.512513	0.526651	0.521281
391	M390	0.526042	0.363566	0.669683	0.692332
392	M391	0.638765	0.0346344	0.689389	0.671224
393	M392	0.526042	0.566451	0.499691	0.532727
394	M393	0.638765	0.496804	0.77222	0.826462
395	M394	0.300595	0.156801	0.620959	0.525731
396	M395	0.450893	0.511566	0.69307	0.583352
397	M396	0.450893	0.537684	0.681052	0.529965
398	M397	0.638765	0.517055	0.638608	0.803103
399	M398	0.375744	0.162479	0.67867	0.674032
400	M399	0.375744	0.480149	0.763125	0.687984
401	M400	0.450893	0.543551	0.757711	0.815916
402	M401	0	0.551973	0.635901	0.471003
403	M402	0.676339	0.20298	0.715375	0.779664
404	M403	0.33817	0.379275	0.695777	0.64461
405	M404	0.300595	0.339152	0.662753	0.696052
406	M405	0.375744	0.418735	0.627672	0.833539
407	M406	0.33817	0.500495	0.651493	0.689371
408	M407	0.375744	0.478446	0.613596	0.87282
409	M408	0.33817	0.536738	0.593782	0.595795
410	M409	0.638765	0.508065	0.6686	0.812746
411	M410	0.638765	0.535224	0.634493	0.525066
412	M411	0.563616	0.521029	0.574726	0.537702
413	M412	0.263021	0.514595	0.51918	0.877754
414	M413	0.488467	0.419492	0.639474	0.62533
415	M414	0.563616	0.577334	0.392065	0.529231
416	M415	0.33817	0.0797726	0.691338	0.659176
417	M416	0.112723	0.591528	0.667626	0.432573
418	M417	0.263021	0.185757	0.657448	0.568617
419	M418	0.187872	0.510715	0.550472	0.480381
420	M419	0.375744	0.372272	0.592807	0.829808
421	M420	0.526042	0.42886	0.643805	0.783803
422	M421	0.676339	0.500684	0.76594	0.805913
423	M422	0.187872	0.512418	0.560758	0.410098
424	M423	0.300595	0.271113	0.713968	0.746928
425	M424	0.112723	0.6026	0.714942	0.206277
426	M425	0.526042	0.460656	0.431044	0.662734
427	M426	0.60119	0.460088	0.833179	0.776788
428	M427	0.375744	0.474661	0.524269	0.806718
429	M428	0.375744	0.426305	0.694045	0.738398
430	M429	0.526042	0.451855	0.657015	0.779875
431	M430	0.563616	0.511756	0.262893	0.815248
432	M431	0.563616	0.544214	0.502181	0.7431
433	M432	0.413318	0.418546	0.657881	0.541498
434	M433	0.375744	0.464252	0.664919	0.71184
435	M434	0.526042	0.410786	0.568879	0.809377
436	M435	0.526042	0.521029	0.633736	0.775335
437	M436	0.450893	0.400755	0.643047	0.784203
438	M437	0.563616	0.517812	0.586203	0.84826
439	M438	0.60119	0.479014	0.64413	0.794109
440	M439	0.33817	0.19011	0.578407	0.681566
441	M440	0.676339	0.396402	0.747533	0.820532
442	M441	0.263021	0.277832	0.712885	0.741403
443	M442	0.33817	0.498886	0.659613	0.638834
444	M443	0.526042	0.45829	0.424764	0.802852
445	M444	0.526042	0.60771	0.627889	0.485878
446	M445	0.413318	0.717669	0.562815	0.412019
447	M446	0.676339	0.726281	0.728693	0.478473
448	M447	0.488467	0.599004	0.778716	0.464604
449	M448	0.187872	0.713127	0.564656	0.567454
450	M449	0.33817	0.609886	0.683001	0.512317
451	M450	0.638765	0.65228	0.634602	0.498579
452	M451	0.713914	0.525193	0.714509	0.924029
453	M452	0.676339	0.475134	0.506079	0.454195
454	M453	0.676339	0.579321	0.601361	0.870386
455	M454	0.563616	0.43662	0.714509	0.465391
456	M455	0.713914	0.525193	0.589668	0.537155
457	M456	0.713914	0.368108	0.684084	0.550573
458	M457	0	0.501441	0.503589	0.651562
459	M458	0.187872	0.431131	0.668817	0.466763
460	M459	0.789062	0.602505	0.630487	0.432527
461	M460	0.413318	0.63184	0.649002	0.517357
462	M461	0.33817	0.544497	0.629621	0.452378
463	M462	0.789062	0.483651	0.878979	0.482572
464	M463	0.187872	0.521029	0.821918	0.781266
465	M464	0.225446	0.471538	0.828848	0.810655
466	M465	0.676339	0.49283	0.699784	0.415049
467	M466	0.976935	0.554528	0.886125	0.792102
468	M467	0.526042	0.631746	0.732591	0.481177
469	M468	0.563616	0.599193	0.654849	0.459969
470	M469	0.789062	0.453843	0.550797	0.501703
471	M470	0.33817	0.604209	0.710936	0.454416
472	M471	0.413318	0.610549	0.706497	0.469622
473	M472	0.225446	0.491221	0.94546	0.845319
474	M473	0.751488	0.574306	0.784238	0.489048
475	M474	0.826637	0.563991	0.545816	0.475025
476	M475	0.751488	0.552825	0.945027	0.871184
477	M476	0.676339	0.499643	0.650843	0.49504
478	M477	0.300595	0.572981	0.730642	0.815907
479	M478	0.901786	0.495385	0.192297	0.129606
480	M479	0.901786	0.0871537	0.319087	0.239639
481	M480	0.49	0.9138	0.8793	0.8631
482	M481	0.5277	0.7665	0.8525	0.2249
483	M482	0.0377	0.5799	0.4766	0.1536
484	M483	0.7162	0.5252	0.7145	0.924
485	M484	0.1885	0.4006	0.3448	0.0504
486	M485	0.9206	0.4665	0.4372	0.2426
487	M486	0.5277	0.9321	0.9554	0.3191
488	M487	0.7539	0.6706	0.8768	0.4176
489	M488	0	0.5269	0.4311	0.4238
490	M489	0.4523	0.6719	0.9467	0.3005
491	M490	0.6031	0.6352	0.4225	0.8586
492	M491	0.6031	0.5346	0.4531	0.3208
493	M492	0.957	0.1614	0.6954	0.4029
494	M493	0.9062	0.0083	0.5821	0.395
495	M494	0.7539	0.4871	0.954	0.7936
496	M495	0.4146	0.7551	0.0798	0.3941
497	M496	0.3769	0.4704	0.9558	0.3437
498	M497	0.1885	0.0167	0.5234	0.2873
499	M498	0.3393	0.011	0.2522	0.4392
500	M499	0.3016	0.6186	0.9542	0.3965
501	M500	0.3393	0.438	0.9427	0.3977
502	M501	0	0.4789	0.2907	0.8952
503	M502	0.2262	0.9589	0.2834	0.2364
504	M503	0.6408	0.7815	0.7094	0.4535
505	M504	0.1885	0.5141	0.4317	0.4264
506	M505	0.49	0.5108	0.509	0.0379
507	M506	0.1885	0.5826	0.5246	0.357
508	M507	0.4523	0.499	0.6673	0.3545
509	M508	0.4523	0.0039	0.5345	0.1828
510	M509	0.867	0.0129	0.4699	0.3053
511	M510	0.49	0.4881	0.771	0.0518
512	M511	0.49	0.4885	0.0051	0.2921
513	M512	0.3016	0.638	0.7111	0.9027
514	M513	0.5654	0.334	0.7569	0.9064
515	M514	0.1885	0.4682	0.6663	0.7521
516	M515	0	0.5806	0.0649	0.5632
517	M516	0	0.5192	0.0171	0.4244
518	M517	0.6785	0.4436	0.031	0.3785
519	M518	0.49	0.5878	0.6564	0.9399
520	M519	0.4523	0.5661	0.6962	0.3204
521	M520	0.3769	0.1243	0	0.2391
522	M521	0.3393	0.0104	0.1639	0.3084
523	M522	0	0.2054	0.008	0.4319
524	M523	0.49	0.0142	0.1293	0.44
525	M524	0.6031	0.1124	0.3815	0.2845
526	M525	0.1508	0.1813	0.0126	0.3977
527	M526	0.4523	0.3947	0.3011	0.2062
528	M527	0	0.4407	0.3676	0.2161
529	M528	0.4146	0.4614	0.2041	0.917
530	M529	0	0.4971	0.0744	0.4698
531	M530	0	0.1329	0.0538	0.3366
532	M531	0.7916	0.5137	0.2713	0.0441
533	M532	0.9685	0.2565	0.1401	0.2322
534	M533	0.7139	0.3329	0.8281	0.4026
535	M534	0.2254	0.4206	0.8988	0.3941
536	M535	0.2254	0.2122	0.347	0.3029
537	M536	0.8266	0.4145	0.2373	0.4713
538	M537	0.8642	0.4594	0.8346	0.3755
539	M538	0.5636	0.4366	0.7145	0.4654
540	M539	0.6387	0.4695	0.3149	0.3223
541	M540	0.9017	0.4952	0.4584	0.064
542	M541	0.0376	0.5893	0.5683	0.109
543	M542	0.0376	0.5109	0.5556	0.3118
544	M543	0.8266	0.3802	0.8083	0.3606
545	M544	0.6012	0.478	0.7439	0.1899
546	M545	0.8642	0.4689	0.9421	0.4163
547	M546	0.3006	0.5474	0.3236	0.4723
548	M547	0.789	0.4836	0.879	0.4826
549	M548	0.8642	0.4699	0.5448	0.3781
550	M549	0.8266	0.372	0.0625	0.5275
551	M550	0.3382	0.6103	0.4362	0.226
552	M551	0.4133	0.429	0.3274	0.2415
553	M552	0.3006	0.5299	0.489	0.4343
554	M553	0.6387	0.3519	0.6517	0.3585
555	M554	0.0376	0.3914	0.2606	0.3116
556	M555	0.6763	0.4996	0.6509	0.495
557	M556	0.1503	0.4095	0.2657	0.4321
558	M557	0.0376	0.5222	0.4803	0.4857
559	M558	0.3757	0.563	0.5403	0.4812
560	M559	0.6763	0.4928	0.6998	0.415
561	M560	0.8266	0.4565	0.7442	0.3186
562	M561	0.789	0.4947	0.4264	0.2485
563	M562	0.9769	0.4623	0.535	0.251
564	M563	0.526	0.4573	0.4988	0.4099
565	M564	0.526	0.5412	0.4945	0.2051
566	M565	0.3382	0.6178	0.5403	0.0669
567	M566	0.263	0.5617	0.3519	0.1825
568	M567	0.4884	0.4895	0.4207	0.1334
569	M568	0.4509	0.6172	0.4137	0.3607
570	M569	0.3382	0.5091	0.4915	0.3796
571	M570	0.7514	0.4996	0.4225	0.3302
572	M571	0.4133	0.7176	0.5628	0.412
573	M572	0.7139	0.3681	0.6841	0.5506
574	M573	0.9017	0.3947	0.6292	0.375
575	M574	0.8642	0.3826	0.3805	0.4683
576	M575	0.4133	0.4778	0.7655	0.4909
577	M576	0.0751	0.488	0.5268	0.4695
578	M577	0.0376	0.62	0.5051	0.3635
579	M578	0.1127	0.3207	0.8188	0.423
580	M579	0.9017	0.4816	0.5499	0.3673
581	M580	0.9017	0.454	0.6248	0.4916
582	M581	0.8266	0.3972	0.7378	0.5756
583	M582	0.6763	0.4313	0.6737	0.4061
584	M583	0.9017	0.4992	0.6234	0.3363
585	M584	0.2254	0.5744	0.5139	0.1231
586	M585	0.3382	0.4929	0.6761	0.4729
587	M586	0.3382	0.5193	0.4212	0.1902
588	M587	0.1879	0.5073	0.5387	0.0877
589	M588	0.789	0.4776	0.4769	0.3557
590	M589	0.7139	0.4774	0.4615	0.4867
591	M590	0.3382	0.4921	0.5791	0.3509
592	M591	0.3006	0.4844	0.6711	0.3823
593	M592	0.0376	0.4687	0.472	0.4353
594	M593	0.2254	0.5054	0.3536	0.3785
595	M594	0.263	0.5633	0.5597	0.3429
596	M595	0.8266	0.2406	0.6524	0.4865
597	M596	0.6763	0.2742	0.8486	0.4232
598	M597	0.6012	0.3749	0.4033	0.5899
599	M598	0.6763	0.4751	0.5061	0.4542
600	M599	0.4133	0.5348	0.3409	0.4963
601	M600	0.6763	0.4641	0.4956	0.3316
602	M601	0.0376	0.536	0.4128	0.3082
603	M602	0.6763	0.489	0.4182	0.1733
604	M603	0.4884	0.5604	0.5339	0.1797
605	M604	0.3006	0.457	0.6061	0.2241
606	M605	0.263	0.4994	0.3946	0.3222
607	M606	0.0376	0.4803	0.5524	0.3579
608	M607	0.4884	0.4947	0.5894	0.4997
609	M608	0.9769	0.3382	0.6739	0.3391
610	M609	0.1879	0.5225	0.4783	0.4914
611	M610	0.1503	0.5358	0.5925	0.4115
612	M611	0.5636	0.4396	0.3582	0.4211
613	M612	0.3006	0.6393	0.5772	0.3846
614	M613	0.1879	0.5812	0.4076	0.3801
615	M614	0.789	0.4941	0.6467	0.3383
616	M615	0.2254	0.5542	0.396	0.4382
617	M616	0.6763	0.446	0.6222	0.3017
618	M617	0.263	0.5042	0.5464	0.2535
619	M618	0.2254	0.541	0.5612	0.2091
620	M619	0.6012	0.4643	0.7469	0.3135
621	M620	0.0376	0.4902	0.6562	0.2838
622	M621	0.1879	0.3863	0.3091	0.3129
623	M622	0.9769	0.4556	0.656	0.2965
624	M623	0.263	0.5064	0.5614	0.4419
625	M624	0.4509	0.4753	0.4659	0.2976
626	M625	0.6012	0.4438	0.4932	0.3267
627	M626	0.6387	0.467	0.5912	0.346
628	M627	0.263	0.4668	0.5598	0.4733
629	M628	0.4133	0.4487	0.4304	0.3802
630	M629	0.3757	0.5028	0.1809	0.3694
631	M630	0.526	0.515	0.2994	0.3752
632	M631	0.3382	0.4556	0.7577	0.4351
633	M632	0.4509	0.4461	0.8463	0.3414
634	M633	0.263	0.6506	0.3483	0.489
635	M634	0.526	0.5088	0.4179	0.4507
636	M635	0.5636	0.5477	0.2912	0.2735
637	M636	0.3006	0.4892	0.7147	0.2341
638	M637	0.0376	0.605	0.2757	0.3058
639	M638	0.3757	0.4974	0.457	0.1739
640	M639	0.2254	0.5144	0.4895	0.1673
641	M640	0.526	0.4688	0.6045	0.1987
642	M641	0.5636	0.4845	0.4687	0.2063
643	M642	0.5636	0.4997	0.7315	0.4499
644	M643	0.6763	0.4055	0.7578	0.2236
645	M644	0.6387	0.4722	0.5813	0.3279
646	M645	0.1879	0.4311	0.6688	0.4668
647	M646	0.8642	0.4259	0.7579	0.3364
648	M647	0.0751	0.4583	0.4734	0.4719
649	M648	0.3757	0.6259	0.4107	0.3828
650	M649	0.0376	0.5094	0.201	0.2087
651	M650	0.3382	0.6142	0.5922	0.1706
652	M651	0.4133	0.4943	0.7431	0.3413
653	M652	0.9017	0.4837	0.8416	0.3088
654	M653	0.5636	0.4286	0.5244	0.3307
655	M654	0.526	0.4375	0.4443	0.4215
656	M655	0.5636	0.47	0.7125	0.4298
657	M656	0.5636	0.4777	0.6872	0.3765
658	M657	0.4509	0.425	0.5223	0.4201
659	M658	0.4133	0.4317	0.5235	0.4039
660	M659	0.4884	0.1976	0.5192	0.3922
661	M660	0.4509	0.4116	0.5588	0.42
662	M661	0.8642	0.1759	0.5325	0.3413
663	M662	0.3006	0.4922	0.7551	0.4587
664	M663	0.3757	0.5411	0.3784	0.4769
665	M664	0.5636	0.4771	0.6016	0.447
666	M665	0.526	0.453	0.5119	0.3627
667	M666	0.789	0.4594	0.1884	0.3274
668	M667	0.4884	0.5234	0.5429	0.2785
669	M668	0.4884	0.4107	0.746	0.2805
670	M669	0.4133	0.4769	0.6656	0.3724
671	M670	0.4133	0.3563	0.8123	0.7937
672	M671	0.526	0.3954	0.5307	0.485
673	M672	0.5636	0.3843	0.4584	0.4334
674	M673	0.8266	0.409	0.0906	0.3606
675	M674	0.526	0.4583	0.7224	0.4334
676	M675	0.3757	0.5085	0.5634	0.3537
677	M676	0.4509	0.4395	0.4629	0.4733
678	M677	0.3757	0.4433	0.5353	0.4069
679	M678	0.4133	0.2349	0.7993	0.4312
680	M679	0.4133	0.4434	0.8878	0.4207
681	M680	0.263	0.4604	0.5164	0.4597
682	M681	0.7139	0.3282	0.1698	0.485
683	M682	0.6387	0.2692	0.536	0.4871
684	M683	0.4509	0.5386	0.2238	0.3824
685	M684	0.3757	0.5586	0.4936	0.4853
686	M685	0.3757	0.5514	0.303	0.4357
687	M686	0.5636	0.5341	0.4498	0.4201
688	M687	0.5636	0.5053	0.3078	0.4597
689	M688	0.3757	0.5902	0.2433	0.33
690	M689	0.4509	0.4606	0.1107	0.434
691	M690	0.3757	0.5578	0.2655	0.3766
692	M691	0.7139	0.4434	0.6706	0.3736
693	M692	0.8266	0.4354	0.4281	0.3311
694	M693	0.3757	0.4594	0.4226	0.4793
695	M694	0.6387	0.48	0.6677	0.4716
696	M695	0.4509	0.4038	0.4635	0.4926
697	M696	0.4509	0.3814	0.4433	0.4645
698	M697	0.7514	0.4652	0.7588	0.4969
699	M698	0.6387	0.3368	0.4672	0.7503
700	M699	0.6012	0.4869	0.8265	0.4551
701	M700	0.5636	0.4752	0.7128	0.4919
702	M701	0.4133	0.4952	0.3406	0.4735
703	M702	0.4509	0.4569	0.449	0.4988
704	M703	0.526	0.3623	0.5667	0.3733
705	M704	0.6763	0.1805	0.6415	0.4325
706	M705	0.6387	0.3478	0.7896	0.477
707	M706	0.4884	0.6817	0.4085	0.3665
708	M707	0.5636	0.4023	0.3218	0.4497
709	M708	0.3757	0.6519	0.4993	0.4495
710	M709	0.9393	0.3091	0.1237	0.4253
711	M710	0.789	0.3916	0.3138	0.4295
712	M711	0.4884	0.4944	0.6093	0.4709
713	M712	0.263	0.5728	0.5691	0.2112
714	M713	0.5636	0.5111	0.4038	0.4567
715	M714	0.4509	0.491	0.4436	0.441
716	M715	0.5636	0.4478	0.7755	0.3657
717	M716	0.9769	0.3547	0.6598	0.3758
718	M717	0.4509	0.4507	0.2723	0.4547
719	M718	0.6012	0.4857	0.2121	0.4678
720	M719	0.526	0.4468	0.4299	0.4433
721	M720	0.526	0.4466	0.5124	0.4609
722	M721	0.7514	0.4579	0.5032	0.4563
723	M722	0.6012	0.3903	0.5167	0.4057
724	M723	0.7514	0.2439	0.6972	0.6255
725	M724	0.4509	0.4582	0.4452	0.3607
726	M725	0.5636	0.4843	0.5308	0.405
727	M726	0.4509	0.4944	0.408	0.429
728	M727	0.4884	0.4634	0.527	0.4021
729	M728	0.3757	0.377	0.7112	0.4265
730	M729	0.6387	0.4015	0.5667	0.4853
731	M730	0.6012	0.4134	0.4831	0.4337
732	M731	0.4509	0.4895	0.229	0.3976
733	M732	0.3006	0.5309	0.3693	0.4512
734	M733	0.5636	0.3807	0.6697	0.4627
735	M734	0.789	0.4984	0.463	0.3584
736	M735	0.4884	0.5	0.253	0.3366
737	M736	0.3757	0.4151	0.4704	0.3012
738	M737	0.4133	0.4877	0.2032	0.388
739	M738	0.3757	0.5075	0.5156	0.3919
740	M739	0.4133	0.4276	0.5433	0.3471
741	M740	0.8266	0.4392	0.5702	0.3899
742	M741	0.4509	0.5284	0.4775	0.428
743	M742	0.8266	0.4283	0.4163	0.4369
744	M743	0.5636	0.4974	0.6686	0.4146
745	M744	0.6763	0.4548	0.746	0.4869
746	M745	0.6387	0.496	0.646	0.4832
747	M746	0.526	0.1416	0.4721	0.3919
748	M747	0.5636	0.513	0.4681	0.4495
749	M748	0.7514	0.3568	0.8119	0.8501
750	M749	0.3382	0.6815	0.5502	0.3477
751	M750	0.5636	0.5302	0.4498	0.4371
752	M751	0.789	0.4971	0.2929	0.3379
753	M752	0.8642	0.4125	0.7002	0.3798
754	M753	0.7139	0.4991	0.7711	0.4019
755	M754	0.4133	0.3505	0.2981	0.3541
756	M755	0.5636	0.4803	0.2109	0.2904
757	M756	0.5636	0.4955	0.6598	0.4938
758	M757	0.9769	0.5	0.48	0.4855
759	M758	0.526	0.4995	0.615	0.4081
760	M759	0.4884	0.4526	0.345	0.4492
761	M760	0.789	0.0713	0.519	0.7773
762	M761	0.6763	0.3384	0.8808	0.6039
763	M762	0.526	0.5123	0.5074	0.4041
764	M763	0.5636	0.3877	0.7848	0.8274
765	M764	0.3757	0.6948	0.3075	0.2398
766	M765	0.3757	0.491	0.4338	0.4882
767	M766	0.5636	0.4626	0.5025	0.4802
768	M767	0.4884	0.505	0.4173	0.4746
769	M768	0.4509	0.5357	0.1494	0.3184
770	M769	0.4884	0.5001	0.2905	0.4099
771	M770	0.4133	0.4176	0.6885	0.3641
772	M771	0.5636	0.3242	0.7284	0.4005
773	M772	0.4509	0.563	0.2847	0.4857
774	M773	0.7514	0.487	0.4155	0.4517
775	M774	0.6763	0.4939	0.6221	0.4876
776	M775	0.4509	0.4847	0.5212	0.4582
777	M776	0.526	0.4626	0.3714	0.4053
778	M777	0.4509	0.4921	0.5258	0.461
779	M778	0.4133	0.4909	0.4082	0.4355
780	M779	0.4509	0.3557	0.533	0.3717
781	M780	0.4884	0.3422	0.6816	0.4787
782	M781	0.4133	0.4309	0.7455	0.3642
783	M782	0.526	0.2678	0.6356	0.4369
784	M783	0.4509	0.5423	0.383	0.4391
785	M784	0.4509	0.4808	0.3177	0.4239
786	M785	0.526	0.5694	0.2982	0.419
787	M786	0.7139	0.4255	0.5362	0.466
788	M787	0.4133	0.5242	0.3057	0.4889
789	M788	0.4884	0.5769	0.5655	0.391
790	M789	0.4884	0.5641	0.3657	0.3504
791	M790	0.5636	0.4838	0.7992	0.3901
792	M791	0.8642	0.3045	0.2866	0.302
793	M792	0.4509	0.6603	0.3543	0.4553
794	M793	0.9769	0.4591	0.4735	0.4498
795	M794	0.5636	0.5281	0.5087	0.4564
796	M795	0.526	0.4067	0.4405	0.487
797	M796	0.4133	0.5589	0.5744	0.4895
798	M797	0.4509	0.5737	0.4785	0.456
799	M798	0.4509	0.3647	0.7212	0.4051
800	M799	0.4884	0.5407	0.5698	0.4851
801	M800	0.5636	0.4515	0.749	0.4452
802	M801	0.6387	0.4071	0.5953	0.4233
803	M802	0.7139	0.183	0.8128	0.3458
804	M803	0.4133	0.6934	0.5153	0.3241
805	M804	0.4133	0.5448	0.5264	0.4597
806	M805	0.8642	0.3559	0.7472	0.8359
807	M806	0.4133	0.492	0.6136	0.4782
808	M807	0.3006	0.4713	0.6825	0.4677
809	M808	0.4509	0.4792	0.2332	0.3117
810	M809	0.4133	0.4639	0.9338	0.3962
811	M810	0.4509	0.5487	0.3048	0.4146
812	M811	0.4884	0.4887	0.6882	0.376
813	M812	0.6763	0.4956	0.6264	0.4119
814	M813	0.6012	0.4133	0.5459	0.3353
815	M814	0.4509	0.4742	0.6754	0.3995
816	M815	0.7514	0.4665	0.8866	0.4239
817	M816	0.4509	0.4108	0.4541	0.2509
818	M817	0.526	0.4327	0.8482	0.3116
819	M818	0.7514	0.3917	0.6933	0.3584
820	M819	0.6012	0.4613	0.4132	0.4079
821	M820	0.4884	0.0507	0.7705	0.3787
822	M821	0.526	0.4312	0.6791	0.3932
823	M822	0.9769	0.4807	0.534	0.4528
824	M823	0.6387	0.4484	0.6361	0.3817
825	M824	0.7139	0.4271	0.8012	0.4131
826	M825	0.4884	0.5749	0.3547	0.371
827	M826	0.3006	0.4494	0.8034	0.2894
828	M827	0.2254	0.4272	0.3796	0.3661
829	M828	0.3006	0.4634	0.7307	0.3612
830	M829	0.4133	0.4139	0.3708	0.3255
831	M830	0.3006	0.4477	0.6178	0.2862
832	M831	0.2254	0.4161	0.6449	0.3203
833	M832	0.5636	0.5373	0.3945	0.3914
834	M833	0.0376	0.4519	0.5057	0.3083
835	M834	0.526	0.4256	0.3064	0.2769
836	M835	0.6763	0.3947	0.4104	0.3733
837	M836	0.1503	0.5303	0.1003	0.3319
838	M837	0.6763	0.4894	0.5948	0.3539
839	M838	0.5636	0.4926	0.4639	0.3815
840	M839	0.263	0.3503	0.2721	0.4195
841	M840	0.7139	0.4844	0.3641	0.3048
842	M841	0.1879	0.3018	0.3895	0.4804
843	M842	0.2254	0.4263	0.4282	0.4422
844	M843	0.3382	0.2926	0.4246	0.433
845	M844	0.2254	0.4636	0.3661	0.3658
846	M845	0.1127	0.4028	0.3276	0.3324
847	M846	0.1879	0.3636	0.3111	0.3485
848	M847	0.263	0.4679	0.283	0.2548
849	M848	0.1879	0.2719	0.7211	0.3704
850	M849	0.1879	0.4619	0.4933	0.3566
851	M850	0.6012	0.4899	0.3414	0.322
852	M851	0.4884	0.5958	0.3817	0.4616
853	M852	0.4509	0.5063	0.2796	0.4967
854	M853	0.4884	0.4495	0.6755	0.3424
855	M854	0.4884	0.5012	0.5232	0.4475
856	M855	0.263	0.4804	0.4277	0.4647
857	M856	0.2254	0.5191	0.2789	0.4371
858	M857	0.263	0.5099	0.5037	0.3473
859	M858	0.0751	0.4945	0.5704	0.3341
860	M859	0.0751	0.4242	0.2297	0.4398
861	M860	0.2254	0.2098	0.6403	0.3342
862	M861	0.6012	0.1272	0.8055	0.4787
863	M862	0.3757	0.4139	0.4604	0.3425
864	M863	0.1879	0.5041	0.4715	0.3726
865	M864	0.7139	0.4512	0.229	0.4002
866	M865	0.4509	0.5425	0.4287	0.401
867	M866	0.4884	0.599	0.341	0.4778
868	M867	0.526	0.5392	0.1766	0.1296
869	M868	0.7514	0.2829	0.608	0.4656
870	M869	0.526	0.2241	0.648	0.4152
871	M870	0.7139	0.2723	0.8871	0.3375
872	M871	0.4133	0.4731	0.6629	0.4999
873	M872	0.7139	0.4551	0.416	0.306
874	M873	0.6763	0.4262	0.159	0.356
875	M874	0.2254	0.4412	0.4208	0.173
876	M875	0.1879	0.4277	0.3909	0.4401
877	M876	0.1879	0.4037	0.547	0.3964
878	M877	0.1503	0.2871	0.4372	0.4181
879	M878	0.3757	0.5014	0.5131	0.3893
880	M879	0.6012	0.4399	0.4184	0.4292
881	M880	0.6763	0.4533	0.4003	0.4576
882	M881	0.7514	0.4293	0.4278	0.4358
883	M882	0.4884	0.3157	0.3744	0.5148
884	M883	0.4133	0.4091	0.1574	0.4211
885	M884	0.526	0.4199	0.4661	0.3336
886	M885	0.7139	0.2853	0.5502	0.3117
887	M886	0.6012	0.4532	0.1572	0.3731
888	M887	0.6012	0.1873	0.5801	0.3747
889	M888	0.526	0.2763	0.6779	0.3501
890	M889	0.3382	0.4914	0.5393	0.4575
891	M890	0.7514	0.4572	0.552	0.4132
892	M891	0.6387	0.4703	0.5719	0.2788
893	M892	0.9769	0.3303	0.4298	0.3493
894	M893	0.6012	0.2406	0.5085	0.465
895	M894	0.3382	0.3288	0.3188	0.4073
896	M895	0.4509	0.403	0.5343	0.3251
897	M896	0.6012	0.4607	0.3097	0.4582
898	M897	0.526	0.3898	0.5087	0.3471
899	M898	0.4884	0.3627	0.2921	0.3991
900	M899	0.4509	0.4446	0.4126	0.4058
901	M900	0.789	0.4974	0.1295	0.3253
902	M901	0.6012	0.3395	0.4254	0.389
903	M902	0.6012	0.169	0.9408	0.7454
904	M903	0.6012	0.4931	0.2612	0.4567
905	M904	0.4509	0.4828	0.4966	0.4521
906	M905	0.7139	0.4094	0.4593	0.4659
907	M906	0.6763	0.2875	0.3685	0.5065
908	M907	0.6387	0.4839	0.9036	0.4204
909	M908	0.6012	0.4019	0.5282	0.3225
910	M909	0.3382	0.6032	0.3542	0.4658
911	M910	0.3006	0.4374	0.4857	0.4138
912	M911	0.1503	0.4089	0.7441	0.3687
913	M912	0.263	0.4213	0.7242	0.3616
914	M913	0.526	0.1146	0.7791	0.3209
915	M914	0.4509	0.2254	0.5405	0.4089
916	M915	0.2254	0.5968	0.3096	0.4762
917	M916	0.1127	0.5153	0.2829	0.3661
918	M917	0.5636	0.4394	0.5611	0.4478
919	M918	0.3757	0.5315	0.4033	0.4991
920	M919	0.4884	0.3829	0.5189	0.4177
921	M920	0.6763	0.4998	0.6818	0.4768
922	M921	0.6763	0.2308	0.4996	0.3625
923	M922	0.789	0.3572	0.3144	0.4115
924	M923	0.7514	0.4354	0.3462	0.4789
925	M924	0.3006	0.4261	0.7753	0.2762
926	M925	0.263	0.5762	0.465	0.4538
927	M926	0.2254	0.4373	0.3074	0.3584
928	M927	0.4509	0.4676	0.3976	0.378
929	M928	0.9393	0.4828	0.3913	0.2539
930	M929	0.6763	0.4741	0.5484	0.1104
931	M930	0.3006	0.4352	0.3625	0.371
932	M931	0.7139	0.1133	0.5423	0.454
933	M932	0.5636	0.5211	0.5262	0.438
934	M933	0.5636	0.4785	0.7214	0.43
935	M934	0.6012	0.4522	0.4136	0.4605
936	M935	0.4509	0.4555	0.6226	0.3133
937	M936	0.3757	0.5554	0.4055	0.2809
938	M937	0.2254	0.3813	0.209	0.4528
939	M938	0.526	0.3245	0.5388	0.4145
940	M939	0.1503	0.399	0.3227	0.4308
941	M940	0.1879	0.3629	0.447	0.3318
942	M941	0.6012	0.3409	0.4904	0.366
943	M942	0.9769	0.4829	0.4726	0.4482
944	M943	0.5636	0.4789	0.2532	0.3731
945	M944	0.526	0.5836	0.3296	0.4776
946	M945	0.2254	0.3213	0.4364	0.4423
947	M946	0.2254	0.4095	0.5947	0.4443
948	M947	0.4133	0.449	0.5442	0.4174
949	M948	0.8266	0.4888	0.302	0.4452
950	M949	0.6012	0.4033	0.5538	0.3998
951	M950	0.1503	0.4102	0.3784	0.3724
952	M951	0.5636	0.3636	0.5962	0.4046
953	M952	0.6012	0.2157	0.6645	0.3404
954	M953	0.3757	0.4522	0.2891	0.4298
955	M954	0.526	0.4816	0.6305	0.43
956	M955	0.4884	0.364	0.2958	0.5005
957	M956	0.6763	0.3725	0.6476	0.5299
958	M957	0.7139	0.4852	0.5747	0.4998
959	M958	0.5636	0.4752	0.5247	0.4959
960	M959	0.1127	0.4847	0.8085	0.3627
961	M960	0.4509	0.4615	0.5791	0.4821
962	M961	0.3757	0.4617	0.5413	0.3435
963	M962	0.2254	0.4291	0.2884	0.3026
964	M963	0.6387	0.4919	0.6941	0.4159
965	M964	0.3006	0.3819	0.7556	0.4751
966	M965	0.3757	0.5781	0.4823	0.3137
967	M966	0.8266	0.4333	0.704	0.3986
968	M967	0.2254	0.3175	0.8277	0.6518
969	M968	0.4509	0.5292	0.5424	0.4768
970	M969	0.4509	0.4249	0.399	0.4376
971	M970	0.6763	0.4794	0.2413	0.4234
972	M971	0.4133	0.535	0.5249	0.3844
973	M972	0.4509	0.4798	0.5781	0.408
974	M973	0.1127	0.4534	0.5672	0.4226
975	M974	0.526	0.4675	0.5166	0.4622
976	M975	0.4884	0.4467	0.5172	0.4364
977	M976	0.4133	0.4715	0.4608	0.4131
978	M977	0.7139	0.4986	0.6851	0.23
979	M978	0.3382	0.2783	0.538	0.3787
980	M979	0.4133	0.3684	0.4203	0.3566
981	M980	0.526	0.3103	0.5716	0.392
982	M981	0.5636	0.2864	0.856	0.3413
983	M982	0.5636	0.455	0.5466	0.434
984	M983	0.5636	0.4329	0.5444	0.4919
985	M984	0.5636	0.4784	0.1867	0.4612
986	M985	0.6012	0.4319	0.6492	0.455
987	M986	0.789	0.4836	0.2632	0.4745
988	M987	0.5636	0.5289	0.5157	0.3492
989	M988	0.6763	0.36	0.3393	0.4661
990	M989	0.0751	0.4372	0.3605	0.4779
991	M990	0.1879	0.4522	0.6344	0.4666
992	M991	0.1127	0.2678	0.4815	0.5098
993	M992	0.4133	0.5134	0.2684	0.3917
994	M993	0.3757	0.4203	0.3187	0.3411
995	M994	0.2254	0.4199	0.2576	0.4749
996	M995	0.3382	0.4893	0.491	0.3249
997	M996	0.2254	0.2663	0.5047	0.3119
998	M997	0.4133	0.4813	0.6082	0.4507
999	M998	0.1503	0.3835	0.2737	0.3142
1000	M999	0.4133	0.4996	0.6985	0.4392
1001	M1000	0.526	0.5565	0.3978	0.4748
1002	M1001	0.7514	0.4391	0.5355	0.485
1003	M1002	0.6012	0.4576	0.707	0.4126
1004	M1003	0.6387	0.4714	0.2405	0.4396
1005	M1004	0.4509	0.4676	0.365	0.3857
1006	M1005	0.1503	0.6063	0.1555	0.3178
1007	M1006	0.0751	0.4178	0.0354	0.3954
1008	M1007	0.1127	0.458	0.0355	0.3526
1009	M1008	0.1879	0.3928	0.616	0.3002
1010	M1009	0.3382	0.2442	0.5061	0.3906
1011	M1010	0.4884	0.2648	0.3979	0.4324
1012	M1011	0.6387	0.4259	0.4424	0.3303
1013	M1012	0.4884	0.4969	0.8063	0.416
1014	M1013	0.263	0.4904	0.7653	0.3103
1015	M1014	0.2254	0.4796	0.6176	0.4052
1016	M1015	0.7514	0.4612	0.6544	0.3617
1017	M1016	0.2254	0.4054	0.0312	0.4504
1018	M1017	0.5636	0.5159	0.3597	0.4107
1019	M1018	0.6763	0.3579	0.6673	0.5455
1020	M1019	0.4509	0.4427	0.3401	0.4191
1021	M1020	0.3757	0.443	0.692	0.4255
1022	M1021	0.3006	0.3262	0.6229	0.3354
1023	M1022	0.6387	0.425	0.3942	0.381
1024	M1023	0.263	0.5237	0.5477	0.4273
1025	M1024	0.526	0.5402	0.4493	0.3529
1026	M1025	0.4884	0.4926	0.5653	0.497
1027	M1026	0.4884	0.5041	0.4225	0.3049
1028	M1027	0.3757	0.6326	0.0755	0.1817
1029	M1028	0.1127	0.5272	0.4411	0.3443
1030	M1029	0.5636	0.5865	0.2174	0.2246
1031	M1030	0.1503	0.4947	0.336	0.2822
1032	M1031	0.1127	0.5374	0.331	0.1435
1033	M1032	0.0376	0.4708	0.7679	0.0751
1034	M1033	0.263	0.52	0.5301	0.2644
1035	M1034	0.3006	0.5503	0.2731	0.1831
1036	M1035	0.1503	0.4709	0.2552	0.092
1037	M1036	0.6012	0.4161	0.3263	0.1241
1038	M1037	0.4133	0.4806	0.0722	0.2637
1039	M1038	0.2254	0.6077	0.2268	0.3239
1040	M1039	0.4509	0.5136	0.3052	0.2967
1041	M1040	0.3006	0.6123	0.3141	0.3102
1042	M1041	0.1879	0.4779	0.7413	0.33
1043	M1042	0.1127	0.6016	0.2452	0.1858
1044	M1043	0.1127	0.5149	0.2509	0.2799
1045	M1044	0.0751	0.5332	0.4234	0.2268
1046	M1045	0.3382	0.6044	0.5599	0.4194
1047	M1046	0.263	0.557	0.3746	0.462
1048	M1047	0.4884	0.6377	0.2717	0.3936
1049	M1048	0.1503	0.5951	0.5118	0.3542
1050	M1049	0.1503	0.555	0.416	0.2855
1051	M1050	0.1503	0.5794	0.0677	0.2813
1052	M1051	0.2254	0.4841	0.321	0.3344
1053	M1052	0.1879	0.3697	0.5534	0.344
1054	M1053	0.1503	0.4479	0.5852	0.2611
1055	M1054	0.7514	0.4667	0.4979	0.2549
1056	M1055	0.3006	0.5453	0.4493	0.3118
1057	M1056	0.2254	0.4819	0.3182	0.3193
1058	M1057	0.263	0.6268	0.1975	0.3688
1059	M1058	0.0751	0.4954	0.7231	0.4275
1060	M1059	0.3757	0.5976	0.2026	0.1304
1061	M1060	0.526	0.5067	0.2491	0.3451
1062	M1061	0.4509	0.5317	0.1946	0.3911
1063	M1062	0.0751	0.5497	0.1973	0.3557
1064	M1063	0.1127	0.6013	0.2346	0.3292
1065	M1064	0.1879	0.5277	0.2859	0.4087
1066	M1065	0.3757	0.5958	0.5116	0.2864
1067	M1066	0.3006	0.4042	0.905	0.3449
1068	M1067	0.1127	0.5202	0.2864	0.3481
1069	M1068	0.1503	0.4307	0.263	0.2705
1070	M1069	0.2254	0.4635	0.4964	0.1936
1071	M1070	0.2254	0.3015	0.7597	0.4161
1072	M1071	0.4509	0.5444	0.3412	0.3792
1073	M1072	0.1127	0.5522	0.251	0.3802
1074	M1073	0.2254	0.5758	0.2516	0.355
1075	M1074	0.1879	0.5222	0.1893	0.4824
1076	M1075	0.5636	0.4909	0.3173	0.3303
1077	M1076	0.0751	0.5694	0.5402	0.4309
1078	M1077	0.1503	0.5555	0.19	0.4703
1079	M1078	0.1127	0.5771	0.4395	0.3345
1080	M1079	0.1879	0.5036	0.1599	0.3828
1081	M1080	0.0376	0.5481	0.2591	0.4067
1082	M1081	0.3006	0.5063	0.2378	0.3906
1083	M1082	0.1503	0.4003	0.1601	0.3067
1084	M1083	0.1127	0.5247	0.5814	0.3105
1085	M1084	0.3006	0.46	0.5195	0.3346
1086	M1085	0.526	0.4165	0.3036	0.3347
1087	M1086	0.5636	0.4077	0.1676	0.4224
1088	M1087	0.1879	0.228	0.5864	0.404
1089	M1088	0.1127	0.6414	0.2179	0.4318
1090	M1089	0.5636	0.5885	0.3668	0.3403
1091	M1090	0.6763	0.4992	0.2595	0.3381
1092	M1091	0.0751	0.4753	0.369	0.3597
1093	M1092	0.1127	0.4882	0.2226	0.3203
1094	M1093	0.1503	0.5844	0.2491	0.3044
1095	M1094	0.1127	0.4184	0.2196	0.3439
1096	M1095	0.0376	0.5463	0.316	0.257
1097	M1096	0.4509	0.4809	0.2965	0.1767
1098	M1097	0.1503	0.406	0.267	0.1925
1099	M1098	0.3006	0.5283	0.3687	0.2392
1100	M1099	0.3382	0.536	0.4706	0.2797
1101	M1100	0.3382	0.5533	0.3912	0.4314
1102	M1101	0.4133	0.5316	0.1882	0.2925
1103	M1102	0.526	0.6066	0.2509	0.3841
1104	M1103	0.3382	0.5571	0.3201	0.4334
1105	M1104	0.0376	0.6278	0.3323	0.3856
1106	M1105	0.0751	0.5542	0.2064	0.3718
1107	M1106	0.1503	0.4722	0.3575	0.3983
1108	M1107	0.2254	0.5041	0.0868	0.427
1109	M1108	0.1127	0.4073	0.5847	0.4318
1110	M1109	0.2254	0.438	0.1255	0.3713
1111	M1110	0.0376	0.3785	0.2225	0.4063
1112	M1111	0.1503	0.5297	0.5182	0.4067
1113	M1112	0.0376	0.441	0.2119	0.4618
1114	M1113	0.263	0.416	0.1151	0.4547
1115	M1114	0.3006	0.5251	0.2093	0.3214
1116	M1115	0.2254	0.5299	0.2831	0.3964
1117	M1116	0.1503	0.5137	0.5758	0.3354
1118	M1117	0.7139	0.451	0.1366	0.38
1119	M1118	0.526	0.5393	0.1794	0.4022
1120	M1119	0.4133	0.5804	0.5685	0.4774
1121	M1120	0.526	0.5245	0.097	0.451
1122	M1121	0.263	0.5392	0.4047	0.4197
1123	M1122	0.3006	0.4594	0.2062	0.3513
1124	M1123	0.3006	0.4865	0.0966	0.4495
1125	M1124	0.3757	0.5975	0.4451	0.1052
1126	M1125	0.3382	0.5201	0.3205	0.4077
1127	M1126	0.1127	0.3897	0.4946	0.31
1128	M1127	0.3382	0.511	0.3838	0.3111
1129	M1128	0.2254	0.3808	0.3289	0.7372
1130	M1129	0.5636	0.4335	0.2063	0.2625
1131	M1130	0.0751	0.5176	0.2428	0.1783
1132	M1131	0.2254	0.4381	0.2404	0.257
1133	M1132	0.4509	0.4071	0.3535	0.2322
1134	M1133	0.3757	0.4187	0.6555	0.0994
1135	M1134	0.4133	0.5032	0.5856	0.1287
1136	M1135	0.4509	0.5403	0.2136	0.3914
1137	M1136	0.4884	0.5013	0.2048	0.4218
1138	M1137	0.3757	0.5668	0.3655	0.3959
1139	M1138	0.263	0.5306	0.2766	0.3474
1140	M1139	0.526	0.5136	0.236	0.4359
1141	M1140	0.1879	0.4502	0.5709	0.4188
1142	M1141	0.4133	0.5131	0.2445	0.2313
1143	M1142	0.0376	0.58	0.2194	0.2256
1144	M1143	0.4884	0.4987	0.3372	0.3031
1145	M1144	0.1127	0.3477	0.2573	0.3878
1146	M1145	0.0376	0.4322	0.2991	0.304
1147	M1146	0.1127	0.5608	0.0401	0.2446
1148	M1147	0.1127	0.4569	0.3865	0.319
1149	M1148	0.1879	0.4713	0.589	0.3724
1150	M1149	0.1879	0.4746	0.1654	0.3652
1151	M1150	0.1879	0.4695	0.5976	0.3724
1152	M1151	0.3757	0.5417	0.3052	0.2345
1153	M1152	0.1879	0.5514	0.2781	0.3495
1154	M1153	0.0751	0.5352	0.1331	0.3382
1155	M1154	0.1503	0.3714	0.6843	0.4187
1156	M1155	0.3757	0.6213	0.4879	0.0398
1157	M1156	0.1503	0.604	0.2351	0.3224
1158	M1157	0.789	0.2852	0.3379	0.408
1159	M1158	0.3006	0.5912	0.5067	0.4075
1160	M1159	0.0751	0.4507	0.1572	0.2082
1161	M1160	0.1503	0.7084	0.3061	0.2807
1162	M1161	0.1503	0.4803	0.7754	0.3037
1163	M1162	0.2254	0.5287	0.2709	0.1521
1164	M1163	0.2254	0.5054	0.1468	0.1715
1165	M1164	0.3006	0.4812	0.3065	0.188
1166	M1165	0.3006	0.5086	0.34	0.2004
1167	M1166	0.2254	0.4241	0.2464	0.205
1168	M1167	0.7139	0.4977	0.5941	0.2382
1169	M1168	0.2254	0.4477	0.3708	0.1391
1170	M1169	0.4509	0.6293	0.374	0.3676
1171	M1170	0.3757	0.5093	0.1936	0.3813
1172	M1171	0.3382	0.56	0.5116	0.3769
1173	M1172	0.3382	0.5027	0.2332	0.3258
1174	M1173	0.0751	0.5256	0.4227	0.3465
1175	M1174	0.3006	0.6293	0.5236	0.3262
1176	M1175	0.7139	0.4462	0.507	0.405
1177	M1176	0.1503	0.4956	0.6411	0.4326
1178	M1177	0.3382	0.4711	0.6556	0.3958
1179	M1178	0.1503	0.4406	0.2563	0.2148
1180	M1179	0.1127	0.459	0.5621	0.3739
1181	M1180	0.5636	0.5966	0.0061	0.3382
1182	M1181	0.3382	0.5288	0.266	0.3754
1183	M1182	0.263	0.4878	0.5379	0.4099
1184	M1183	0.2254	0.4542	0.3893	0.1985
1185	M1184	0.4884	0.4564	0.5687	0.4107
1186	M1185	0.526	0.5839	0.5179	0.4903
1187	M1186	0.1879	0.4787	0.6846	0.4009
1188	M1187	0.4884	0.4992	0.4767	0.4422
1189	M1188	0.1127	0.4921	0.541	0.439
1190	M1189	0.4884	0.5624	0.5319	0.1782
1191	M1190	0.4133	0.4138	0.4192	0.41
1192	M1191	0.4133	0.428	0.6018	0.2013
1193	M1192	0.1503	0.54	0.5717	0.2673
1194	M1193	0.3757	0.4574	0.2935	0.2846
1195	M1194	0.1127	0.5193	0.2922	0.268
1196	M1195	0.2254	0.5179	0.2705	0.2462
1197	M1196	0.5636	0.4935	0.5347	0.1174
1198	M1197	0.2254	0.4609	0.2755	0.1962
1199	M1198	0.3382	0.5474	0.3032	0.1739
1200	M1199	0.5636	0.5387	0.2899	0.3584
1201	M1200	0.3757	0.5159	0.2018	0.3859
1202	M1201	0.3006	0.4385	0.2643	0.3038
1203	M1202	0.3382	0.4861	0.3741	0.3735
1204	M1203	0.4884	0.443	0.3368	0.3878
1205	M1204	0.4509	0.4828	0.5245	0.3246
1206	M1205	0.789	0.4931	0.6449	0.3704
1207	M1206	0.7139	0.4792	0.6686	0.3272
1208	M1207	0.0376	0.4621	0.3692	0.439
1209	M1208	0.1879	0.4291	0.462	0.323
1210	M1209	0.1879	0.2747	0.3062	0.7673
1211	M1210	0.1127	0.5234	0.2259	0.4197
1212	M1211	0.263	0.4922	0.307	0.4813
1213	M1212	0.1503	0.5463	0.2497	0.3786
1214	M1213	0.2254	0.4779	0.5979	0.3785
1215	M1214	0.2254	0.5455	0.2284	0.2646
1216	M1215	0.1503	0.548	0.3925	0.3862
1217	M1216	0.3757	0.5185	0.3929	0.4718
1218	M1217	0.2254	0.5867	0.3304	0.4301
1219	M1218	0.526	0.4925	0.3263	0.4063
1220	M1219	0.4509	0.6411	0.4858	0
1221	M1220	0.4884	0.5249	0.2407	0.3102
1222	M1221	0.5636	0.5672	0.5287	0.2841
1223	M1222	0.1127	0.4574	0.2984	0.3018
1224	M1223	0.1503	0.5713	0.3564	0.332
1225	M1224	0.1127	0.5019	0.2269	0.3291
1226	M1225	0.263	0.516	0.5062	0.2449
1227	M1226	0.3382	0.5914	0.5228	0.2684
1228	M1227	0.4509	0.5619	0.2774	0.1056
1229	M1228	0.2254	0.4889	0.3717	0.2017
1230	M1229	0.263	0.5759	0.3948	0.1718
1231	M1230	0.3382	0.6371	0.5517	0.3441
1232	M1231	0.3757	0.5767	0.3495	0.2664
1233	M1232	0.3006	0.4949	0.302	0.2788
1234	M1233	0.1127	0.5018	0.188	0.3312
1235	M1234	0.1503	0.5635	0.5326	0.3565
1236	M1235	0.5636	0.6094	0.5918	0.3214
1237	M1236	0.1879	0.4902	0.5705	0.4825
1238	M1237	0.4884	0.5208	0.3232	0.4594
1239	M1238	0.0751	0.5252	0.3008	0.3366
1240	M1239	0.1127	0.5062	0.2441	0.4398
1241	M1240	0.1127	0.4782	0.1551	0.3847
1242	M1241	0.1879	0.5061	0.3857	0.4225
1243	M1242	0.1879	0.4409	0.4558	0.3783
1244	M1243	0.3006	0.613	0.5022	0.2819
1245	M1244	0.1127	0.5618	0.5093	0.4705
1246	M1245	0.1879	0.4963	0.2901	0.2818
1247	M1246	0.4133	0.497	0.691	0.4375
1248	M1247	0.2254	0.6745	0.2328	0.4051
1249	M1248	0.526	0.6057	0.5406	0.0323
1250	M1249	0.2254	0.671	0.2733	0.2197
1251	M1250	0.3006	0.5086	0.3615	0.2953
1252	M1251	0.4509	0.5601	0.1965	0.2046
1253	M1252	0.3006	0.4555	0.3379	0.1311
1254	M1253	0.3757	0.5793	0.4612	0.0917
1255	M1254	0.0751	0.5769	0.4485	0.1096
1256	M1255	0.526	0.5222	0.3627	0.1531
1257	M1256	0.1503	0.5837	0.5536	0.1812
1258	M1257	0.1503	0.4133	0.6279	0.1339
1259	M1258	0.5636	0.5718	0.2713	0.3123
1260	M1259	0.1879	0.4329	0.3903	0.2761
1261	M1260	0.3006	0.5977	0.3831	0.1312
1262	M1261	0.1879	0.557	0.402	0.2687
1263	M1262	0.4884	0.5144	0.2834	0.36
1264	M1263	0.1127	0.5714	0.4222	0.2987
1265	M1264	0.3757	0.668	0.5921	0.4475
1266	M1265	0.4133	0.6172	0.5103	0.3808
1267	M1266	0.3006	0.5554	0.5539	0.3762
1268	M1267	0.1127	0.5539	0.5486	0.4207
1269	M1268	0.263	0.5847	0.3883	0.2554
1270	M1269	0.526	0.4354	0.3243	0.2816
1271	M1270	0.526	0.4106	0.6309	0.2935
1272	M1271	0.3757	0.5638	0.4935	0.4465
1273	M1272	0.3006	0.5547	0.5558	0.4128
1274	M1273	0.3757	0.6253	0.5642	0.4883
1275	M1274	0.3382	0.4427	0.6577	0.1741
1276	M1275	0.3757	0.4626	0.5365	0.227
1277	M1276	0.4884	0.4844	0.3144	0.3213
1278	M1277	0.526	0.4775	0.824	0.1158
1279	M1278	0.6763	0.4487	0.156	0.2591
1280	M1279	0.4133	0.4338	0.8072	0.3023
1281	M1280	0.7514	0.4958	0.517	0.3596
1282	M1281	0.3382	0.509	0.5059	0.258
1283	M1282	0.0376	0.6038	0.3568	0.2229
1284	M1283	0.3382	0.486	0.3685	0.333
1285	M1284	0.4133	0.4772	0.1811	0.3127
1286	M1285	0.4133	0.4934	0.6023	0.2617
1287	M1286	0.7514	0.422	0.5062	0.3241
1288	M1287	0.4509	0.4146	0.7171	0.2464
1289	M1288	0.4133	0.4478	0.5311	0.2421
1290	M1289	0.6763	0.31	0.7374	0.3005
1291	M1290	0.7514	0.3299	0.8501	0.7553
1292	M1291	0.526	0.4749	0.6182	0.2733
1293	M1292	0.3757	0.5523	0.5643	0.2397
1294	M1293	0.263	0.5075	0.522	0.4299
1295	M1294	0.5636	0.4923	0.4891	0.3679
1296	M1295	0.4509	0.4483	0.6802	0.387
1297	M1296	0.0376	0.3771	0.6514	0.3369
1298	M1297	0.6763	0.4946	0.3719	0.2756
1299	M1298	0.6763	0.4037	0.7371	0.42
1300	M1299	0.5636	0.504	0.4654	0.3357
1301	M1300	0.3757	0.5093	0.3543	0.1279
1302	M1301	0.4509	0.4179	0.6942	0.358
1303	M1302	0.4884	0.5267	0.3234	0.2644
1304	M1303	0.5636	0.4264	0.4869	0.3437
1305	M1304	0.4884	0.4158	0.6131	0.4026
1306	M1305	0.1879	0.3734	0.0908	0.302
1307	M1306	0.263	0.4407	0.7042	0.294
1308	M1307	0.6012	0.4786	0.4941	0.2939
1309	M1308	0.4509	0.449	0.7237	0.2533
1310	M1309	0.3382	0.4843	0.2828	0.2398
1311	M1310	0.7139	0.4266	0.4374	0.2387
1312	M1311	0.6012	0.4771	0.7564	0.3663
1313	M1312	0.6763	0.4565	0.3278	0.272
1314	M1313	0.2254	0.5442	0.5112	0.3939
1315	M1314	0.3757	0.5035	0.4943	0.3838
1316	M1315	0.9017	0.4892	0.5621	0.2025
1317	M1316	0.4133	0.2075	0.6154	0.4282
1318	M1317	0.3006	0.422	0.1885	0.3291
1319	M1318	0.3382	0.5415	0.5699	0.3298
1320	M1319	0.5636	0.4972	0.3188	0.2561
1321	M1320	0.263	0.3834	0.8268	0.3168
1322	M1321	0.4509	0.424	0.3952	0.2384
1323	M1322	0.4133	0.4613	0.7089	0.44
1324	M1323	0.4884	0.4843	0.691	0.3811
1325	M1324	0.1879	0.4677	0.7877	0.3051
1326	M1325	0.4133	0.2364	0.4746	0.3961
1327	M1326	0.3757	0.5202	0.1284	0.2429
1328	M1327	0.3382	0.5147	0.1038	0.4256
1329	M1328	0.3006	0.2575	0.6812	0.3972
1330	M1329	0.7514	0.4235	0.7414	0.2821
1331	M1330	0.2254	0.5007	0.3223	0.2213
1332	M1331	0.263	0.4676	0.4573	0.2911
1333	M1332	0.263	0.5748	0.2001	0.2419
1334	M1333	0.3382	0.5007	0.5994	0.4143
1335	M1334	0.4133	0.4579	0.3953	0.3845
1336	M1335	0.3006	0.2781	0.4033	0.389
1337	M1336	0.1503	0.4174	0.6396	0.3561
1338	M1337	0.6012	0.4739	0.7112	0.3418
1339	M1338	0.9393	0.4017	0.6235	0.2993
1340	M1339	0.4133	0.49	0.6057	0.2303
1341	M1340	0.4509	0.5663	0.2843	0.2111
1342	M1341	0.1879	0.4851	0.6383	0.3811
1343	M1342	0.5636	0.4309	0.778	0.37
1344	M1343	0.789	0.3329	0.4621	0.4152
1345	M1344	0.1503	0.4731	0.625	0.4049
1346	M1345	0.4509	0.184	0.6035	0.327
1347	M1346	0.3757	0.4484	0.689	0.2351
1348	M1347	0.3382	0.5381	0.5377	0.289
1349	M1348	0.6012	0.4787	0.7323	0.381
1350	M1349	0.8642	0.3337	0.7137	0.4271
1351	M1350	0.1503	0.5027	0.5182	0.2183
1352	M1351	0.5636	0.4776	0.6269	0.2282
1353	M1352	0.4884	0.4143	0.4628	0.2066
1354	M1353	0.4884	0.4968	0.5337	0.2112
1355	M1354	0.5636	0.4759	0.4636	0.3506
1356	M1355	0.9769	0.4841	0.4586	0.3541
1357	M1356	0.263	0.4218	0.5963	0.461
1358	M1357	0.7139	0.4355	0.7679	0.3808
1359	M1358	0.526	0.4898	0.5147	0.3536
1360	M1359	0.1503	0.4724	0.6476	0.3729
1361	M1360	0.4133	0.4752	0.7622	0.3223
1362	M1361	0.4884	0.5381	0.4996	0.2614
1363	M1362	0.3757	0.4745	0.538	0.2347
1364	M1363	0.4133	0.5023	0.3569	0.1885
1365	M1364	0.6763	0.485	0.2931	0.1983
1366	M1365	0.9017	0.1406	0.7748	0.3018
1367	M1366	0.4509	0.3194	0.4578	0.387
1368	M1367	0.3382	0.4185	0.5851	0.392
1369	M1368	0.3382	0.4988	0.8649	0.3411
1370	M1369	0.526	0.4347	0.6892	0.4729
1371	M1370	0.6012	0.4158	0.7861	0.3982
1372	M1371	0.4509	0.4345	0.4518	0.3029
1373	M1372	0.6387	0.446	0.5926	0.2136
1374	M1373	0.5636	0.5229	0.3889	0.2848
1375	M1374	0.263	0.474	0.7219	0.2298
1376	M1375	0.526	0.4374	0.5646	0.2455
1377	M1376	0.263	0.4122	0.4594	0.3387
1378	M1377	0.7514	0.4939	0.5092	0.397
1379	M1378	0.4133	0.5248	0.589	0.4987
1380	M1379	0.7139	0.4142	0.5074	0.4112
1381	M1380	0.263	0.4536	0.6696	0.405
1382	M1381	0.3382	0.4502	0.5913	0.3863
1383	M1382	0.7514	0.4784	0.6876	0.2292
1384	M1383	0.526	0.4901	0.7724	0.3665
1385	M1384	0.3382	0.5204	0.2179	0.2793
1386	M1385	0.0751	0.5383	0.5806	0.2868
1387	M1386	0.4133	0.4978	0.0156	0.2774
1388	M1387	0.5636	0.5118	0.519	0.2054
1389	M1388	0.2254	0.538	0.3059	0.2714
1390	M1389	0.4509	0.5702	0.3098	0.1906
1391	M1390	0.3006	0.5042	0.3045	0.3216
1392	M1391	0.4509	0.4961	0.1674	0.2663
1393	M1392	0.4133	0.5176	0.5901	0.3688
1394	M1393	0.6012	0.4813	0.2159	0.3658
1395	M1394	0.1503	0.5377	0.2311	0.3666
1396	M1395	0.1879	0.5532	0.2947	0.269
1397	M1396	0.4884	0.4528	0.0912	0.2337
1398	M1397	0.5636	0.5227	0.5807	0.3657
1399	M1398	0.526	0.4836	0.6189	0.3482
1400	M1399	0.789	0.4431	0.479	0.2299
1401	M1400	0.3006	0.5224	0.5605	0.2545
1402	M1401	0.3006	0.47	0.4416	0.2122
1403	M1402	0.3757	0.4695	0.6766	0.2908
1404	M1403	0.2254	0.233	0.4632	0.306
1405	M1404	0.6012	0.4591	0.2263	0.3422
1406	M1405	0.4509	0.5403	0.3963	0.3331
1407	M1406	0.4509	0.5146	0.581	0.4234
1408	M1407	0.6387	0.4672	0.7155	0.3409
1409	M1408	0.3757	0.5425	0.1487	0.2722
1410	M1409	0.3382	0.5289	0.4921	0.2971
1411	M1410	0.3757	0.5863	0.2362	0.3295
1412	M1411	0.3757	0.531	0.1584	0.3089
1413	M1412	0.526	0.5103	0.2236	0.175
1414	M1413	0.4509	0.5745	0.2961	0.1901
1415	M1414	0.526	0.6008	0.1991	0.2273
1416	M1415	0.4509	0.5302	0.2031	0.1925
1417	M1416	0.4884	0.4143	0.2661	0.3517
1418	M1417	0.3757	0.5629	0.1801	0.3522
1419	M1418	0.3006	0.5583	0.1833	0.3492
1420	M1419	0.4133	0.5492	0.5029	0.3294
1421	M1420	0.3757	0.5687	0.2103	0.2491
1422	M1421	0.3382	0.4728	0.2958	0.2874
1423	M1422	0.526	0.6396	0.4831	0.3467
1424	M1423	0.0751	0.5033	0.5628	0.3067
1425	M1424	0.4133	0.4671	0.4699	0.389
1426	M1425	0.6763	0.3892	0.7959	0.3365
1427	M1426	0.3006	0.5533	0.5073	0.3185
1428	M1427	0.1503	0.5003	0.557	0.3406
1429	M1428	0.3006	0.579	0.2312	0.334
1430	M1429	0.4509	0.5264	0.3442	0.2161
1431	M1430	0.263	0.4451	0.5055	0.2741
1432	M1431	0.4509	0.3793	0.7457	0.7142
1433	M1432	0.6763	0.4896	0.3305	0.2477
1434	M1433	0.3757	0.481	0.1666	0.4066
1435	M1434	0.1127	0.5316	0.5418	0.3133
1436	M1435	0.3382	0.6431	0.3041	0.282
1437	M1436	0.3757	0.5179	0.5769	0.4928
1438	M1437	0.263	0.4976	0.5822	0.4696
1439	M1438	0.4884	0.5372	0.1307	0.4197
1440	M1439	0.4509	0.4874	0.3825	0.3858
1441	M1440	0.3382	0.4173	0.5897	0.343
1442	M1441	0.4509	0.0852	0.5242	0.3859
1443	M1442	0.4509	0.1471	0.6658	0.3928
1444	M1443	0.4884	0.1493	0.5367	0.5126
1445	M1444	0.9769	0.3699	0.405	0.3661
1446	M1445	0.3006	0.5976	0.5945	0.4272
1447	M1446	0.4884	0.4481	0.5393	0.4778
1448	M1447	0.2254	0.3772	0.3579	0.4699
1449	M1448	0.4133	0.332	0.3196	0.4244
1450	M1449	0.3382	0.5444	0.5594	0.4692
1451	M1450	0.3382	0.4777	0.1601	0.3279
1452	M1451	0.3757	0.5328	0.4063	0.4173
1453	M1452	0.263	0.4907	0.5882	0.4302
1454	M1453	0.4133	0.079	0.3246	0.3916
1455	M1454	0.5636	0.068	0.5224	0.4623
1456	M1455	0.7514	0.4604	0.3	0.3379
1457	M1456	0.5636	0.5743	0.2249	0.4527
1458	M1457	0.5636	0.4921	0.0971	0.4928
1459	M1458	0.3757	0.3774	0.6241	0.7602
1460	M1459	0.4884	0.3678	0.6388	0.8327
1461	M1460	0.3757	0.6299	0.45	0.3723
1462	M1461	0.4133	0.1234	0.6431	0.3498
1463	M1462	0.7139	0.2412	0.6693	0.3761
1464	M1463	0.8642	0.4611	0.5853	0.4127
1465	M1464	0.3382	0.5134	0.5819	0.4043
1466	M1465	0.2254	0.3403	0.2657	0.5554
1467	M1466	0.3006	0.3686	0.7425	0.8795
1468	M1467	0.3382	0.5756	0.378	0.4161
1469	M1468	0.526	0.5376	0.3634	0.497
1470	M1469	0.3757	0.5066	0.5631	0.4131
1471	M1470	0.3757	0.6078	0.3711	0.4396
1472	M1471	0.7139	0.3399	0.269	0.4677
1473	M1472	0.263	0.3724	0.185	0.5945
1474	M1473	0.3757	0.5273	0.3392	0.327
1475	M1474	0.4509	0.4744	0.3487	0.4751
1476	M1475	0.3757	0.3053	0.2485	0.5626
1477	M1476	0.526	0.446	0.3857	0.4677
1478	M1477	0.1503	0.3418	0.5003	0.7741
1479	M1478	0.0376	0.4288	0.4564	0.4417
1480	M1479	0.4133	0.5222	0.5261	0.3988
1481	M1480	0.4884	0.3939	0.7237	0.6565
1482	M1481	0.4884	0.4409	0.2611	0.4207
1483	M1482	0.6763	0.2381	0.6006	0.3773
1484	M1483	0.7139	0.3123	0.2534	0.3527
1485	M1484	0.7139	0.4486	0.3362	0.4025
1486	M1485	0.526	0.4548	0.4859	0.4826
1487	M1486	0.7139	0.3624	0.4956	0.5619
1488	M1487	0.4509	0.3307	0.1781	0.4679
1489	M1488	0.7514	0.4833	0.3896	0.474
1490	M1489	0.4509	0.4966	0.4895	0.4374
1491	M1490	0.4884	0.2251	0.4161	0.8868
1492	M1491	0.3382	0.2712	0.4636	0.4651
1493	M1492	0.6387	0.1609	0.487	0.7899
1494	M1493	0.3382	0.4249	0.2757	0.4096
1495	M1494	0.4884	0.399	0.6871	0.6769
1496	M1495	0.3757	0.3427	0.2274	0.387
1497	M1496	0.3006	0.3807	0.3794	0.538
1498	M1497	0.4133	0.6044	0.2297	0.4463
1499	M1498	0.3382	0.2884	0.7284	0.5118
1500	M1499	0.3382	0.3507	0.485	0.4524
1501	M1500	0.5636	0.5584	0.0769	0.4063
1502	M1501	0.4884	0.2805	0.4657	0.806
1503	M1502	0.6012	0.4575	0.1436	0.4443
1504	M1503	0.263	0.5165	0.179	0.4276
1505	M1504	0.3382	0.6845	0.3021	0.3855
1506	M1505	0.4133	0.4312	0.3192	0.3995
1507	M1506	0.526	0.5231	0.2913	0.4567
1508	M1507	0.3757	0.3591	0.3298	0.4518
1509	M1508	0.9017	0.3866	0.1965	0.4037
1510	M1509	0.0751	0.4783	0.0719	0.4408
1511	M1510	0.6012	0.4959	0.6316	0.3919
1512	M1511	0.4509	0.3984	0.7612	0.444
1513	M1512	0.4509	0.4798	0.6591	0.3624
1514	M1513	0.3006	0.5242	0.5551	0.4134
1515	M1514	0.263	0.3839	0.3189	0.417
1516	M1515	0.4884	0.6629	0.213	0.2948
1517	M1516	0.526	0.2842	0.4306	0.3619
1518	M1517	0.3006	0.5196	0.581	0.4945
1519	M1518	0.6763	0.203	0.7154	0.7796
1520	M1519	0.0376	0.4463	0.5002	0.4646
1521	M1520	0.7514	0.4967	0.565	0.4509
1522	M1521	0.9017	0.2641	0.6976	0.78
1523	M1522	0.8266	0.1217	0.6271	0.4068
1524	M1523	0.526	0.3201	0.3775	0.6058
1525	M1524	0.526	0.3543	0.372	0.47
1526	M1525	0.4884	0.5005	0.4457	0.4669
1527	M1526	0.3757	0.5309	0.5683	0.4395
1528	M1527	0.4884	0.4678	0.3561	0.4208
1529	M1528	0.526	0.3635	0.6697	0.6923
1530	M1529	0.7514	0.1381	0.4669	0.3646
1531	M1530	0.6012	0.3117	0.5923	0.764
1532	M1531	0.3757	0.2189	0.4161	0.4823
1533	M1532	0.3382	0.3792	0.6958	0.6446
1534	M1533	0.4884	0.5075	0.4798	0.467
1535	M1534	0.4884	0.4683	0.7004	0.4724
1536	M1535	0.7139	0.1744	0.3793	0.4388
1537	M1536	0.3006	0.3391	0.6628	0.696
1538	M1537	0.4133	0.5533	0.4504	0.4822
1539	M1538	0.5636	0.5345	0.3991	0.4992
1540	M1539	0.526	0.5902	0.3874	0.4787
1541	M1540	0.526	0.4696	0.2933	0.4024
1542	M1541	0.4509	0.4691	0.4551	0.4492
1543	M1542	0.526	0.5172	0.3258	0.4718
1544	M1543	0.263	0.3937	0.6645	0.6143
1545	M1544	0.4509	0.6258	0.494	0.3924
1546	M1545	0.1879	0.4515	0.5849	0.374
1547	M1546	0.4509	0.2488	0.6686	0.3584
1548	M1547	0.0751	0.4704	0.0563	0.3767
1549	M1548	0.4133	0.3538	0.404	0.3218
1550	M1549	0.6387	0.0346	0.6894	0.6712
1551	M1550	0.5636	0.6105	0.5731	0.4778
1552	M1551	0.4884	0.2413	0.3365	0.5481
1553	M1552	0.526	0.4423	0.2263	0.4757
1554	M1553	0.3757	0.5255	0.3791	0.493
1555	M1554	0.5636	0.377	0.4594	0.47
1556	M1555	0.2254	0.5739	0.2935	0.4098
1557	M1556	0.5636	0.357	0.4552	0.4423
1558	M1557	0.6763	0.3463	0.502	0.3954
1559	M1558	0.526	0.5598	0.4222	0.4663
1560	M1559	0.4509	0.5618	0.3759	0.2837
1561	M1560	0.5636	0.5788	0.5713	0.4934
1562	M1561	0.789	0.367	0.6319	0.4347
1563	M1562	0.6012	0.3835	0.3608	0.4576
1564	M1563	0.6763	0.3561	0.2144	0.3192
1565	M1564	0.3006	0.4945	0.4251	0.4649
1566	M1565	0.3382	0.5211	0.2218	0.4751
1567	M1566	0.4133	0.505	0.3671	0.4662
1568	M1567	0.3757	0.5242	0.3009	0.439
1569	M1568	0.3382	0.4448	0.2545	0.4155
1570	M1569	0.4509	0.553	0.4228	0.331
1571	M1570	0.2254	0.4864	0.5125	0.4284
1572	M1571	0.4133	0.4548	0.2705	0.4909
1573	M1572	0.526	0.3721	0.4254	0.5012
1574	M1573	0.9017	0.204	0.6958	0.3751
1575	M1574	0.3382	0.6317	0.3255	0.4601
1576	M1575	0.3006	0.5212	0.4225	0.4676
1577	M1576	0.3006	0.667	0.1824	0.4882
1578	M1577	0.1503	0.6	0.3243	0.1145
1579	M1578	0.2254	0.4177	0.3009	0.4387
1580	M1579	0.263	0.4611	0.2135	0.3105
1581	M1580	0.0751	0.7279	0.2861	0.306
1582	M1581	0.263	0.4771	0.2356	0.1896
1583	M1582	0.0376	0.4622	0.3407	0.3413
1584	M1583	0.0751	0.4205	0.1882	0.3505
1585	M1584	0.3757	0.5426	0.3544	0.2664
1586	M1585	0.1879	0.5116	0.395	0.1569
1587	M1586	0.526	0.4422	0.4108	0.2121
1588	M1587	0.4133	0.399	0.5657	0.3101
1589	M1588	0.6387	0.1861	0.3204	0.4817
1590	M1589	0.1879	0.3013	0.146	0.3365
1591	M1590	0.1503	0.435	0.0898	0.4297
1592	M1591	0.0751	0.3862	0.2958	0.4144
1593	M1592	0.1503	0.4253	0.1633	0.2389
1594	M1593	0.4133	0.6404	0.3807	0.2628
1595	M1594	0.263	0.4953	0.3485	0.3726
1596	M1595	0.263	0.423	0.7636	0.3483
1597	M1596	0.4133	0.4397	0.3153	0.3084
1598	M1597	0.0751	0.2392	0.5765	0.3464
1599	M1598	0.263	0.2342	0.5075	0.3202
1600	M1599	0.2254	0.4354	0.2444	0.149
1601	M1600	0.3006	0.6086	0.1783	0.1182
1602	M1601	0.3006	0.4322	0.4091	0.2466
1603	M1602	0.9769	0.3551	0.4785	0.4383
1604	M1603	0.1879	0.5127	0.3766	0.3459
1605	M1604	0.2254	0.3803	0.3599	0.4124
1606	M1605	0.526	0.5288	0.586	0.3645
1607	M1606	0.3006	0.5287	0.4217	0.3855
1608	M1607	0.1503	0.4604	0.1182	0.326
1609	M1608	0.1879	0.5793	0.3426	0.3533
1610	M1609	0.263	0.4386	0.151	0.4246
1611	M1610	0.3006	0.457	0.2083	0.3837
1612	M1611	0.1879	0.3913	0.1337	0.3501
1613	M1612	0.3006	0.3324	0.2103	0.3314
1614	M1613	0.1879	0.4085	0.182	0.2929
1615	M1614	0.1503	0.3144	0.249	0.4934
1616	M1615	0.1879	0.4992	0.3622	0.3838
1617	M1616	0.4133	0.1694	0.596	0.4118
1618	M1617	0.4884	0.0938	0.3483	0.4921
1619	M1618	0.0751	0.3613	0.0653	0.4028
1620	M1619	0.1879	0.3293	0.4286	0.358
1621	M1620	0.1503	0.488	0.783	0.4328
1622	M1621	0.1127	0.4135	0.7687	0.1566
1623	M1622	0.1127	0.6505	0.4698	0.4078
1624	M1623	0.263	0.2725	0.4338	0.4913
1625	M1624	0.6012	0.4004	0.6633	0.4754
1626	M1625	0.0376	0.4092	0.5986	0.3638
1627	M1626	0.263	0.4906	0.8437	0.4222
1628	M1627	0.2254	0.2704	0.5532	0.3889
1629	M1628	0.1879	0.3615	0.6803	0.7511
1630	M1629	0.1503	0.4101	0.1566	0.3715
1631	M1630	0.1879	0.3784	0.7955	0.6975
1632	M1631	0.3382	0.3439	0.2169	0.3286
1633	M1632	0.4509	0.0682	0.6602	0.3672
1634	M1633	0.1127	0.4982	0.3824	0.4367
1635	M1634	0.7514	0.1568	0.518	0.4836
1636	M1635	0.6763	0.1636	0.5285	0.3696
1637	M1636	0.1879	0.3673	0.2353	0.465
1638	M1637	0.1879	0.5603	0.2261	0.2863
1639	M1638	0.1127	0.3396	0.2306	0.5187
1640	M1639	0.3757	0.3778	0.2075	0.4759
1641	M1640	0.3006	0.4547	0.432	0.4428
1642	M1641	0.1879	0.4633	0.3925	0.4138
1643	M1642	0.263	0.401	0.2833	0.3516
1644	M1643	0.3382	0.4299	0.2187	0.3729
1645	M1644	0.3382	0.3966	0.6261	0.3479
1646	M1645	0.3757	0.2836	0.6073	0.7452
1647	M1646	0.2254	0.5837	0.4205	0.1641
1648	M1647	0.4509	0.3316	0.3927	0.3107
1649	M1648	0.3382	0.3412	0.3737	0.4855
1650	M1649	0.0751	0.3743	0.3603	0.499
1651	M1650	0.3757	0.3147	0.2345	0.4818
1652	M1651	0.2254	0.3932	0.2009	0.4558
1653	M1652	0.3006	0.5902	0.3794	0.4802
1654	M1653	0.1127	0.2572	0.3648	0.4822
1655	M1654	0.1879	0.5096	0.199	0.2275
1656	M1655	0.7139	0.3245	0.3008	0.4983
1657	M1656	0.3757	0.4133	0.2816	0.4674
1658	M1657	0.1503	0.2188	0.3333	0.3961
1659	M1658	0.263	0.41	0.1712	0.4109
1660	M1659	0.3382	0.4864	0.3339	0.3744
1661	M1660	0.4884	0.4075	0.6814	0.3885
1662	M1661	0.6387	0.1589	0.3353	0.3167
1663	M1662	0.3006	0.4232	0.696	0.3869
1664	M1663	0.2254	0.3563	0.1712	0.3627
1665	M1664	0.0751	0.3738	0.3214	0.4314
1666	M1665	0.1879	0.5336	0.2783	0.459
1667	M1666	0.4133	0.3088	0.1929	0.4966
1668	M1667	0.1879	0.3554	0.5536	0.488
1669	M1668	0.4133	0.4607	0.0699	0.4646
1670	M1669	0.5636	0.3585	0.7416	0.3551
1671	M1670	0.3006	0.3991	0.2992	0.4718
1672	M1671	0.1879	0.4135	0.6606	0.3834
1673	M1672	0.3757	0.3817	0.2424	0.3667
1674	M1673	0.4133	0.435	0.1803	0.2632
1675	M1674	0.2254	0.3201	0.5725	0.3661
1676	M1675	0.4509	0.446	0.126	0.3133
1677	M1676	0.1127	0.5088	0.3856	0.1644
1678	M1677	0.2254	0.4332	0.3379	0.3615
1679	M1678	0.2254	0.3908	0.2526	0.3046
1680	M1679	0.7514	0.4357	0.2928	0.4409
1681	M1680	0.526	0.4394	0.3396	0.4677
1682	M1681	0.3006	0.4739	0.2344	0.4802
1683	M1682	0.1879	0.324	0.5914	0.3846
1684	M1683	0.6763	0.4091	0.1519	0.4708
1685	M1684	0.3757	0.3567	0.7297	0.4301
1686	M1685	0.2254	0.2132	0.5338	0.7229
1687	M1686	0.1503	0.4137	0.2952	0.488
1688	M1687	0.3006	0.4488	0.2252	0.312
1689	M1688	0.1503	0.4564	0.2708	0.3101
1690	M1689	0.3006	0.2711	0.714	0.7469
1691	M1690	0.4509	0.0416	0.548	0.4783
1692	M1691	0.3006	0.535	0.2182	0.2651
1693	M1692	0.2254	0.3003	0.2378	0.4348
1694	M1693	0.1503	0.5434	0.2514	0.4889
1695	M1694	0.1503	0.4565	0.1818	0.3171
1696	M1695	0.1503	0.5868	0.2949	0.3991
1697	M1696	0.1879	0.4779	0.4696	0.4048
1698	M1697	0.3006	0.2918	0.3497	0.5241
1699	M1698	0.0751	0.3807	0.2131	0.3752
1700	M1699	0.1879	0.3514	0.1672	0.3886
1701	M1700	0.3757	0.2307	0.3383	0.3505
1702	M1701	0.1879	0.41	0.1479	0.2995
1703	M1702	0.2254	0.4759	0.5652	0.1691
1704	M1703	0.3382	0.3457	0.5784	0.3863
1705	M1704	0.7139	0.3187	0.4465	0.3501
1706	M1705	0.2254	0.4247	0.368	0.4852
1707	M1706	0.263	0.4732	0.2006	0.4444
1708	M1707	0.1879	0.449	0.3778	0.449
1709	M1708	0.1879	0.5484	0.3307	0.211
1710	M1709	0.4884	0.4427	0.6511	0.4379
1711	M1710	0.6012	0.444	0.6728	0.3882
1712	M1711	0.1879	0.5107	0.5505	0.4804
1713	M1712	0.263	0.4108	0.2882	0.2726
1714	M1713	0.0751	0.3228	0.4393	0.333
1715	M1714	0.3006	0.3991	0.3803	0.3816
1716	M1715	0.526	0.3069	0.217	0.3474
1717	M1716	0.526	0.4101	0.6374	0.1689
1718	M1717	0.526	0.4193	0.3827	0.3404
1719	M1718	0.5636	0.4654	0.4644	0.3845
1720	M1719	0.3006	0.5893	0.3295	0.45
1721	M1720	0.1879	0.4204	0.2693	0.4786
1722	M1721	0.263	0.3569	0.3801	0.4902
1723	M1722	0.4884	0.4516	0.2913	0.2646
1724	M1723	0.6763	0.4626	0.2611	0.4073
1725	M1724	0.3757	0.4054	0.2773	0.4726
1726	M1725	0.3382	0.324	0.1593	0.3508
1727	M1726	0.4509	0.4643	0.1685	0.3166
1728	M1727	0.6012	0.3755	0.3077	0.4388
1729	M1728	0.3006	0.3958	0.2051	0.3441
1730	M1729	0.263	0.5319	0.4256	0.1902
1731	M1730	0.4884	0.3118	0.2575	0.3294
1732	M1731	0.1879	0.3921	0.2318	0.5103
1733	M1732	0.4509	0.0677	0.4228	0.4483
1734	M1733	0.1879	0.4315	0.6279	0.4542
1735	M1734	0.3006	0.4486	0.315	0.4926
1736	M1735	0.1879	0.5647	0.4348	0.2265
1737	M1736	0.1127	0.3198	0.112	0.3943
1738	M1737	0.1879	0.4104	0.1334	0.4663
1739	M1738	0.0376	0.3064	0.2762	0.4224
1740	M1739	0.3757	0.3796	0.3934	0.4108
1741	M1740	0.263	0.4301	0.1743	0.4744
1742	M1741	0.4133	0.4169	0.6493	0.3704
1743	M1742	0.526	0.4429	0.1295	0.3063
1744	M1743	0.263	0.4989	0.5563	0.2839
1745	M1744	0.4509	0.3253	0.4313	0.3061
1746	M1745	0.4884	0.3923	0.7001	0.3066
1747	M1746	0.3757	0.2851	0.43	0.4455
1748	M1747	0.3757	0.3755	0.7341	0.4404
1749	M1748	0.6012	0.473	0.5075	0.4059
1750	M1749	0.7139	0.3459	0.2226	0.4422
1751	M1750	0.1879	0.4457	0.2615	0.4483
1752	M1751	0.0751	0.3573	0.7282	0.3079
1753	M1752	0.3006	0.5025	0.2708	0.4234
1754	M1753	0.789	0.4065	0.3789	0.4215
1755	M1754	0.0751	0.4505	0.2091	0.486
1756	M1755	0.263	0.5062	0.4013	0.4307
1757	M1756	0.3757	0.3937	0.6662	0.6746
1758	M1757	0.4509	0.3571	0.3142	0.4328
1759	M1758	0.1127	0.4354	0.1586	0.3966
1760	M1759	0.6387	0.218	0.4188	0.4221
1761	M1760	0.3757	0.3939	0.1828	0.3069
1762	M1761	0.1879	0.4518	0.3893	0.0987
1763	M1762	0.4884	0.4502	0.3777	0.2529
1764	M1763	0.526	0.3591	0.2221	0.3575
1765	M1764	0.4133	0.1776	0.5322	0.3597
1766	M1765	0.263	0.4502	0.1435	0.4623
1767	M1766	0.0751	0.4847	0.1998	0.4426
1768	M1767	0.1879	0.5177	0.2357	0.4368
1769	M1768	0.3757	0.3562	0.391	0.4144
1770	M1769	0.1503	0.5306	0.2404	0.1883
1771	M1770	0.2254	0.439	0.722	0.3358
1772	M1771	0.2254	0.3431	0.7236	0.8479
1773	M1772	0.1503	0.5026	0.2134	0.3695
1774	M1773	0.3382	0.404	0.4511	0.3793
1775	M1774	0.6012	0.3141	0.229	0.3661
1776	M1775	0.0751	0.3805	0.094	0.4237
1777	M1776	0.4509	0.4119	0.2933	0.4342
1778	M1777	0.526	0.3775	0.5845	0.3144
1779	M1778	0.1503	0.4753	0.0402	0.2775
1780	M1779	0.1879	0.5227	0.5364	0.4086
1781	M1780	0.3757	0.3722	0.5928	0.8298
1782	M1781	0.5636	0.4705	0.2315	0.4639
1783	M1782	0.263	0.4322	0.1876	0.4333
1784	M1783	0.526	0.5049	0.2659	0.4925
1785	M1784	0.1127	0.6222	0.5136	0.2641
1786	M1785	0.1503	0.525	0.2912	0.3831
1787	M1786	0.4509	0.3927	0.852	0.3466
1788	M1787	0.1503	0.4121	0.2512	0.4082
1789	M1788	0.3006	0.315	0.3805	0.3932
1790	M1789	0.1879	0.3181	0.1457	0.3994
1791	M1790	0.526	0.4041	0.34	0.4165
1792	M1791	0.263	0.3837	0.4608	0.3444
1793	M1792	0.4509	0.2175	0.3956	0.3427
1794	M1793	0.3757	0.3246	0.5296	0.389
1795	M1794	0.2254	0.4391	0.1499	0.4003
1796	M1795	0.3382	0.5099	0.2555	0.4693
1797	M1796	0.3006	0.5236	0.3601	0.3193
1798	M1797	0.4133	0.515	0.406	0.4165
1799	M1798	0.4133	0.4597	0.2059	0.3122
1800	M1799	0.6387	0.4279	0.6389	0.3778
1801	M1800	0.1879	0.5124	0.5608	0.4101
1802	M1801	0.3382	0.389	0.2525	0.4169
1803	M1802	0.1879	0.5177	0.2218	0.4015
1804	M1803	0.1879	0.3724	0.2961	0.7774
1805	M1804	0.5636	0.3943	0.2614	0.3752
1806	M1805	0.1503	0.5088	0.3544	0.2507
1807	M1806	0.1503	0.4873	0.2866	0.3443
1808	M1807	0.2254	0.576	0.3041	0.4004
1809	M1808	0.3757	0.5237	0.2471	0.3729
1810	M1809	0.6012	0.4992	0.3057	0.1553
1811	M1810	0.4509	0.4431	0.3253	0.3597
1812	M1811	0.4509	0.6485	0.141	0.3274
1813	M1812	0.4509	0.4071	0.1479	0.3289
1814	M1813	0.263	0.565	0.128	0.1837
1815	M1814	0.9017	0.4657	0.3407	0.2831
1816	M1815	0.5636	0.4697	0.1377	0.3265
1817	M1816	0.526	0.5611	0.2072	0.2884
1818	M1817	0.4133	0.446	0.1579	0.3698
1819	M1818	0.5636	0.4533	0.4377	0.3742
1820	M1819	0.526	0.4424	0.4515	0.3613
1821	M1820	0.3757	0.4925	0.2496	0.2542
1822	M1821	0.6012	0.4455	0.4816	0.2541
1823	M1822	0.6012	0.4064	0.1889	0.1723
1824	M1823	0.4884	0.3406	0.6515	0.4491
1825	M1824	0.4884	0.4246	0.1313	0.1393
1826	M1825	0.4884	0.459	0.184	0.1318
1827	M1826	0.3757	0.5299	0.1389	0.1448
1828	M1827	0.7514	0.4169	0.5145	0.2463
1829	M1828	0.5636	0.4965	0.5837	0.283
1830	M1829	0.4509	0.4782	0.6897	0.2059
1831	M1830	0.4509	0.4959	0.2744	0.3262
1832	M1831	0.4133	0.5182	0.4325	0.236
1833	M1832	0.5636	0.3208	0.1842	0.3209
1834	M1833	0.4509	0.4711	0.1574	0.4243
1835	M1834	0.3006	0.5186	0.0652	0.2659
1836	M1835	0.526	0.4097	0.1202	0.327
1837	M1836	0.4884	0.4425	0.4302	0.3266
1838	M1837	0.4133	0.4401	0.1377	0.3882
1839	M1838	0.3757	0.3362	0.1293	0.346
1840	M1839	0.3757	0.4696	0.0529	0.3887
1841	M1840	0.263	0.4476	0.1135	0.2832
1842	M1841	0.4133	0.3658	0.1787	0.3615
1843	M1842	0.526	0.4584	0.1551	0.3076
1844	M1843	0.6012	0.4832	0.6772	0.4282
1845	M1844	0.5636	0.036	0.5071	0.4887
1846	M1845	0.4509	0.446	0.1135	0.4189
1847	M1846	0.4133	0.4567	0.1077	0.4279
1848	M1847	0.0751	0.4652	0.4712	0.4524
1849	M1848	0.4884	0.4106	0.1424	0.4176
1850	M1849	0.5636	0.689	0.2056	0.1193
1851	M1850	0.526	0.4605	0.3802	0.3615
1852	M1851	0.4509	0.4998	0.3307	0.405
1853	M1852	0.4133	0.4231	0.2116	0.2905
1854	M1853	0.4884	0.5388	0.5977	0.3195
1855	M1854	0.4133	0.3937	0.531	0.3547
1856	M1855	0.3757	0.5512	0.2451	0.2992
1857	M1856	0.5636	0.5306	0.2036	0.17
1858	M1857	0.3006	0.3409	0.2149	0.3017
1859	M1858	0.526	0.5495	0.259	0.3999
1860	M1859	0.4133	0.4432	0.2199	0.3869
1861	M1860	0.4133	0.4134	0.5932	0.3409
1862	M1861	0.6387	0.4835	0.2605	0.0726
1863	M1862	0.4133	0.4501	0.1502	0.3851
1864	M1863	0.4884	0.461	0.187	0.3835
1865	M1864	0.526	0.5376	0.1531	0.3812
1866	M1865	0.4884	0.4057	0.2201	0.2916
1867	M1866	0.4884	0.332	0.1162	0.3718
1868	M1867	0.4133	0.3893	0.1595	0.3526
1869	M1868	0.263	0.3059	0.1074	0.3371
1870	M1869	0.7139	0.4138	0.1868	0.3781
1871	M1870	0.6763	0.4688	0.2287	0.4012
1872	M1871	0.6012	0.4374	0.1991	0.4024
1873	M1872	0.526	0.1622	0.3082	0.499
1874	M1873	0.4133	0.4689	0.6382	0.439
1875	M1874	0.4884	0.4232	0.1965	0.3945
1876	M1875	0.4884	0.4935	0.1606	0.4218
1877	M1876	0.2254	0.3884	0.0968	0.3442
1878	M1877	0.526	0.4495	0.6524	0.2815
1879	M1878	0.5636	0.4549	0.2626	0.2782
1880	M1879	0.4884	0.1169	0.399	0.4199
1881	M1880	0.8642	0.4499	0.6025	0.1531
1882	M1881	0.6763	0.2232	0.3459	0.3204
1883	M1882	0.4133	0.3524	0.2841	0.3387
1884	M1883	0.526	0.421	0.3138	0.3845
1885	M1884	0.4884	0.2131	0.493	0.3815
1886	M1885	0.4509	0.4205	0.0908	0.4574
1887	M1886	0.7514	0.4392	0.1854	0.4403
1888	M1887	0.526	0.4751	0.3131	0.2988
1889	M1888	0.5636	0.4814	0.2804	0.3166
1890	M1889	0.4884	0.4528	0.165	0.2744
1891	M1890	0.3006	0.4262	0.1784	0.3728
1892	M1891	0.3382	0.3565	0.1407	0.3124
1893	M1892	0.3757	0.4335	0.1797	0.2997
1894	M1893	0.8266	0.4952	0.0966	0.1638
1895	M1894	0.789	0.4386	0.3347	0.4661
1896	M1895	0.7514	0.2927	0.4104	0.5136
1897	M1896	0.5636	0.4504	0.6409	0.4597
1898	M1897	0.4509	0.4699	0.2383	0.4354
1899	M1898	0.6012	0.3619	0.625	0.3404
1900	M1899	0.4133	0.4873	0.3744	0.2763
1901	M1900	0.8642	0.487	0.3649	0.3971
1902	M1901	0.4509	0.4188	0.3032	0.3219
1903	M1902	0.6387	0.1756	0.3453	0.3423
1904	M1903	0.526	0.3975	0.461	0.7522
1905	M1904	0.263	0.4632	0.627	0.2488
1906	M1905	0.3006	0.4105	0.6323	0.329
1907	M1906	0.3382	0.4152	0.2225	0.2208
1908	M1907	0.4884	0.0704	0.5534	0.387
1909	M1908	0.4133	0.3075	0.4491	0.4235
1910	M1909	0.526	0.4064	0.2106	0.3955
1911	M1910	0.4884	0.4969	0.1951	0.303
1912	M1911	0.4509	0.4545	0.1829	0.4168
1913	M1912	0.8266	0.4191	0.632	0.4082
1914	M1913	0.526	0.4255	0.1761	0.3595
1915	M1914	0.6012	0.3864	0.2452	0.3812
1916	M1915	0.4884	0.4344	0.2468	0.3313
1917	M1916	0.4884	0.4136	0.1583	0.2276
1918	M1917	0.3382	0.5051	0.1612	0.3211
1919	M1918	0.6387	0.4981	0.7222	0.3196
1920	M1919	0.4133	0.3761	0.1385	0.3146
1921	M1920	0.3006	0.353	0.2559	0.3785
1922	M1921	0.6763	0.41	0.1658	0.2359
1923	M1922	0.6763	0.2552	0.3351	0.4922
1924	M1923	0.6763	0.4824	0.2184	0.4923
1925	M1924	0.5636	0.6589	0.1138	0.426
1926	M1925	0.4133	0.5543	0.1857	0.4023
1927	M1926	0.4133	0.44	0.3106	0.352
1928	M1927	0.6763	0.3964	0.7475	0.8205
1929	M1928	0.4884	0.3341	0.5595	0.4416
1930	M1929	0.7514	0.3844	0.6668	0.3088
1931	M1930	0.4509	0.4414	0.178	0.1929
1932	M1931	0.6387	0.4151	0.3912	0.2971
1933	M1932	0.526	0.0885	0.6158	0.3694
1934	M1933	0.4884	0.4767	0.211	0.3666
1935	M1934	0.4133	0.4374	0.5162	0.436
1936	M1935	0.6012	0.4602	0.3317	0.4019
1937	M1936	0.789	0.3696	0.3178	0.7665
1938	M1937	0.7139	0.3406	0.1704	0.3623
1939	M1938	0.6012	0.4257	0.0469	0.3156
1940	M1939	0.5636	0.4746	0.6145	0.341
1941	M1940	0.526	0.4396	0.489	0.3359
1942	M1941	0.526	0.4017	0.097	0.3629
1943	M1942	0.8642	0.4399	0.1234	0.2211
1944	M1943	0.4133	0.479	0.1461	0.3511
1945	M1944	0.789	0.3885	0.1921	0.4228
1946	M1945	0.6763	0.4954	0.2196	0.4484
1947	M1946	0.789	0.4489	0.1645	0.4198
1948	M1947	0.4884	0.4835	0.2461	0.3951
1949	M1948	0.526	0.4905	0.1528	0.4108
1950	M1949	0.5636	0.3724	0.5653	0.3994
1951	M1950	0.526	0.4946	0.6681	0.3
1952	M1951	0.4884	0.5574	0.3053	0.4182
1953	M1952	0.4884	0.504	0.3033	0.1804
1954	M1953	0.5636	0.5713	0.2409	0.2991
1955	M1954	0.5636	0.446	0.0747	0.4075
1956	M1955	0.6012	0.4975	0.5784	0.2266
1957	M1956	0.526	0.4479	0.3262	0.2686
1958	M1957	0.1879	0.423	0.1623	0.2503
1959	M1958	0.263	0.2778	0.7129	0.7414
1960	M1959	0.9017	0.4953	0.1923	0.1296
1961	M1960	0.6387	0.39	0.5231	0.452
1962	M1961	0.526	0.4493	0.1741	0.3355
1963	M1962	0.4509	0.4479	0.1324	0.3462
1964	M1963	0.4133	0.4223	0.1334	0.3788
1965	M1964	0.6012	0.4935	0.3026	0.3711
1966	M1965	0.526	0.4581	0.1586	0.4189
1967	M1966	0.6012	0.3696	0.5151	0.3668
1968	M1967	0.526	0.7088	0.239	0.3574
1969	M1968	0.6012	0.483	0.2187	0.3096
1970	M1969	0.4884	0.4294	0.2111	0.3452
1971	M1970	0.4509	0.4887	0.1625	0.3562
1972	M1971	0.263	0.4683	0.385	0.3121
1973	M1972	0.3006	0.4442	0.2206	0.3022
1974	M1973	0.6387	0.4188	0.1907	0.3038
1975	M1974	0.6763	0.3934	0.1277	0.4315
1976	M1975	0.5636	0.5116	0.2285	0.4609
1977	M1976	0.4133	0.4689	0.1129	0.4255
1978	M1977	0.3757	0.511	0.186	0.3636
1979	M1978	0.4133	0.5308	0.5761	0.4131
1980	M1979	0.6763	0.4473	0.0989	0.31
1981	M1980	0.5636	0.4725	0.4103	0.3266
1982	M1981	0.5636	0.4264	0.187	0.2949
1983	M1982	0.7514	0.4759	0.25	0.3463
1984	M1983	0.3006	0.4784	0.4888	0.2629
1985	M1984	0.7139	0.4943	0.3828	0.2874
1986	M1985	0.6387	0.4597	0.3844	0.3605
1987	M1986	0.4509	0.4806	0.5485	0.3035
1988	M1987	0.4509	0.4864	0.4757	0.2945
1989	M1988	0.4509	0.5207	0.3456	0.3299
1990	M1989	0.1503	0.5498	0.0596	0.2965
1991	M1990	0.526	0.4471	0.2136	0.2861
1992	M1991	0.5636	0.4097	0.1147	0.2589
1993	M1992	0.4884	0.4332	0.1517	0.2223
1994	M1993	0.3006	0.4846	0.3288	0.2359
1995	M1994	0.3757	0.4382	0.2274	0.2536
1996	M1995	0.5636	0.539	0.4989	0.4327
1997	M1996	0.6012	0.4635	0.3914	0.3329
1998	M1997	0.4884	0.5005	0.1928	0.354
[truncated: 2 more rows]

## Sheet: Supplementary file 1b
Supplementary file 1b. The profile of the 479 mutants and the wild-type T-5.
No.	Strain	Swarming	Biomass	Biofilm	Antagonism	Monoculture average performance	Cluster category
1	T-5	0.526042	0.523017	0.718028	0.694915	0.69895	1
2	M1	0.604167	0.545219	0.628074	0.81356	0.750897	1
3	M2	0.03125	0.84356	0.00667243	0	0.0625669	3
4	M3	0.489583	0.442172	0.629927	0.805085	0.660604	1
5	M4	0.494792	0.455083	0.569134	0.81356	0.646834	1
6	M5	0.03125	0.623952	0.691215	0.855932	0.594403	1
7	M6	0.619792	0.402896	0.666625	0.822034	0.718818	1
8	M7	0.677083	0.495747	0.697146	0.805085	0.784736	1
9	M8	0.526042	0.553062	0.738663	0.762712	0.746653	1
10	M9	0.546875	0.572971	0.532435	0.838983	0.710732	1
11	M10	0.875	0.593906	0.720623	0.79661	0.909989	1
12	M11	0.0208333	0.713183	0.745212	0.686441	0.579634	3
13	M12	0.5	0.684766	0.492648	0.81356	0.710615	1
14	M13	0.484375	0.398612	0.51699	0.830509	0.605732	1
15	M14	0.442708	0.447722	0.734833	0.822034	0.693029	1
16	M15	0.5	0.316742	0	0.830509	0.370897	2
17	M16	0.510417	0.505038	0.714939	0.805085	0.728534	1
18	M17	0.489583	0.553122	0.631904	0.81356	0.709486	1
19	M18	0.494792	0.40905	0.561596	0.864407	0.645738	1
20	M19	0.505208	0.395777	0.828617	0.864407	0.752102	1
21	M20	0.692708	0.388899	0.713703	0.847458	0.771734	1
22	M21	0.03125	0.865219	0	0	0.0686012	3
23	M22	0.0677083	0.336229	0.538366	0.228814	0.179186	3
24	M23	0.666667	0.582986	0.665884	0.762712	0.78602	1
25	M24	0.536458	0.484284	0.646237	0.711865	0.665467	1
26	M25	0.513889	0.413876	0.550846	0.81356	0.630569	1
27	M26	0.463542	0.446275	0.716298	0.81356	0.68996	1
28	M27	0.479167	0.47089	0.672433	0.81356	0.6885	1
29	M28	0.361111	0.578582	0.703447	0.338983	0.505731	3
30	M29	0.03125	0.292368	0.782775	0.262712	0.258904	3
31	M30	0.734375	0.276139	0.661312	0.847458	0.722014	1
32	M31	0.614583	0.44917	0.525269	0.838983	0.685262	1
33	M32	0.453125	0.527119	0.788212	0.81356	0.747272	1
34	M33	0.53125	0.578582	0.565798	0.838983	0.720133	1
35	M34	0.536458	0.337979	0.815767	0.81356	0.715765	1
36	M35	0.473958	0.482413	0.619795	0.711865	0.628902	1
37	M36	0.682292	0.562413	0.513407	0.81356	0.743107	1
38	M37	0.401042	0.629261	0.641666	0.305085	0.503689	2
39	M38	0.53125	0.553363	0.740269	0.779661	0.756343	1
40	M39	0.0208333	0.585822	0.609292	0.90678	0.562344	1
41	M40	0.463542	0.427934	0.78537	0.779661	0.696737	1
42	M41	0.46875	0.356561	0.679105	0.79661	0.634135	1
43	M42	0.515625	0.321388	0.884715	0.889831	0.759168	1
44	M43	0.489583	0.47451	0.583467	0.847458	0.671979	1
45	M44	0.703125	0.59994	0.642778	0.822034	0.822108	1
46	M45	0	0.466425	0.862103	0	0.242566	3
47	M46	0.583333	0.5454	0.757939	0.81356	0.794871	1
48	M47	0.765625	0.585158	0.782157	0.889831	0.924739	1
49	M48	0.552083	0.52181	0.714074	0.932204	0.802899	1
50	M49	0.520833	0.372489	0.666008	0.81356	0.663069	1
51	M50	0.734375	0.526094	0.721488	0.847458	0.846885	1
52	M51	0.53125	0.295445	0.809094	0.847458	0.707504	1
53	M52	0.473958	0.371946	0.758063	0.423729	0.52408	2
54	M53	0.677083	0.421297	0.761522	0.805085	0.78068	1
55	M54	0.46875	0.552036	0.954158	0.830509	0.837237	1
56	M55	0.479167	0.254962	0.776226	0.59322	0.554633	1
57	M56	0.583333	0.212066	0.989868	0.779661	0.740392	1
58	M57	0.453125	0.796983	0.467935	0.5	0.600722	2
59	M58	0.625	0.39638	0.934882	0.711865	0.781944	1
60	M59	0.479167	0.761026	0.845422	0.254237	0.649767	2
61	M60	0.5	0.465038	0.612628	0.855932	0.687513	1
62	M61	0.489583	0.3746	0.557395	0.847458	0.621254	1
63	M62	0.567708	0.213695	0.820091	0.855932	0.697108	1
64	M63	0.484375	0.589321	0.591252	0.779661	0.691947	1
65	M64	0.880208	0.229985	0.856172	0.745763	0.799661	1
66	M65	0.723958	0.276983	0.935253	0.81356	0.814811	1
67	M66	0.296875	0.371885	0.719016	0.457627	0.450682	3
68	M67	0.822917	0.213575	0.825775	0.81356	0.785044	1
69	M68	0.536458	0.554148	0.709131	0.889831	0.790577	1
70	M69	0.473958	0.560181	0.809465	0.81356	0.77753	1
71	M70	0.59375	0.485852	0.793649	0.889831	0.820177	1
72	M71	0.0416667	0.472278	0.916718	0.864407	0.631736	1
73	M72	0.96875	0.226546	0.820462	0	0.519274	2
74	M73	0.619792	0.393243	0.864327	0.79661	0.784298	1
75	M74	1	0.299487	0.843816	0.59322	0.809484	2
76	M75	0.8125	0.245551	0.853824	0.81356	0.805019	1
77	M76	0.65625	0.293756	0.894847	0.79661	0.771208	1
78	M77	0.458333	0.844827	0.714445	0.288136	0.636032	2
79	M78	0.0833333	0.429985	0.831336	0.830509	0.583456	1
80	M79	0.479167	0.329231	0.936118	0.762712	0.717159	1
81	M80	0.364583	0.353002	0.920301	0.20339	0.44902	3
82	M81	0.0625	0.824434	0.79785	0.516949	0.594155	3
83	M82	0.572917	1	0.0077845	0.745763	0.644377	2
84	M83	0.536458	0.351674	0.74583	0.508475	0.57028	2
85	M84	0.5625	0.511373	0.703077	0.771187	0.733631	1
86	M85	0.59375	0.463831	0.730879	0.627119	0.680258	2
87	M86	0.4375	0.491704	0.639936	0.864407	0.687493	1
88	M87	0.59375	0.518492	0.751884	0.847458	0.799442	1
89	M88	0.46875	0.422443	0.850365	0.779661	0.722793	1
90	M89	0.65625	0.501176	0.938712	0.864407	0.899684	1
91	M90	0.0625	0.658401	0.00518967	0	0	3
92	M91	0.885417	0.455505	0.81762	0.516949	0.78491	2
93	M92	0.572917	0.593544	0.69208	0.79661	0.77672	1
94	M93	0.473958	0.652247	0.890399	0.81356	0.847187	1
95	M94	0.526042	0.526817	0.619918	0.805085	0.705336	1
96	M95	0.5	0.242836	0.890399	0.847458	0.706475	1
97	M96	0.4375	0.472398	0.713333	0.805085	0.685386	1
98	M97	0.427083	0.288265	0.824663	0.898305	0.689413	1
99	M98	0.510417	0.310588	0.687137	0.79661	0.635635	1
100	M99	0.463542	0.300332	0.745953	0.61017	0.561244	1
101	M100	0.46875	0.314691	0.8731	0.974577	0.767043	1
102	M101	0.5	0.35813	0.925491	1	0.828447	1
103	M102	0.555556	0.540573	0.862227	0.711865	0.782787	1
104	M103	0.640625	0.466063	0.825652	0.779661	0.79961	1
105	M104	0.515625	0.276139	0.789201	0.79661	0.664956	1
106	M105	0.576389	0.382262	0.765353	0.79661	0.72255	1
107	M106	0.4375	0.848024	0.573706	0.79661	0.776997	1
108	M107	0.536458	0.519819	0.814778	0.79661	0.781759	1
109	M108	0.697917	0.559759	0.705919	0.847458	0.839492	1
110	M109	0.479167	0.80724	0.853454	0.79661	0.889991	1
111	M110	0.479167	0.24537	0.916965	0.79661	0.689331	1
112	M111	0.65625	0.596923	0.36859	0.889831	0.718918	1
113	M112	0.635417	0.439578	0.88002	0.966102	0.883808	1
114	M113	0.552083	0.208326	0.810453	0.745763	0.640415	1
115	M114	0.703125	0.30902	0.851477	0	0.458017	2
116	M115	0.541667	0.428175	0.79229	0.81356	0.744726	1
117	M116	0.0520833	0.829804	0.355122	0	0.205717	3
118	M117	0.0416667	0.324646	0.836278	0.237288	0.287401	3
119	M118	0.677083	0.451463	0.850859	0.822034	0.835621	1
120	M119	0.755208	0.473002	0.867046	0.915254	0.919802	1
121	M120	0.765625	0.358371	0.787841	0.677966	0.750408	1
122	M121	0.510417	0.226244	0.828988	0.881356	0.692912	1
123	M122	0.96875	0.422443	0.295317	0.762712	0.693804	2
124	M123	0.489583	0.323861	0.8516	0.898305	0.739757	1
125	M124	0.791667	0.568507	0.84987	0.779661	0.911425	1
126	M125	0.479167	0.328808	0.798962	0.932204	0.730009	1
127	M126	0.53125	0.507632	0.723835	0.762712	0.724488	1
128	M127	0.526042	0.52006	0.822686	0.79661	0.780846	1
129	M128	0.619792	0.446998	0.815272	0.847458	0.806664	1
130	M129	0.78125	0.320302	0.811318	0.762712	0.784946	1
131	M130	0.479167	0.381237	0.88002	0.81356	0.735985	1
132	M131	0.520833	0.429925	0.852218	0.898305	0.795294	1
133	M132	0.947917	0.808205	0.394786	0.898305	0.935385	2
134	M133	0.802083	0.460513	0.786976	0.79661	0.853637	1
135	M134	0.625	0.481388	0.286297	0.79661	0.589147	2
136	M135	0.567708	0.45448	0.877672	0.932204	0.847952	1
137	M136	0.520833	0.464012	0.856296	0.677966	0.721943	1
138	M137	0.833333	0.383952	0.818114	0.677966	0.800159	1
139	M138	0.630208	0.434268	0.841097	0.81356	0.802482	1
140	M139	0.463542	0.259125	0.756827	0.881356	0.658222	1
141	M140	0.5	0.284465	0.772396	0.847458	0.675724	1
142	M141	0.546875	0.461116	0.80168	0.81356	0.763867	1
143	M142	0.0625	0	0.91227	0.81356	0.427701	1
144	M143	0.453125	0.56187	1	0.79661	0.839715	1
145	M144	0.563616	0.546012	0.701083	0.5108	0.642382	2
146	M145	0	0.550743	0.664702	0.426898	0.368921	3
147	M146	0.225446	0.532196	0.764749	0.361755	0.466281	3
148	M147	0.676339	0.532858	0.434401	0.517969	0.577982	2
149	M148	0.60119	0.494439	0.440031	0.51762	0.534381	2
150	M149	0.901786	0.606764	0.414478	0.791806	0.80075	2
151	M150	0.0751488	0.488004	0.52676	0.46951	0.335534	3
152	M151	0.488467	0.497751	0.673689	0.783499	0.691462	1
153	M152	0.563616	0.522165	0.512251	0.839168	0.688963	1
154	M153	0	0.528978	0.673689	0.474326	0.382873	3
155	M154	0.413318	0.481569	0.60147	0.594858	0.549655	2
156	M155	0.676339	0.456871	0.452591	0.515367	0.553663	2
157	M156	0.60119	0.541942	0.54809	0.861116	0.735323	1
158	M157	0.526042	0.53371	0.837401	0.882845	0.826988	1
159	M158	0.563616	0.517055	0.727719	0.867675	0.78514	1
160	M159	0.0751488	0.525666	0.69123	0.444218	0.406737	3
161	M160	0.413318	0.526802	0.801671	0.848604	0.750646	1
162	M161	0.33817	0.501441	0.780124	0.781682	0.674556	1
163	M162	0	0.545444	0.629188	0.337321	0.316421	3
164	M163	0.676339	0.511756	0.731616	0.506203	0.68442	2
165	M164	0	0.453085	0.598546	0.436915	0.306996	3
166	M165	0.563616	0.44542	0.664594	0.548811	0.602493	2
167	M166	0.526042	0.538914	0.548956	0.503306	0.560126	2
168	M167	0.33817	0.443055	0.721872	0.515594	0.520454	2
169	M168	0.676339	0.485922	0.57256	0.501629	0.608133	2
170	M169	0.300595	0.546769	0.758036	0.622436	0.604665	1
171	M170	0.375744	0.460656	0.676504	0.726463	0.609308	1
172	M171	0.676339	0.532006	0.676288	0.539013	0.683507	2
173	M172	0.413318	0.534372	0.68116	0.840024	0.701717	1
174	M173	0.450893	0.517244	0.85007	0.762191	0.746621	1
175	M174	0	0.483272	0.603094	0.306432	0.268444	3
176	M175	0.526042	0.482042	0.439598	0.699735	0.572285	2
177	M176	0.0375744	0.510904	0.555561	0.311803	0.277722	3
178	M177	0.60119	0.494155	0.453132	0.579473	0.564447	2
179	M178	0	0.503807	0.741145	0.290749	0.325982	3
180	M179	0.0375744	0.480339	0.552421	0.357882	0.282705	3
181	M180	0	0.663352	0.700541	0.384384	0.411575	3
182	M181	0	0.609886	0.783047	0.241765	0.365843	3
183	M182	0	0.546769	0.635685	0.416899	0.351611	3
184	M183	0.676339	0.469362	0.493302	0.556653	0.591708	2
185	M184	0.225446	0.595597	0.819861	0.264969	0.47503	3
186	M185	0.0375744	0.556326	0.800588	0.247407	0.368741	3
187	M186	0.0375744	0.490275	0.656149	0.283801	0.298642	3
188	M187	0.0375744	0.648117	0.768647	0.0919547	0.330247	3
189	M188	0	0.662122	0.904965	0.180832	0.41143	3
190	M189	0	0.583769	0.738221	0.451436	0.421701	3
191	M190	0.488467	0.516203	0.510843	0.500208	0.519259	2
192	M191	0.413318	0.447124	0.729343	0.59601	0.587737	1
193	M192	0.225446	0.593989	0.75024	0.492987	0.538159	3
194	M193	0.450893	0.481285	0.636334	0.515978	0.546948	2
195	M194	0.375744	0.525193	0.707255	0.867031	0.704273	1
196	M195	0.563616	0.508444	0.679428	0.826386	0.745605	1
197	M196	0.488467	0.430469	0.784455	0.802761	0.716726	1
198	M197	0.488467	0.405298	0.595298	0.758384	0.612561	1
199	M198	0.526042	0.450152	0.748507	0.872534	0.7534	1
200	M199	0.676339	0.338395	0.88082	0.603952	0.71405	1
201	M200	0.563616	0.387697	0.78478	0.827399	0.739814	1
202	M201	0.488467	0.507687	0.561083	0.841747	0.673576	1
203	M202	0.375744	0.500022	0.715159	0.746	0.648588	1
204	M203	0	0.517717	0.63536	0.491749	0.369921	3
205	M204	0.563616	0.473809	0.69307	0.829378	0.738357	1
206	M205	0.676339	0.49406	0.611756	0.814428	0.753138	1
207	M206	0.526042	0.482704	0.704764	0.771531	0.708227	1
208	M207	0.563616	0.497183	0.623449	0.511779	0.591857	2
209	M208	0.563616	0.470119	0.60396	0.699892	0.648855	1
210	M209	0.300595	0.538157	0.743743	0.82242	0.675965	1
211	M210	0.526042	0.532858	0.769296	0.573558	0.674691	2
212	M211	0.563616	0.531533	0.500232	0.546606	0.570099	2
213	M212	0.450893	0.433308	0.551121	0.614785	0.533104	2
214	M213	0.676339	0.530776	0.630162	0.886039	0.804166	1
215	M214	0.563616	0.439553	0.73519	0.768581	0.717044	1
216	M215	0.563616	0.42129	0.75901	0.500659	0.611405	2
217	M216	0.526042	0.495669	0.526435	0.542211	0.54931	2
218	M217	0.488467	0.411543	0.752947	0.741317	0.67168	1
219	M218	0.450893	0.519421	0.754787	0.704023	0.685712	1
220	M219	0.450893	0.523111	0.7314	0.806325	0.718972	1
221	M220	0.413318	0.35628	0.812282	0.793751	0.664173	1
222	M221	0.413318	0.434443	0.702274	0.805644	0.65614	1
223	M222	0.488467	0.468794	0.632436	0.781312	0.662313	1
224	M223	0.563616	0.500589	0.425197	0.505554	0.510898	2
225	M224	0.526042	0.526991	0.670657	0.784991	0.717745	1
226	M225	0.488467	0.535318	0.686574	0.767309	0.705258	1
227	M226	0.60119	0.492262	0.636767	0.51422	0.61135	2
228	M227	0.563616	0.547904	0.53174	0.813317	0.696766	1
229	M228	0.676339	0.417694	0.568879	0.528245	0.589896	2
230	M229	0.450893	0.545633	0.646404	0.535897	0.584932	2
231	M230	0.375744	0.523395	0.596814	0.501761	0.512008	2
232	M231	0.488467	0.5004	0.631462	0.768707	0.669571	1
233	M232	0.526042	0.531249	0.50662	0.531594	0.551383	2
234	M233	0	0.461507	0.734107	0.270328	0.297895	3
235	M234	0.563616	0.50551	0.514958	0.552215	0.567808	2
236	M235	0.638765	0.42905	0.546682	0.515081	0.565102	2
237	M236	0	0.538536	0.542026	0.369247	0.291399	3
238	M237	0.563616	0.474377	0.601036	0.502944	0.570093	2
239	M238	0.112723	0.453464	0.567146	0.422596	0.334128	3
240	M239	0.187872	0.515446	0.636984	0.444368	0.426228	3
241	M240	0	0.521408	0.668925	0.462701	0.373226	3
242	M241	0.60119	0.169008	0.940804	0.74539	0.696691	1
243	M242	0	0.509011	0.587935	0.310202	0.274222	3
244	M243	0.676339	0.372556	0.647595	0.529942	0.604099	2
245	M244	0.60119	0.499265	0.567038	0.507781	0.583501	2
246	M245	0.225446	0.479676	0.617603	0.405217	0.403387	3
247	M246	0	0.535508	0.541377	0.453572	0.323871	3
248	M247	0.0751488	0.494533	0.570394	0.334127	0.301221	3
249	M248	0	0.569764	0.836752	0.289288	0.390446	3
250	M249	0	0.542226	0.746775	0.336487	0.362135	3
251	M250	0	0.574211	0.612838	0.389718	0.342518	3
252	M251	0.60119	0.614429	0.449343	0.577752	0.610655	2
253	M252	0.112723	0.484786	0.808492	0.362728	0.41981	3
254	M253	0.300595	0.454221	0.727177	0.633809	0.559555	1
255	M254	0	0.506646	0.514524	0.435976	0.294353	3
256	M255	0.60119	0.485733	0.640016	0.500976	0.604697	2
257	M256	0.563616	0.513081	0.777417	0.651483	0.716503	1
258	M257	0.676339	0.357888	0.667301	0.545552	0.612413	2
259	M258	0.263021	0.405108	0.60959	0.674548	0.49371	1
260	M259	0.60119	0.494722	0.514741	0.526403	0.568113	2
261	M260	0.526042	0.542605	0.475004	0.686794	0.605715	2
262	M261	0.187872	0.502387	0.620743	0.414287	0.402319	3
263	M262	0	0.527464	0.659613	0.364784	0.33249	3
264	M263	0.563616	0.475134	0.559675	0.514486	0.558391	2
265	M264	0.263021	0.54393	0.546682	0.547762	0.473226	3
266	M265	0.187872	0.452234	0.634385	0.466637	0.408696	3
267	M266	0.526042	0.527843	0.462552	0.56138	0.544261	2
268	M267	0.0375744	0.470876	0.767889	0.0750616	0.251776	3
269	M268	0.0751488	0.537873	0.857866	0.343313	0.438118	3
270	M269	0.225446	0.533804	0.645754	0.392742	0.431493	3
271	M270	0.488467	0.54904	0.855917	0.817301	0.799096	1
272	M271	0.563616	0.502103	0.815422	0.699181	0.746591	1
273	M272	0.187872	0.555191	0.77471	0.213308	0.404651	3
274	M273	0.150298	0.581971	0.717541	0.248911	0.391621	3
275	M274	0.150298	0.480339	0.77536	0.303671	0.396029	3
276	M275	0.60119	0.476554	0.863712	0.771658	0.800058	1
277	M276	0.33817	0.539671	0.72577	0.860131	0.69965	1
278	M277	0.0751488	0.495479	0.723063	0.427468	0.400656	3
279	M278	0.112723	0.52472	0.581439	0.310497	0.323437	3
280	M279	0.375744	0.545254	0.750781	0.863992	0.728653	1
281	M280	0.0751488	0.56948	0.540186	0.43095	0.358219	3
282	M281	0.33817	0.540239	0.723063	0.858999	0.698333	1
283	M282	0.187872	0.450247	0.570936	0.418786	0.363082	3
284	M283	0.526042	0.467848	0.773952	0.831176	0.754118	1
285	M284	0.112723	0.459047	0.562057	0.37396	0.314743	3
286	M285	0.112723	0.492167	0.540944	0.439055	0.345788	3
287	M286	0.60119	0.486395	0.695019	0.507356	0.629679	2
288	M287	0.225446	0.477973	0.597896	0.378534	0.384023	3
289	M288	0.112723	0.561815	0.509327	0.470465	0.373748	3
290	M289	0	0.471538	0.686141	0.304064	0.296204	3
291	M290	0.526042	0.608751	0.423465	0.737308	0.631935	2
292	M291	0.112723	0.55396	0.548631	0.420713	0.366378	3
293	M292	0.263021	0.533426	0.648244	0.512105	0.495533	3
294	M293	0.112723	0.562288	0.825708	0.383258	0.466213	3
295	M294	0.150298	0.515257	0.64727	0.266009	0.34335	3
296	M295	0.563616	0.408704	0.693937	0.774424	0.690365	1
297	M296	0.187872	0.47873	0.684625	0.400889	0.41312	3
298	M297	0.526042	0.433308	0.606125	0.794155	0.65773	1
299	M298	0.150298	0.495669	0.641098	0.432573	0.400043	3
300	M299	0.60119	0.513175	0.525785	0.666996	0.636599	2
301	M300	0.187872	0.490275	0.570503	0.482517	0.404685	3
302	M301	0.526042	0.618498	0.26116	0.721684	0.564219	2
303	M302	0	0.539293	0.763449	0.269093	0.340532	3
304	M303	0	0.48507	0.631462	0.30779	0.281137	3
305	M304	0	0.476837	0.52925	0.254947	0.21539	3
306	M305	0.150298	0.53759	0.615329	0.355258	0.375416	3
307	M306	0.263021	0.440689	0.727069	0.851994	0.626785	1
308	M307	0.187872	0.467753	0.787703	0.305085	0.411629	3
309	M308	0.375744	0.532006	0.729126	0.867718	0.716099	1
310	M309	0.375744	0.515635	0.713751	0.504364	0.557016	2
311	M310	0.413318	0.467469	0.772328	0.800731	0.695666	1
312	M311	0.225446	0.568723	0.69307	0.289761	0.42314	3
313	M312	0	0.457249	0.733999	0.232474	0.280895	3
314	M313	0	0.466901	0.729343	0.194407	0.267579	3
315	M314	0	0.502293	0.596705	0.384973	0.305154	3
316	M315	0.150298	0.472485	0.647595	0.372955	0.369319	3
317	M316	0.413318	0.496899	0.557293	0.829328	0.632448	1
318	M317	0.0751488	0.503334	0.562815	0.306681	0.290662	3
319	M318	0	0.505889	0.76215	0.335486	0.353291	3
320	M319	0	0.539198	0.603527	0.311236	0.293071	3
321	M320	0.526042	0.52737	0.644238	0.792963	0.71047	1
322	M321	0.488467	0.424602	0.735947	0.770805	0.681966	1
323	M322	0.563616	0.439175	0.746775	0.526629	0.624136	2
324	M323	0	0.534183	0.561408	0.471116	0.338467	3
325	M324	0.563616	0.475418	0.61652	0.796819	0.695073	1
326	M325	0.263021	0.478352	0.733024	0.799072	0.623038	1
327	M326	0.0375744	0.588027	0.721763	0.464266	0.437084	3
328	M327	0	0.456492	0.55123	0.242615	0.211083	3
329	M328	0.563616	0.463495	0.74959	0.723831	0.714463	1
330	M329	0.450893	0.379369	0.745692	0.71425	0.629777	1
331	M330	0.488467	0.489139	0.696427	0.7344	0.677381	1
332	M331	0.526042	0.428387	0.858732	0.779934	0.751733	1
333	M332	0.563616	0.505699	0.738005	0.782208	0.750297	1
334	M333	0.526042	0.482515	0.783156	0.755266	0.733165	1
335	M334	0.488467	0.465009	0.785862	0.832009	0.742977	1
336	M335	0.488467	0.452328	0.748183	0.615627	0.635575	1
337	M336	0	0.454505	0.756953	0.352591	0.337397	3
338	M337	0.638765	0.521029	0.729126	0.679216	0.741684	1
339	M338	0.676339	0.479582	0.801887	0.832563	0.831165	1
340	M339	0.676339	0.458385	0.772761	0.764372	0.783446	1
341	M340	0.676339	0.461034	0.705089	0.749635	0.751332	1
342	M341	0.563616	0.501346	0.691338	0.902845	0.778328	1
343	M342	0.413318	0.477689	0.736489	0.527199	0.575216	2
344	M343	0.488467	0.502482	0.571694	0.510011	0.542182	2
345	M344	0.60119	0.537779	0.770054	0.748502	0.777676	1
346	M345	0.263021	0.547904	0.680077	0.822217	0.639044	1
347	M346	0.0751488	0.538347	0.580572	0.286828	0.303916	3
348	M347	0.488467	0.149325	0.536721	0.512605	0.38695	2
349	M348	0.300595	0.497656	0.595081	0.537327	0.485009	2
350	M349	0.375744	0.485827	0.641098	0.826026	0.645275	1
351	M350	0.526042	0.493776	0.327966	0.514324	0.457408	2
352	M351	0.375744	0.531439	0.766806	0.883034	0.737209	1
353	M352	0.300595	0.368676	0.742444	0.8795	0.630184	1
354	M353	0.60119	0.503807	0.718732	0.861797	0.78895	1
355	M354	0.375744	0.377382	0.624099	0.760244	0.568279	1
356	M355	0.488467	0.367824	0.638825	0.832742	0.644938	1
357	M356	0.488467	0.393942	0.723712	0.656525	0.618681	1
358	M357	0.375744	0.51819	0.602552	0.675658	0.582241	1
359	M358	0.300595	0.506078	0.641856	0.613623	0.537954	1
360	M359	0.263021	0.464725	0.685924	0.862451	0.624106	1
361	M360	0.450893	0.470876	0.708987	0.813632	0.691857	1
362	M361	0.526042	0.408799	0.762475	0.717013	0.679755	1
363	M362	0.563616	0.334042	0.756845	0.906452	0.738792	1
364	M363	0.375744	0.410786	0.607966	0.565625	0.496872	2
365	M364	0.375744	0.0697419	0.630487	0.603157	0.383733	1
366	M365	0.300595	0.46217	0.656149	0.739918	0.576881	1
367	M366	0.300595	0.423277	0.58512	0.556642	0.458828	2
368	M367	0.60119	0.509011	0.450209	0.597658	0.576574	2
369	M368	0.60119	0.311709	0.592266	0.764035	0.62132	1
370	M369	0.413318	0.542889	0.615654	0.844697	0.680652	1
371	M370	0.263021	0.393753	0.664486	0.614278	0.486973	1
372	M371	0.33817	0.543078	0.588476	0.710566	0.585521	1
373	M372	0.375744	0.410975	0.642181	0.802922	0.60627	1
374	M373	0.33817	0.44949	0.763233	0.791157	0.650652	1
375	M374	0	0.573549	0.511818	0.407503	0.308737	3
376	M375	0.300595	0.506835	0.685058	0.879081	0.662538	1
377	M376	0.375744	0.524815	0.646837	0.55179	0.552865	2
378	M377	0.488467	0.472579	0.617603	0.749399	0.645015	1
379	M378	0.33817	0.518853	0.623449	0.855772	0.648314	1
380	M379	0.33817	0.48119	0.648244	0.857838	0.643965	1
381	M380	0.300595	0.4493	0.652575	0.851744	0.615286	1
382	M381	0.33817	0.514878	0.601036	0.647876	0.553982	1
383	M382	0.488467	0.541753	0.64976	0.816941	0.71301	1
384	M383	0.488467	0.399052	0.687115	0.676908	0.61421	1
385	M384	0.413318	0.531533	0.73205	0.762856	0.689993	1
386	M385	0.563616	0.499832	0.535746	0.752569	0.654563	1
387	M386	0.563616	0.443055	0.750132	0.713786	0.702407	1
388	M387	0.676339	0.428766	0.599845	0.594389	0.633455	2
389	M388	0.450893	0.538347	0.665893	0.51638	0.581987	2
390	M389	0.375744	0.512513	0.526651	0.521281	0.487236	2
391	M390	0.526042	0.363566	0.669683	0.692332	0.614242	1
392	M391	0.638765	0.0346344	0.689389	0.671224	0.526624	1
393	M392	0.526042	0.566451	0.499691	0.532727	0.563223	2
394	M393	0.638765	0.496804	0.77222	0.826462	0.808569	1
395	M394	0.300595	0.156801	0.620959	0.525731	0.353517	2
396	M395	0.450893	0.511566	0.69307	0.583352	0.609112	2
397	M396	0.450893	0.537684	0.681052	0.529965	0.593294	2
398	M397	0.638765	0.517055	0.638608	0.803103	0.753519	1
399	M398	0.375744	0.162479	0.67867	0.674032	0.46901	1
400	M399	0.375744	0.480149	0.763125	0.687984	0.636541	1
401	M400	0.450893	0.543551	0.757711	0.815916	0.741658	1
402	M401	0	0.551973	0.635901	0.471003	0.375579	3
403	M402	0.676339	0.20298	0.715375	0.779664	0.663661	1
404	M403	0.33817	0.379275	0.695777	0.64461	0.536214	1
405	M404	0.300595	0.339152	0.662753	0.696052	0.512346	1
406	M405	0.375744	0.418735	0.627672	0.833539	0.61588	1
407	M406	0.33817	0.500495	0.651493	0.689371	0.585214	1
408	M407	0.375744	0.478446	0.613596	0.87282	0.650071	1
409	M408	0.33817	0.536738	0.593782	0.595795	0.538893	2
410	M409	0.638765	0.508065	0.6686	0.812746	0.765859	1
411	M410	0.638765	0.535224	0.634493	0.525066	0.647229	2
412	M411	0.563616	0.521029	0.574726	0.537702	0.592279	2
413	M412	0.263021	0.514595	0.51918	0.877754	0.58321	1
414	M413	0.488467	0.419492	0.639474	0.62533	0.58249	2
415	M414	0.563616	0.577334	0.392065	0.529231	0.537992	2
416	M415	0.33817	0.0797726	0.691338	0.659176	0.419699	1
417	M416	0.112723	0.591528	0.667626	0.432573	0.434192	3
418	M417	0.263021	0.185757	0.657448	0.568617	0.382007	1
419	M418	0.187872	0.510715	0.550472	0.480381	0.40399	3
420	M419	0.375744	0.372272	0.592807	0.829808	0.581632	1
421	M420	0.526042	0.42886	0.643805	0.783803	0.666943	1
422	M421	0.676339	0.500684	0.76594	0.805913	0.814457	1
423	M422	0.187872	0.512418	0.560758	0.410098	0.380519	3
424	M423	0.300595	0.271113	0.713968	0.746928	0.526057	1
425	M424	0.112723	0.6026	0.714942	0.206277	0.366586	3
426	M425	0.526042	0.460656	0.431044	0.662734	0.545332	2
427	M426	0.60119	0.460088	0.833179	0.776788	0.7832	1
428	M427	0.375744	0.474661	0.524269	0.806718	0.585965	1
429	M428	0.375744	0.426305	0.694045	0.738398	0.607345	1
430	M429	0.526042	0.451855	0.657015	0.779875	0.679939	1
431	M430	0.563616	0.511756	0.262893	0.815248	0.574739	2
432	M431	0.563616	0.544214	0.502181	0.7431	0.655106	2
433	M432	0.413318	0.418546	0.657881	0.541498	0.525508	2
434	M433	0.375744	0.464252	0.664919	0.71184	0.600203	1
435	M434	0.526042	0.410786	0.568879	0.809377	0.639795	1
436	M435	0.526042	0.521029	0.633736	0.775335	0.69659	1
437	M436	0.450893	0.400755	0.643047	0.784203	0.625225	1
438	M437	0.563616	0.517812	0.586203	0.84826	0.720648	1
439	M438	0.60119	0.479014	0.64413	0.794109	0.721675	1
440	M439	0.33817	0.19011	0.578407	0.681566	0.42767	1
441	M440	0.676339	0.396402	0.747533	0.820532	0.770944	1
442	M441	0.263021	0.277832	0.712885	0.741403	0.510972	1
443	M442	0.33817	0.498886	0.659613	0.638834	0.567488	1
444	M443	0.526042	0.45829	0.424764	0.802852	0.598268	1
445	M444	0.526042	0.60771	0.627889	0.485878	0.61259	2
446	M445	0.413318	0.717669	0.562815	0.412019	0.555537	2
447	M446	0.676339	0.726281	0.728693	0.478473	0.758454	2
448	M447	0.488467	0.599004	0.778716	0.464604	0.646119	2
449	M448	0.187872	0.713127	0.564656	0.567454	0.52626	3
450	M449	0.33817	0.609886	0.683001	0.512317	0.570657	2
451	M450	0.638765	0.65228	0.634602	0.498579	0.68374	2
452	M451	0.713914	0.525193	0.714509	0.924029	0.866305	1
453	M452	0.676339	0.475134	0.506079	0.454195	0.557923	2
454	M453	0.676339	0.579321	0.601361	0.870386	0.805813	1
455	M454	0.563616	0.43662	0.714509	0.465391	0.585459	2
456	M455	0.713914	0.525193	0.589668	0.537155	0.660267	2
457	M456	0.713914	0.368108	0.684084	0.550573	0.640436	2
458	M457	0	0.501441	0.503589	0.651562	0.374658	3
459	M458	0.187872	0.431131	0.668817	0.466763	0.414114	3
460	M459	0.789062	0.602505	0.630487	0.432527	0.695962	2
461	M460	0.413318	0.63184	0.649002	0.517357	0.598095	2
462	M461	0.33817	0.544497	0.629621	0.452378	0.498702	2
463	M462	0.789062	0.483651	0.878979	0.482572	0.76831	2
464	M463	0.187872	0.521029	0.821918	0.781266	0.638587	1
465	M464	0.225446	0.471538	0.828848	0.810655	0.648412	1
466	M465	0.676339	0.49283	0.699784	0.415049	0.62728	2
467	M466	0.976935	0.554528	0.886125	0.792102	1	1
468	M467	0.526042	0.631746	0.732591	0.481177	0.662532	2
469	M468	0.563616	0.599193	0.654849	0.459969	0.624713	2
470	M469	0.789062	0.453843	0.550797	0.501703	0.631871	2
471	M470	0.33817	0.604209	0.710936	0.454416	0.556305	3
472	M471	0.413318	0.610549	0.706497	0.469622	0.593451	2
473	M472	0.225446	0.491221	0.94546	0.845319	0.717248	1
474	M473	0.751488	0.574306	0.784238	0.489048	0.754143	2
475	M474	0.826637	0.563991	0.545816	0.475025	0.678603	2
476	M475	0.751488	0.552825	0.945027	0.871184	0.964098	1
477	M476	0.676339	0.499643	0.650843	0.49504	0.642525	2
478	M477	0.300595	0.572981	0.730642	0.815907	0.682088	1
479	M478	0.901786	0.495385	0.192297	0.129606	0.399816	2
480	M479	0.901786	0.0871537	0.319087	0.239639	0.3308	2
Note:Mutants in bold-type letters were uesd in the single mutant greenhouse experiments.

## Sheet: Supplementary file 1c
Supplementary file 1c. The profile of the selected mutants used in the single mutant greenhouse experiment.
Cluster category	Strain	Gene disrupted	Gene function	Sequences
1	T-5	-	-	-
1	M1	yraB	Biological process	CAAGCTTGCATGCCTGCAGGTCGACGATTGGGACCACCTATGATGTAGAACGGGAATACGGACAACGAATCTGTCAGTGACAACTATTTTCTGGCTGTAGCCTCCGTACGTAGGGTTTCCGTCGTAGTCCAGGTTATTATAGGTCTGAACAACGCCTTTTGTGCAATATTGTTCGTCTCCGTTCAGGCAGTATTCACATTCCCCGCAGGAGTCTACAAAACAGCCGACACCCACACGGTCGCCGGCGGCAAATGTGGTGACTTCTTCACCCACGGCTTCCACAACTCCGGCAATTTCGTGCCCGGGAACCATCGGAAAGATTCCGCCGCCCCATTCATCGAATGCGCTGTGGATGTCTGAGTGACAAATCCCGCTGTACTTAATATCAATCAGGATATC…
1	M38	nhaC	Biological process	aaaatttaacatgattacgccaagcttgcatgcctgcaggtcgacgattgggaccacctatgatgtagaacgggaaaaggACATGATGCTATGGCTGGAAGGAAAGCTGCCTGTTCCAAAGGTCCTGCACTTTGAACGGCATGATGGCTGGAGCAATCTGCTCATGAGTGAGGCCGATGGCGTCCTTTGCTCGGAAGAGTATGAAGATGAACAAAGCCCTGAAAAGATTATCGAGCTGTATGCGGAGTGCATCAGGCTCTTTCACTCCATCGACATATCGGATTGTCCCTATACGAATAGCTTAGACAGCCGCTTAGCCGAATTGGATTACTTACTGAATAACGATCTGGCCGATGTGGATTGCGAAAACTGGGAAGAAGACACTCCATTTAAAGATCC…
1	M54	hutU	Biological process	ACAAGCGGCTCTTCATTGCTCGTTTTTTTCGTGAGATCGTCACGGTAAAGGGTGATATCGATTTCCCCGACGGTGACCGGATTCCCTTCAATCTGTTCGATCCGCTCGGCCAGCCGCTTCGCTAAATAAATGCCTCTTGTTTTAATTCCTACAAGAATGCAGTCATTCATTCCTTTATTCCGTTCGATCATTTCATGGGCTATCCTTGTCAGCGCCCGCCTGATCGCCTGTTCGTCGAGAATAACAGCTTTTTGATTCACTCGTGACACCTCTCCATTCGTATATAAGAAGAAAAAAACCCCCTCCC
1	M100	comA	Biological process	GAAAGCTGCCTGTTCCAAAGGTCCTGCACTTTGAACGGCATGATGGCTGGAGCAATCTGCTCATGAGTGAGGCCGATGGCGTCCTTTGCTCGGAATAGTTGAATTTTCAATTGATACAGGCGTTATAGGGTTACCAGTACCATCATCTTTTGCAGAGGTAAGCGTagtTCCATCTTTATTTAAGAAAGGAATCTTCAACGCCTCCCTTATGCACTTGCGCCGCCAAGATCAACGCTTTGCTTTGGAGACTCAGTAGGTTTTTCACCTTTCGATCCGTCTGCTTTACGTTTAACCCGAATGAAACGCCCAAgaGaATTATCAACTGCAAGCGCTGTGAATTTGATTTCAGGTGTAATTGCGTTGCCGGCtacaAAGTTTAGcTCTGCTTcACCAGAAGGA…
1	M109	hutI	Biological process	GCTTGCATGCCTGCAGGTCGACGATTGGGACCACCTATGATGTAGAACGGGAAAAGGACATGATGCTATGGCTGGAAGGAAAGCTGCCTGTTCCAAAGGTCCTGCACTTTGAACGGCATGATGGCTGGAGCAATCTGCTCATGAGTGAGGCCGATGGCGTCCTTTGCTCGGAAGAGTTGCATGGGGAACAAGACATTATGATACCGATGAAAAAGGAGCGGTAACATGCCGAAACAAATAGATACCATACTCACCAACATCGGCCAGCTGCTGACGATGGAATCCGGCGGCCCCCGATCCGGCGGAAGCATGCAGGATCTTCATGTCACGGAAAATGCCGTCATCGGCGTTCACGACGGGCGCATTGTTTTTGCCGGACATCAAGGAGCGGAGAAAGGA…
1	M142	yfkL	Biological process	ggtgtatacgacngccatgaattcgagctcggtacccggggatcctctagagattgggaccacctatgatgtagaacgggAAAAGGCCTTGCGATGACCGGATTCTTCATCATCCTGCTCACGTCCCTGCCGTTTATGAATCTGACGGACTCGACGTCTCTCATTTGGATTGTCGTCGTTTATACCGCGCGGCTTTTGGGAACAGCCATGATTATGATGCCGGTGACGACAGCGGGAATCAACGCCCTGCCGCGCCACTTAATTCCGCACGGCACAGCCATGAACAATACCGTCCGCCAGGTCGGCGGTTCTATCGGTACGGCGCTGCTGGTTTCCGTGATGAGCAGCCAGGCCGCGCACGCCAATGCGTCAACTCCGGCAAACGCCGCCCTGCACGGC…
1	M13	lspA	Cellular component	AATTCGAGCTCGGTACCCGGGGATCCTCTAGAGATTGGGACCACCTATGATGTAGAACGGGAAAAGGACATGATGCTATGGCTGGAAGGAAAGCTGCCTGTTCCAAAGGTCCTGCACTTTGAACGGCATGATGGCTGGAGCAATCTGCTCATGAGTGAGGCCGATGGCGTCCTTTGCTCGGAAGAGTATGAAGATGAACAAAGCCCTGAAAAGATTATCGAGCTGTATGCGGAGTGCATCAGGCTCTTTCACTCCATCGACATATCGGATTGTCCCTATACGAATAGCTTAGACAGCCGCTTAGCCGAATTGGATTACTTACTGAATAACGATCTGGCCGATGTGGATTGCGAAAACTGGGAAGAAGACACTCCATTTAAAGATCCGCGCGAGCTGTAT…
1	M135	membrane protein	Cellular component	gggttaagacngccatgcattcgagctcggtacccggggatcctctagagattgggaccacctatgatgtagaacgggaaAAGGACATGATGCTATGGCTGGAAGGAAAGCTGCCTGTTCCAAAGTCCTGCACTTTGAACGGCATGATGGCTGGAGCAATCTGCTCATGAGTGAGGCCGATGGCGTCCTTTGCTCGGAAGAGTCTCGAGGCGAACACTTATGTGTCAACCTTAAATGCGAACCTGAAAGGGCTGATTTTCTGCGTGGTCTTTTTGAAGAAATCAAGCCCGGATACCATATGAACAAGGAGCATTGGAATACGCTTACCTTAGATGAGGGACTCCCAGAGCATCAAATCCATGACATGGTAAAGTACAGCTTTGAACTGACAAAACCAAA…
1	M3	hypothetical protein	Function unknown	ATTACGCCAAGCTTGCATGCCTGCAGGTCGACGATTATTGTGGTTTCAAAATCGGCTCCTGAACCGAAAAAAGAAAAAGCAATCACCGCCGTAAAAGGGAAGGATTATCACGTATCCCTTGAACTTGACCTCAGGGGAGAGCGTTACGAAAACGCCCTCAGCCGCGTCGAAAAATATTTAGATGACGCGGTGCTCGCCGGCTATCCGAGAGTGTCCATCATTCACGGAAAAGGCACGGGCGCCCTCCGAAAAGGGGTGCAGGATCTTCTGAAAAACCACCGCAGCGTGAAAAGCTCGCGGTTCGGGGAAGCGGGAGAAGGAGGATCAGGCGTAACGATTGTCGAACTAAAATAAAAAGGGAGAAAACGTCATGAATGCTTTTTGGGAAAATGAGCTTGT…
1	M12	hypothetical protein	Function unknown	gggttacgacggccagtgaattcgagctcggtacccggggatcctctagagattgggaccacctatgatgtagaacgggaAAAGGACATGATGCTATGGCTGGAAGGAAAGCTGCCTGTTCCAAAGGTCCTGCACTTTGAACGGCATGATGGCTGGAGCAATCTGCTCATGAGTGAGGCCGATGGCGTCCTTTGCTCGGAAGAGTATGAAGATGAACAAAGCCCTGAAAAGATTATCGAGCTGTATGCGGAGTGCATCAGGCTCTTTCACTCCATCGACATATCGGATTGTCCCTATACGAATAGCTTAGACAGCCGCTTAGCCGAATTGGATTACTTACTGAATAACGATCTGGCCGATGTGGATTGCGAAAACCGGGAAGAAGACACTCCATTTAAA…
1	M48	hypothetical protein	Function unknown	TGCAGGTCGACGATTATCCCGATCTGTACTTGCCGAGCGATGATGTCACTTCGCCATTTTTGATTCCGGGACTTTTGGATGTGTTCCGTTCAAAAGGCATAAAGCGCTGCGCTTATTATGAGCCTGTCGAAGAGAAAGGCCTATTTTCACTCAATCAGACGGCGGCTTCGGATGTATGCGGACTGCTGCGGGCTGACATGATCATTGCCGATGAAAAACGGCGCGCCCCTTTTATGAGCTTATATGATTCTTTTACGACACTCTTTCTCATGGAAGAACAAGACATTCAGTCTGTCGTCCGCGCCATGAATTGGGAGTCCGTCATTTGCTCTGATACGGCCTGCATAAACTGGTATTCTCAATAAAAAAGGCTGCCGATTTGAGTTCGGCAGCCTTTTT…
1	M79	hypothetical protein	Function unknown	gcttgcatgcctgcaggtcgacgattgggaccacctatgatgtagaacgggaaaaGGACATGATGCTATGGCTGGAAGGAAAGCTGCCTGTTCCAAAGGTCCTGCACTTTGAACGGCATGATGGCTGGAGCAATCTGCTCATGAGTGAGGCCGATGGCGTCCTTTGCTCGGAAGAGTGTGAAGATGAACAAAGCCCTGAAAAGATTATCGAGCTGTATGCGGAGTGCATCAGGCTCTTTCACTCCATCGACATATCGGATTGTCCCTATACGAATAGCTTAGACAGCCGCTTAGCCGAATTGGATTACTTACTGAATAACGATCTGGCCGATGTGGATTGCGAAAACTGGGAAGAAGACACTCCATTTAAAGATCCGCGCGAGCTGTATGATTTTTTAA…
1	M88	MelAGNAT family acetyltransferase	Function unknown	GGAAAGCTGCCTGTTCCAAAGGTCCTGCACTTTGAACGGCATGATGGCTGGAGCAATCTGCTCATGAGTGAGGCCGATGGCGTCCTTTGCTCGGAAGAGTTGCGAGAAGAACATTTTTAAAAAGAGGATTCGGCATTTTGGGTGCAACTCTCGCAACGGCTTGCGGAGGTTACGGCTATGCCCGGTATATTGAACCGCGCATGATTGAGATCACCCGTCATACAATCACCAGCCGCCTGATCCCCCGCGGCTTTGACAATTTTAAAATCGTTCAATTCAGCGATACGCATCTCAGTGATGTGTTTACATCCGGTGACTTGAATAAAGCAGCGGAAAAGATCAATCAGCTGAAACCCGATCTGCTCATCTTTACGGGAGATTTAATTGATAAGCCGCATT…
1	M101	yomQ	Function unknown	ggggttttagacggccactgcattcgagctcggtacccggggatcctctagagattgggaccacctatgatgtagaacggGAAAAGGACATGATGCTATGGCTGGAAGGAAAGCTGCCTGTTCCAAAGGTCCTGCACTTTGAACGGCATGATGGCTGGAGCAATCTGCTCATGAGTGAGGCCGATGGCGTCCTTTGCTCGGAAGAGATTGGACCCGAAAATCATTAGAAACGAAAAAAATCCTTCATTCGTTCAACGATGAAGGATTTTTCGTTTTAGCGCTATCTGCTTTTTTATTAAGCTTCTTCAGCTTCAATGACGATTGAGGAATCATTGTACACCGCGGTATCGGTTTCCTTCGTCATTTTACTTGTTAACAGCCCTGCGGTCATACTGCCGC…
1	M133	hypothetical protein	Function unknown	gggttacgacngccagtgnattcgagctcggtacccggggatcctctagagattgggaccacctatgatgtagaacgggaAAAGGACATGATGCTATGGCTGGAAGGAAAGCTGCCTGTTCCAAAGGTCCTGCACTTTGAACGGCATAATGGCTGGAGCAATCTGCTCATGAGTGAGGCCGATGGCGTCCTTTGCTCGGAAGAGTTTTGTCGAACTGAATATAAAGATCACTATGGATTGTTTCAGTTTCTGGATCGTACTCTAAAGTGTGATACTCCATCTCATAAGCTTCAGAGAATGTATCAGCCTTAATTTCAACAATTTCGCCTTCAGCATCAATTTTATATCGTGCTTTAACTTTCGCACCCTCTTTTGCAAAAGTTGTAGGGAGTTGACCTT…
1	M5	yhfE	Molecular function	ggggggtaagacggccagtgaattcgagctcggtacccggggatcctctagagattgggaccacctatgatgtagaacggGAAAAGGACATGATGCTATGGCTGGAAGGAAAGCTGCCTGTTCCAAAGGTCCTGCACTTTGAACGGCATGATGGCTGGAGCAATCTGCTCATGAGTGAGGCCGATGGCGTCCTTTGCTCGGAAGAGTATGAAGATGAACAAAGCCCTGAAAAGATTATCGAGCTGTATGCGGAGTGCATCAGGCTCTTTCACTCCATCGACATATCGGATTGTCCCTATA
1	M51	pyrP	Molecular function	AAGCTTGCATGCCTGCAGGTCGACGATTGGGACCACCTATGATGTAGAACGGGAAAAGGACATGATGCTATGGCTGGAAGGAAAGCTGCCTGTTCCAAAGGTCCTGCACTTTGAACGGCATGATGGCTGGAGCAATCTGCTCATGAGTGAGGCCGATGGCGTCCTTTGCTCGGAAGAGTAGTGAGCCGAACATGGCGAATAAATGCTGCAGGCTGAATGGCAGCCAGGACAATGGATTGGGGACGTCCCTGACTCCCAGGTTTACTTTTTTCTTACTCATGGCGTTTTCCTCCCGGGTGACTTTCAAATGGTATAAAAAAACCTCTTTGCTTTTTGCGCAAAGAGGCATACAAAACCCGGCCGCGTCGATCCGCCCGGCTTTGTGTTTTAAAATCCTCT…
1	M71	yhdT2	Molecular function	gcttgcatgcctgcaggtcgacgattgggaccacctatgatgtagaacgggaaaaGGACATGATGCTATGGCTGGAAGGAAAGCTGCCTGTTCCAAAGGTCCTGCACTTTGAACGGCATGATGGCTGGAGCAATCTGCTCATGAGTGAGGCCGATGGCGTCCTTTGCTCGGAAGAGTGTGAAGATGAACAAAGCCCTGAAAAGATTATCGAGCTGTATGCGGAGTGCATCAGGCTCTTTCACTCCATCGACATATCGGATTGTCCCTATACGAATAGCTTAGACAGCCGCTTAGCCGAATTGGATTACTTACTGAATAACGATCTGGCCGATGTGGATTGCGAAAACTGGGAAGAAGACACTCCATTTAAAGATCCGCGCGAGCTGTATGATTTTTTAA…
1	M78	dfnG	Molecular function	cggggtacgacggccgtgcattcgagctcggtacccggggatcctctacagattgggaccacctatgatgtagaacgcgataaagacATGATGCTATGGCTGGAAGGAAAGCTGCCTGTTCCAAAGATCCTGCACTTTGAACGGCATGATGGCTGGAGCAATCTGCTCATGAGTGAGGCCGATGGCGTCCTTTGCTCGGAAGAGGATGAGAAGGAACTGGCGGCGGGGCTTTTGAAAATAGACAAGAACAGACTGACGGATGCTGACAATCTGGCTGATTTCGGCTTTGATTCTATCAGTTTGGCGGAATTCGCCTCTTCTTTGTCCGCTCACTACGGAATTGAAGTGACCCCCGCCCTGTTTTTCGGGCATTCCACACTGGAGAAGGTCGTCCGCTAT…
1	M108	parE	Molecular function	CAGTGaaTTCGAGCTCGGTACCCGGGGATCCTCTAGAGATTAGCAGGGTACGGATGTGCGAGCCGTCAACATCAGCGTCGGTCATGATGATGATCTTGTCATAGTTGATGTCCTCTATATCAAAATCTGCGCCGACTCCTCCGCCGATCGCATGAATAAACGTATTGATTTCTTCATTTTTGAAGATGTCTGCTAGCTTTGCTTTCTCTGTGTTGATGACCTTTCCGCGAAGGGGCAGCACGGCTTGGAATTTCCGGTCTCTTCCCTGTTTTGCAGAACCTCCAGCAGAGTCTCCCTCCACCAGATACAATTCATTCTTCGCCGGATTTCTGGAACCGGCCGGTGTAAGTTTTCCGCTCAGCGTCGCTTCTGATTTTTTGCGCTTTTTGCCGCTTCTCG…
1	M112	yqiR	Molecular function	ggggtacgacggccantgaattcgagctcggtacccggggatcctctagagattgggaccacctatgatgtagaacgggaAAAGGACATGATGCTATGGCTGGAAGGAAAGCTGCCTGTTCCAAAGGTCCTGCACTTTGAACGGCATGATGGCTGGAGCAATCTGCTCATGAGTGAGGCCGATGGCGTCCTTTGCTCGGAAGAGCTGAGATTGGAACAGAATTCACTTTCAGCACTGCTCCGTTTGAGATGTTGATGTTAACATCCGAAGCACCGGTATAATTCTCATAGTTGTACGTATATGTGCCGTCGGCATTTTCAGTGATCGGCGGGACATCTGAATTCGTTCCGTTAAACAGATAACGTCCGTTTACCTGAGTATTCGCGACAGAAACGAGCT…
1	M120	membrane prote in RsbT co-antagonist protein rsbRD	Molecular function	gaacacgccagtgaattcgagctcggtacccggggatcctctagagattgggaccacctatgatgtagaacgggaaaaggACATGATGCTATGGCTGGAAGGAAAGCTGCCTGTTCCAAAGGTCCTGCACTTTGAACGGCATGATGGCTGGAGCAATCTGCTCATGAGTGAGGCCGATGGCGTCCTTTGCTCGGAAGAGTTGGAGGGTGAACAAGTCGATACACTGGGGGGCTGGTTTCTTACTCAGCATATTGACGCGAAGCCCGGGAGCACCATTGATTTTGAAGGCTACACATTTACGGTAAAAGAAATCGACAGCCATCATATCATGACGATTGAAGCTGACAAAGCTGAATAGCCTGAGGGAGAAATCCCTCCCGGCCATTCAGCTTTTTATCA…
1	M124	DeoR family transcriptional regulator	Molecular function	cagtgattcgagctcggtacccggggatcctctagagattgggaccacctatgatgtagaacgggAAAAGGACATGATGCTATGGCTGGAAGGAAAGCTGCCTGTTCCAAAGGTCCTGCACTTTGAACGGCATGATGGCTGAAGCAATCTGCTCATGAGTGAGGCCGATGGCGTCCTTTGCTCGGAAGAGACTGGTCCGGAACGGGTGTTGTAAAGCCGGCTTCAATGTGCACGCCGTTCACCCCGAGAAAGCTTTTGTCAAAACGGTACTGGCTGACCGCCGTTAATGAGGCGCCGCCGATCATCGCACCTGTTCTATGCTTCACATATCCTCCGAGAAGATAAAAAGGAATTCCCTTCCTTATTAAAGCATCGATATGCATAACCCCGTTTGTGACA…
1	M125	yjiB	Molecular function	aaattttacatgattacgccaagcttgcatgcctgcaggtcgacgattgggaccacctatgatgtagaacgggaaaaggaCATGATGCTATGGCTGGAAGGAAAGCTGCCTGTTCCAAAGGTCCTGCACTTTGAACGGCATGATGGCTGGAGCAATCTGCTCATGAGTGAGGCCGATGGCGTCCTTTGCTCGGAAGAGTAGCGGAGGAACATACGGTAAAACTTTTAAGCCACACTTCTGGTGACAATTTCTGCAGGTTTTAGAAATGACAAAAATAGAAGGTCCGGGAGTCAAGCAGGGAGATATCTTGACCAGGTGTTGTTGGATAAGCCGAATGTATATCGATTGGAAAGCAATTCATTTTATTGAAGGAAAAAGGACCGGAGTCATCCAGTCCTT…
1	M143	YsnB	Molecular function	aaaaaatgtactgtattcgccaagcttgcatgcctgcaggtcgacgattgggaccacctatgatgtagaacgggaaaaggACATGATGCTATGGCTGGAAGGAAAGCTGCCTGTTCCAAAGGTCCTGCACTTTGAACGGCATGATGGCTGGAGCAATCTGCTCATGAGTGAGGCCGATGGCGTCCTTTGCTCGGAAGAGTTGCGAGAAGAACATTTTTAAAAAGAGGATTCGGCATTTTGGGTGCAACTCTCGCAACGGCTTGCGGAGGTTACGGCTATGCCCGGTATATTGAACCGCGCATGATTGAGATCACCCGTCATACAATCACCAGCCGCCTGATCCCCCGCGGCTTTGACAATTTTAAAATCGTTCAATTCAGCGATACGCATCTCAGTGAT…
1	M70	not detected	Undefined
2	M15	yunB	Biological process	TTCGAGCTCGGTACCCGGGGATCCTCTAGAGATTGGGACCACCTATGATGTAGAACGGAAAAGTCACAACGATGGATTTTAATACACAAATGGTCAACAGCATGAAGGCGAAAGTGACAAAGCAGCTTCAGGCTCATTTGAAGGAAGCGGAGTCGAACAATAAGCAGCATGAAACAGAAAAAGGCGCGAAAACGGCCGATGAAATTATGATTAACATCCCTTTAGGGCAGGTCACGGGTAACAGCATTCTCGGAAATCTGGGGCCAAGAATCCCCGTGCGCTTTAACCTGATCGGTGATGCATTAACCGATGTGAAAACAAAAATAAAGCCGTACGGCATTAACAATGCCCTGATCGATATCAGTATTTTTGTGGAGATTAAAGTGAAGGTCATTATTC…
2	M57	yclN	Biological process	attttaacaggattacgcctagcttgcatgcctgcaggtcgacgattgggaccacctatgatgtagaacgggaaaaggacATGATGCTATGGCTGGAAGGAAAGCTGCCTGTTCCAAAGGTCCTGCACTTTGAACGGCATGATGGCTGGAGCAATCTGCTCATGAGTGAGGCCGATGGCGTCCTTTGCTCGGAAGAGTATGAAGATGAACAAAGCCCTGAAAAGATTATCGAGCTGTATGCGGAGTGCATCAGGCTCTTTCACTCCATCGACATATCGGATTGTCCCTATACGAATAGCTTAGACAGCCGCTTAGCCGAATTGGATTACTTACTGAATAACGATCTGGCCGATGTGGATTGCGAAAACTGGGAAGAAGACACTCCATTTAAAGATCCGC…
2	M59	comQ	Biological process	CTTTTTAGACATCTAATCTTTTCTGAAGTACATCCGCAACTGTCCATACTCTGATGTTTTATATCTTTTCTAAAAGTTCGCTAGATAGGGGTCCCGAGCGCCTACGAGGAATTTGTATCGGGGTATAGATCTAAAACGAATTTTAACAAAAAAATGTGTTTTTCTTTGTTAGACCGGGGACTTATCAGCCAACCTGTTACTAGTGATTGATGATCATCCGGCTGTCATGGAGGGCACCAAGACGATTCTGGAAACGGACACGAATCTTTCTGTCGATTGCCTCAGTCCTGATGCCAGTGAACAATTCGTTCTCCGGCATGATTTTTCAGCTTACGATCTCATATTAATGGATTTAAATCTGGGTGATGACATCAGCGGCATAGAGCTTTCCAAGAAAAT…
2	M82	tasA	Cellular component	TACGACGCAGTGATTCGAGCTCGGTACCCGGGGATCCTCTAGAGATTGGGACCACCTATGATGTAGAACGGGAAAAGGACATGATGCTATGGCTGGAAGGAAAGCTGCCTGTTCCAAAGG TCCTGCACTTTGAACGGCATGATGGCTGGAGCAATCTGCTCATGAGTGAGGCCGATGGCGTCCTTTGCTCGGAAGAGTATGAAGATGAACAAAGCCCTGAAAAGATTATCGAGCTGTATG CGGAGTGCATCAGGCTCTTTCACTCCATCGACATATCGGATTGTCCCTATACGAATAGCTTAGACAGCCGCTTAGCCGAATTGGATTACTTACTGAATAACGTTCTGGCCAAGTTTTTCC GATTGATTAATGAATTGATAAAAGATGACTTTCCTA…
2	M52	hypothetical protein	Function unknown	cggggtacgacggccgtgcattcgagctcggtacccggggatcctctacagattgggaccacctatgatgtagaacgcgataaagacATGATGCTATGGCTGGAAGGAAAGCTGCCTGTTCCAAAGATCCTGCACTTTGAACGGCATGATGGCTGGAGCAATCTGCTCATGAGTGAGGCCGATGGCGTCCTTTGCTCGGAAGAGGATGAGAAGGAACTGGCGGCGGGGCTTTTGAAAATAGACAAGAACAGACTGACGGATGCTGACAATCTGGCTGATTTCGGCTTTGATTCTATCAGTTTGGCGGAATTCGCCTCTTCTTTGTCCGCTCACTACGGAATTGAAGTGACCCCCGCCCTGTTTTTCGGGCATTCCACACTGGAGAAGGTCGTCCGCTAT…
2	M74	yhxC	Molecular function	gggggttagacggccagtgnattcgagctcggtacccggggatcctctagagattgggaccacctatgatgtagaacgggAAAAGGACATGATGCTATGGCTGGAGGGAAAGCTGCCTGTTCCAAAGGTCCTGCACTTTGAACGGCATGATGGCTGGAGCAATCTGCTCATGAGTGAGGCCGATGGCGTCCTTTGCTCGGAAGAGACGGAAGCTGAACAAAGAATATTTCGGCTCCGCTTCTGAATTTCAAAAAGGCGAAAAGAAAAACGTCGAGGGCAAAAAAATGCATGTCGAACATAAAGGGTCTTTGCGGGACACGCTGGTTGAAATGGAGCAGGATCTGCAATCTTCCATCTCTTACGCCGGCGGCAATACACTCGAAGCCATCCGTAATGTCG…
2	M77	guaC	Molecular function	ATTACGCCAAGCTTGCATGCCTGCAGGTCGACGATTATTGTGGTTTCAAAATCGGCTCCTGAACCGAAAAAAGAAAAAGCAATCACCGCCGTAAAAGGGAAGGATTATCACGTATCCCTTGAACTTGACCTCAGGGGAGAGCGTTACGAAAACGCCCTCAGCCGCGTCGAAAAATATTTAGATGACGCGGTGCTCGCCGGCTATCCGAGAGTGTCCATCATTCACGGAAAAGGCACGGGCGCCCTCCGAAAAGGGGTGCAGGATCTTCTGAAAAACCACCGCAGCGTGAAAAGCTCGCGGTTCGGGGAAGCGGGAGAAGGAGGATCAGGCGTAACGATTGTCGAACTAAAATAAAAAGGGAGAAAACGTCATGAATGCTTTTTGGGAAAATGAGCTTGT…
2	M122	yknZ	Molecular function	gggggttacgacngncagtgattcgagctcggtacccggggatcctctagagattgggaccacctatgatgtagaacgggAAAAGGACATGATGCTATGGCTGGAAGGAAAGCTGCCTGTTCCAAAGGTCCTGCACTTTGAACGGCATGATGGCTGAAGCAATCTGCTCATGAGTGAGGCCGATGGCGTCCTTTGCTCGGAAGAGACTGGTCCGGAACGGGTGTTGTAAAGCCGGCTTCAATGTGCACGCCGTTCACCCCGAGAAAGCTTTTGTCAAAACGGTACTGGCTGACCGCCGTT AATGAGGCGCCGCCGATCATCGCACCTGTTCTATGCTTCACATATCCTCCGAGAAGATAAAAAGGAATTCCCTTCCTTATTAAAGCATCGATATGCAT…
2	M132	RpiR family transcriptional regulator	Molecular function	aatttgaacatgattacgccaagcttgcatgcctgcaggtcgacgattgggaccacctatgatgtagaacgggaaaaggaCATGATGCTATGGCTGGAAGGAAAGCTGCCTGTTCCAAAGGTCCTGCACTTCGAACGGCATGATGGCTGGAGCAATCTGCTCATGAGTGAGGCCGATGGCGTCCTTTGCTCGGAAGAGTATGAAGATGAACAAAGCCCTGAAAAGATTATCGAGCTGTATGCGGAGTGCATCAGGCTCTTTCACTCCATCGACATATCGAATTGTCCCTATACGAATAGCTTAGACAGCCGCTTAGCCGAATTGGATTACTTACTGAATAACGATCTGGCCGATGTGGATTGCGAAAACTGGGAAGAAGACACTCCATTTAAAGATCCG…
2	M134	MFS transporter	Molecular function	ggggtacgacggccagtgnattcgagctcggtacccggggatcctctagagattgggaccacctatgatgtagaacgggaAAAGGACATGATGCTATGGCTGGAAGGAAAGCTGCCTGTTCCAAAGGTCCTGCACTTTGAACGGCATGATGGCTGGAGCAATCTGCTCATGAGTGAGGCCGATGGCGTCCTTTGCTCGGAAGAGTCGTGCGGGGAACGGTTTCGGATTTCTGCTCGGGGCTCCGCTGAATGTGCTTGTATCAGAAACGGCGGGCCAAAACAAAGGAACAGCGCTCGGCACGCTGTCACTCGTAAGGCAGGTCGGGCTGACGCTCGCTCCGGCTTTATATGCCGGCTTCATTACAGCGGGCTTTGACCGGATCGGAGAGGACATTAAAAA…
2	M37	not detected	Undefined
3	M21	pksL	Biological process	CGACGGCAGTGATTCGAGCTCGGTACCCGGGGATCCTCTAGAGATTGGGACCACCTATGATGTAGAACGGGAAAAGGACATGACGCTATGGCTGGAAGGAAAGCCGCCTGTTCCAAAGGTCCTGCACTTTGAACGGCATGATGGCTGGAGCAATCTGCTCATGAGTGAGGCCGATGGCGTCCTTTGCTCGGAAGAGGCCGGGGTCGAACACCTGACATGTTTGATACATTTTCATGAAGGAGCGGATGCAGCATGCCTGCCCTTTTTTGCGGCAGCGATTCTCTTTTCTCCGCCTTCGGCACCCAATGCCGGATTTTTTCAAACGGATATGTCGGCAGGCTGATCCGATTCGGTTTGTTTTCACCGTACAAGAGATTCCAATCCACCGTTCCTCCGCCA…
3	M66	Maltose transport system permease	Biological process	CGCACAGATGCGTagcGTAAGGAGAAAATACCGCATCAGGCGCCATTCGCCATTCAGGCTGCGCAACTGTTGGGAAGGGCGATCGGTGCGGGCCTCTTCGCTATTACGCCAGCTGGCGAAAGGGGGATGTGCTGCAAGGCGATTAAGTTGGGTAACGCCAGGGTTTTCCCAGTCACGACGTTGTAAAACGACGGCCAGTGAATTCGAGCTCGGTACCCGGGGATCCTCTAGAGATTGGCAGCTGGCGGTTTATTGTTCCCTGACCGCCCGGGCGGCCCTGTTCTTCTTTGAGTTCAAGCTGTTTAATAAACCGGCCGTCCATTTCTAATATGAGGGCAGTGTATCCCCCGATTTGTATCGACTCACCCGCACAGATGTCAATATTCCGTTTCAGCACAA…
3	M116	yclQ	Biological process	aaaaaattaacatgaatacgccaagcttgcatgcctgcaggtcgacgattgggaccacctatgatgtagaacgggaaaagGCCTTGCGATGACCGGATTCTTCATCATCCTGCTCACGTCCCTGCCGTTTATGAATCTGACGGACTCGACGTCTCTCATTTGGATTGTCGTCGTTTATACCGCGCGGCTTTTGGGAACAGCCATGATTATGATGCCGGTGACGACAGCGGGAATCAACGCCCTGCCGCGCCACTTAATTCCGCACGGCACAGCCATGAACAATACCGTCCGCCAAGTCGGCGGTTCTATCGGTACGGCGCTGCTGGTTTCCGTGATGAGCAGCCAGGCCGCGCACGCCAATGCGTCAACTCCGGCAAACGCCGCCCCGCACGGCATGAA…
3	M22	yshE	Cellular component	CATATTACTCATCTGATCTGGCCGCAAGCTGCCTGTTCCAGGTCCTGCACTTTGCACGGCTTTATGTCTGGGGCCTTTTGGACGTGATTCATTAGAAGGCGAAAACGCCCTCCTCCTTATCAACCTGATTAAGATGACGGCCTATTTCGACTGCTTCCAAAGGGGGCCTCTCGTTCATGGAAACGGCTGGGCGCCCTCCGAAAAGGGGTGCAGGATCTTCTGAAAAACCCCCGTATGAGGGAAAGCTATTCTTTCGGGGAAGCGGGAGAAGGAGGATCCAGGATATTCATTGTGTCGTAAAATCCATGAGGTGAAAGCCCCTTGTTTGCTCTGAGGGAAACTGCATTTGTTGAAATTCTGAATAAAAAAGGTGGCCGATTTTTGTTCCGCGGCCTTTTT…
3	M45	SwrA	Cellular component	TTTTATATTTTACTGGATGATTGTTTTAGTACCTAGATTTAGATGTCTAAAAAGCTTTAACTACAAGCTTTTTAGACGTCTAATCTTTTCTGAAGTACATCCGCAACTGTCCATACTCTGATGTTTTATATCTTTTCTAAAAGTTCGCTAGATAGGGGTCCCGAGCGCCTACGAGGAATTTGTATCGGGGTATAGATCTAAAACGAATTTTAACAAAAAAATGTGTTTTTCTTTGTTAGACCGGGGACTTATCAGCCAACCTGTTAAGTCTTCTTATGCTGTTCAGCAGATACCTGGTCAATTACACAAATGTTGAATGCGTTCACGAAATCAATGAAGAGTGTGCGAAGCATTATTTCACTTACTTAATGAAAAACCATAAACGTTTAGGAATCAATC…
3	M117	hypothetical protein	Function unknown	gggttacgacngccagtgnattcgagctcggtacccggggatcctctagagattgggaccacctatgatgtagaacgggaAAAGGACATGATGCTATGGCTGGAAGGAAAGCTGCCTGTTCCAAAGGTCCTGCACTTTGAACGGCATAATGGCTGGAGCAATCTGCTCATGAGTGAGGCCGATGGCGTCCTTTGCTCGGAAGAGTTTTGTCGAACTGAATATAAAGATCACTATGGATTGTTTCAGTTTCTGGATCGTACTCTAAAGTGTGATACTCCATCTCATAAGCTTCAGAGAATGTATCAGCCTTAATTTCAACAATTTCGCCTTCAGCATCAATTTTATATCGTGCTTTAACTTTCGCACCCTCTTTTGCAAAAGTTGTAGGGAGTTGACCTT…
3	M11	adhA	Molecular function	ACGCCAAGCTTGCATGCCTGCAGGTCGACGATTATTGTGGTTTCAAAATCGGCTCCAAATTCAAGCGCTTCGTCTTTTTTGTTCATTGAGCGGCTGAGGACGGTGACCTCTGCGCCTAAAGCGTGCGCGAATTGAACGGCTAAATGTCCGAGCCCGCCCATTCCGACAATCGCCACTTTTTTGCCGGGACCGGCATTCCAGTGTTTCAGCGGAGAATAGGTGGTAATGCCCGCGCACAATAGCGGACTGGCAGCATCCAAATCCAGCTGATCGGGAATACGGACAACGAATCTGTCAGTGACAACTATTTTCTGGCTGTAGCCTCCGTACGTAGGGTTTCCGTCGTAGTCCAGGTTATTATAGGTCTGAACAACGCCTTTTGTGCAATATTGTTCGTCT…
3	M28	gyrB	Molecular function	TGaaTTCGAGCTCGGTACCCGGGGATCCTCTAGAGATTGAAGTCATCATGACCGTTCTGCACGCAGGGGGGAAGTTCGACGGAAGCGGATATAAAGTATCCGGCGGTCTTCACGGTGTAGGGGCATCCGTCGTAAACGCCTTGTCGACCACTCTTGACGTTACGGTTCATCGTGACGGAAAAATCCATTATCAGGCGTACGAGCGCGGTGTACCTGTGGCCGATCTTGAAGTGATCGGCGAAACTGATAAGACCGGAACGATTACGCACTTCGTTCCGGACCCGGAAATTTTCAAAGAAACAACTGTATATGACTATGATCTGCTTTCAAACCGTGTCCGGGAATTGGCCTTCCTGACAAAAGGCGTAAACATCACGATTGAAGACAAACGTGAAGGAC…
3	M29	yeaC	Molecular function	ACGACGCAGTGATTCGAGCTCGGTACCCGGGGATCCTCTAGAGATTGGGACCACCTATGATGTAGAACGGCAAAAGGGCGTGTGCTGCTGGAAGACGTGCCGGGAGTTGGAAAAACGATGATGGTCCGCGCTTTGGCCAAGCTGATCGGGGCTGACTTTAAGAGGACTCAGTTCACGCCGGATCTTCTGCCGTCAGACGTGACGGGTGTCTCTATTTATAATACGAAAACGATGGAATTTGAATACCGCCCGGGACCGATCATGGGGAATATCGTGCTGGCTGATGAAATTAACAGAACCTCTCCGAAAACGCAGTCTTCCCTGCTTGAGGCGATGGAGGAAGGGAATGTCACGATTGACGGAAAGACAATGCGGCTGGCTGAGCCGTTTTTCGTCATG…
3	M80	yqiG	Molecular function	cagtgaattcgagctcggtacccggggatccaggttagggcccatgattacccccaaggttctctagagattgggaccacctatgatgtagaacggAAGCTTGGGCGTTGCCTCTGCCGCACTCGGTTTAGCATTAGTAGGAGGAGGCACATGGGCCGCATTTAATGATGTGAAGTCGACGGACGCTACATTTGCGTCAGGAACACTTGATTTATCGGCTAAAGAACAATCAGCCAATGTCAATTTGTCAAACTTAAAACCAGGTGATAAATTGACGAAAGATTTTGAATTCAGAAACAACGGTTCACTTGCCATTAAAGAAGTGCTGATGGCTTTGAATTTTACTGACTTTAAAGGAGCAAAGAAAGGCAATGAATCTGCGGAGGATTTCCTCAGCCA…
Note:Mutants in bold-type letters were selected for consortia building (see text).
