# Supplementary figures and images for: Engineering multifunctional rhizosphere probiotics using consortia of Bacillus amyloliquefaciens transposon insertion mutants
Source: eLife journal article supplement (doi:10.7554/elife.90726), 2023-09-14

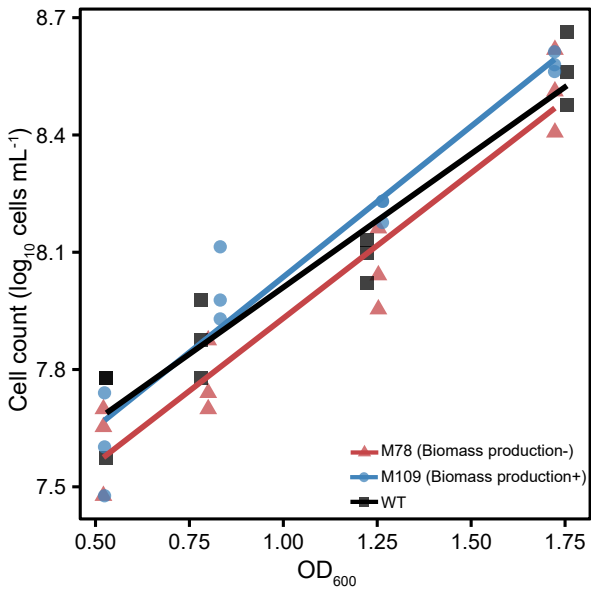

Supplement: supp [file elife-90726-supp-v1.zip]

**A**

## Root colonization

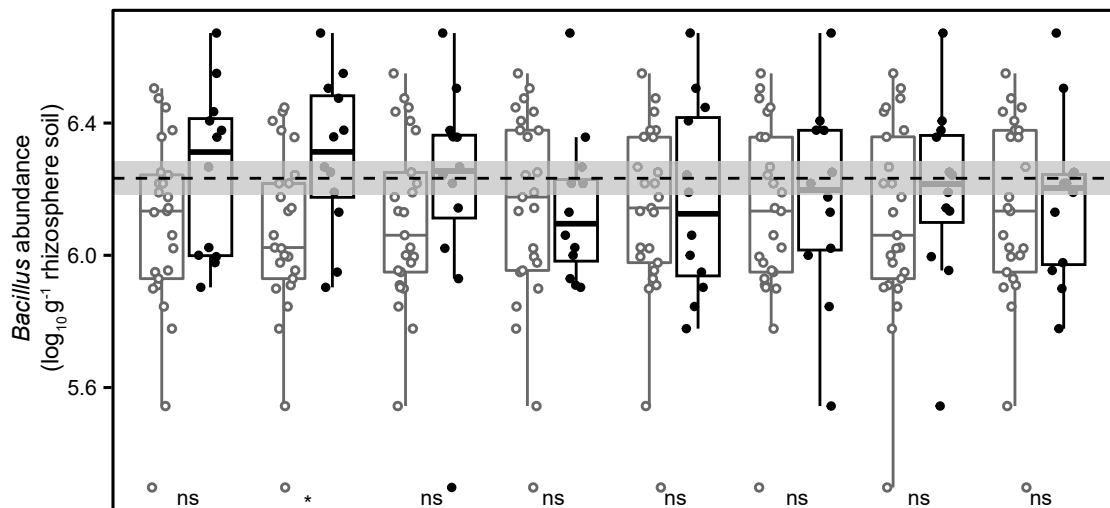**B**

## Plant protection

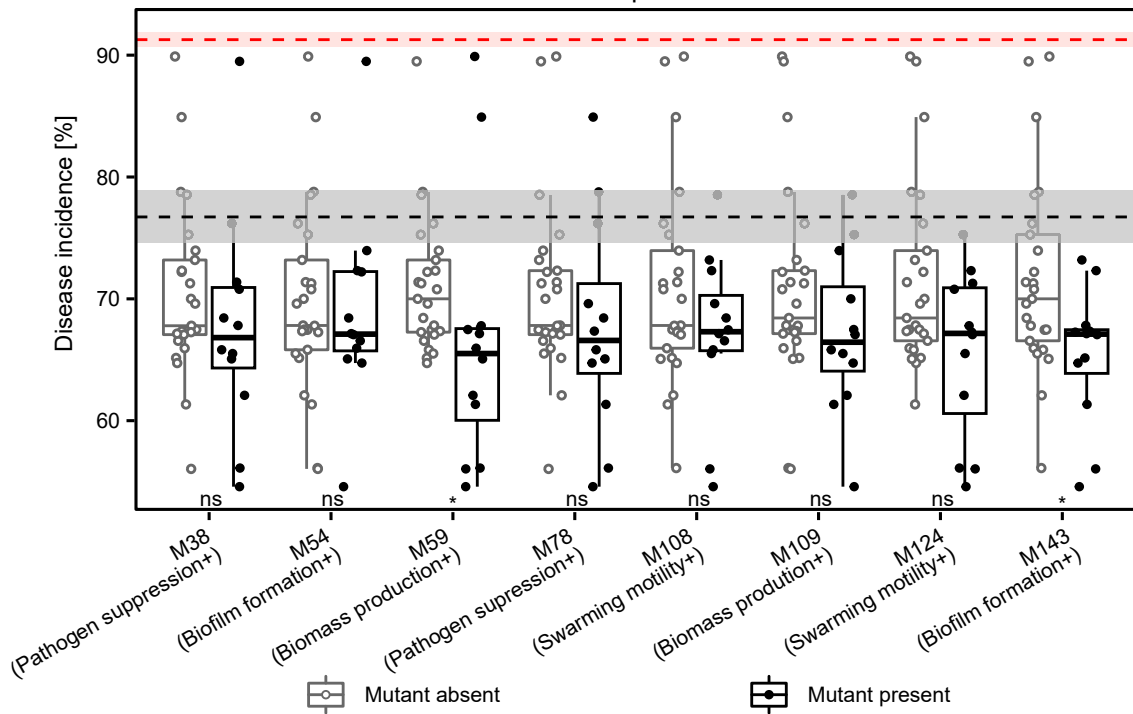

Supplement: supp [file elife-90726-supp-v1.zip]

A

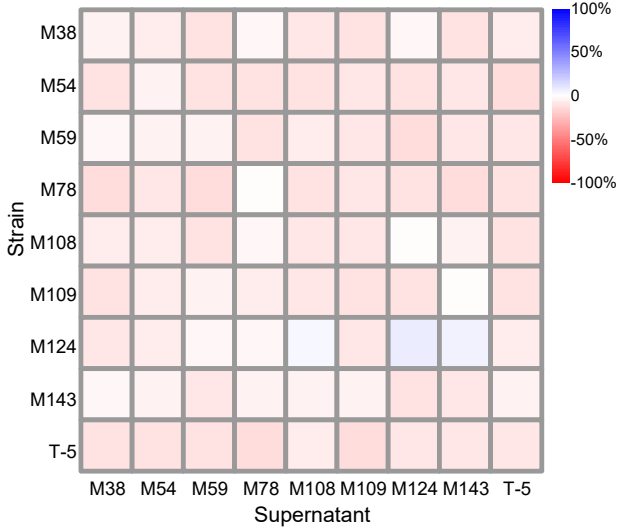

B

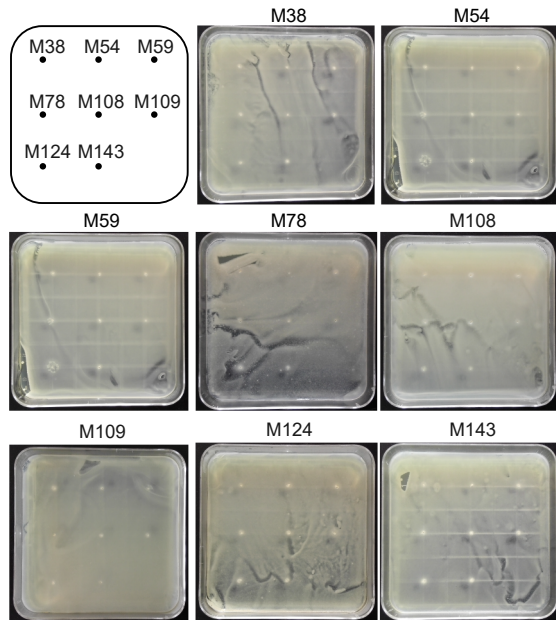

Supplement: supp [file elife-90726-supp-v1.zip]

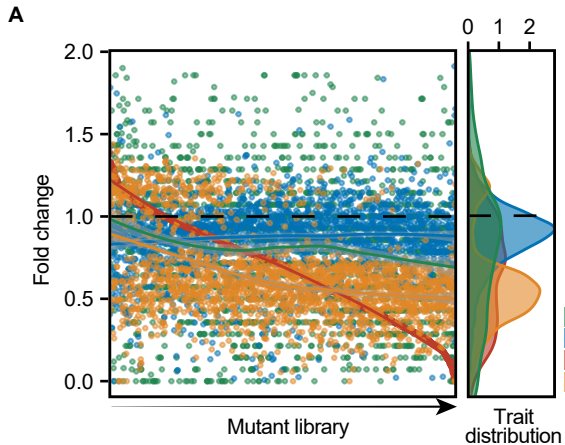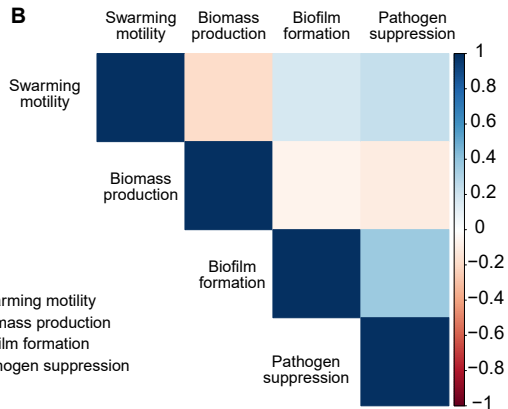

Supplement: supp [file elife-90726-supp-v1.zip]

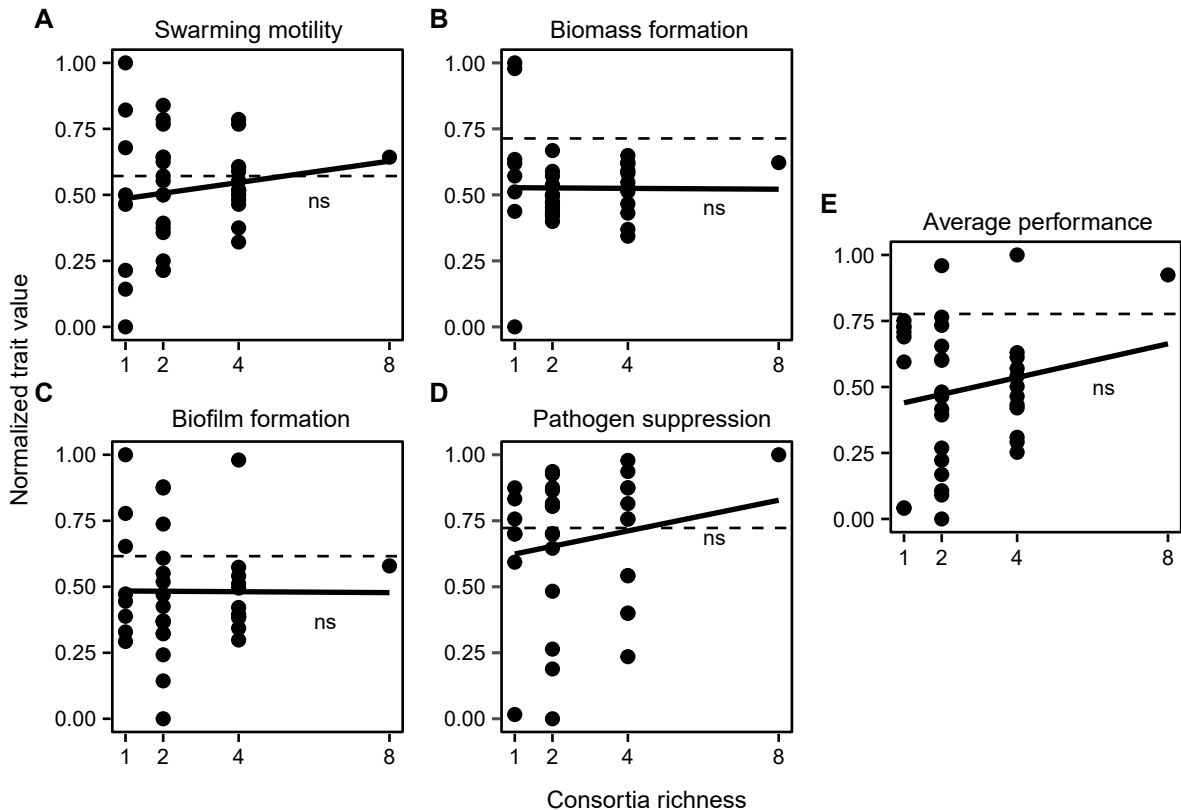

Supplement: supp [file elife-90726-supp-v1.zip]

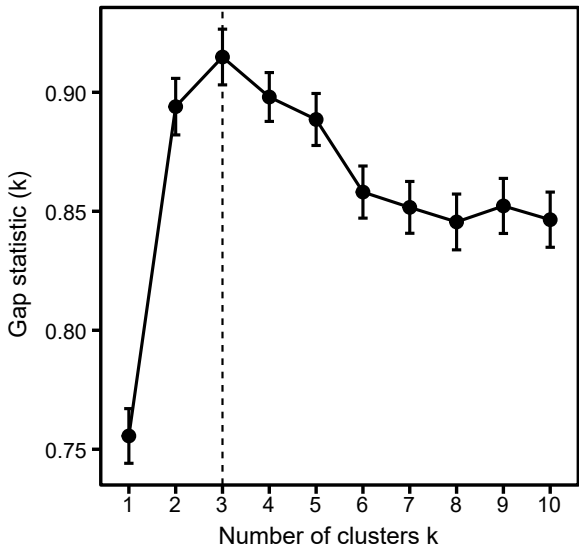

Supplement: supp [file elife-90726-supp-v1.zip]

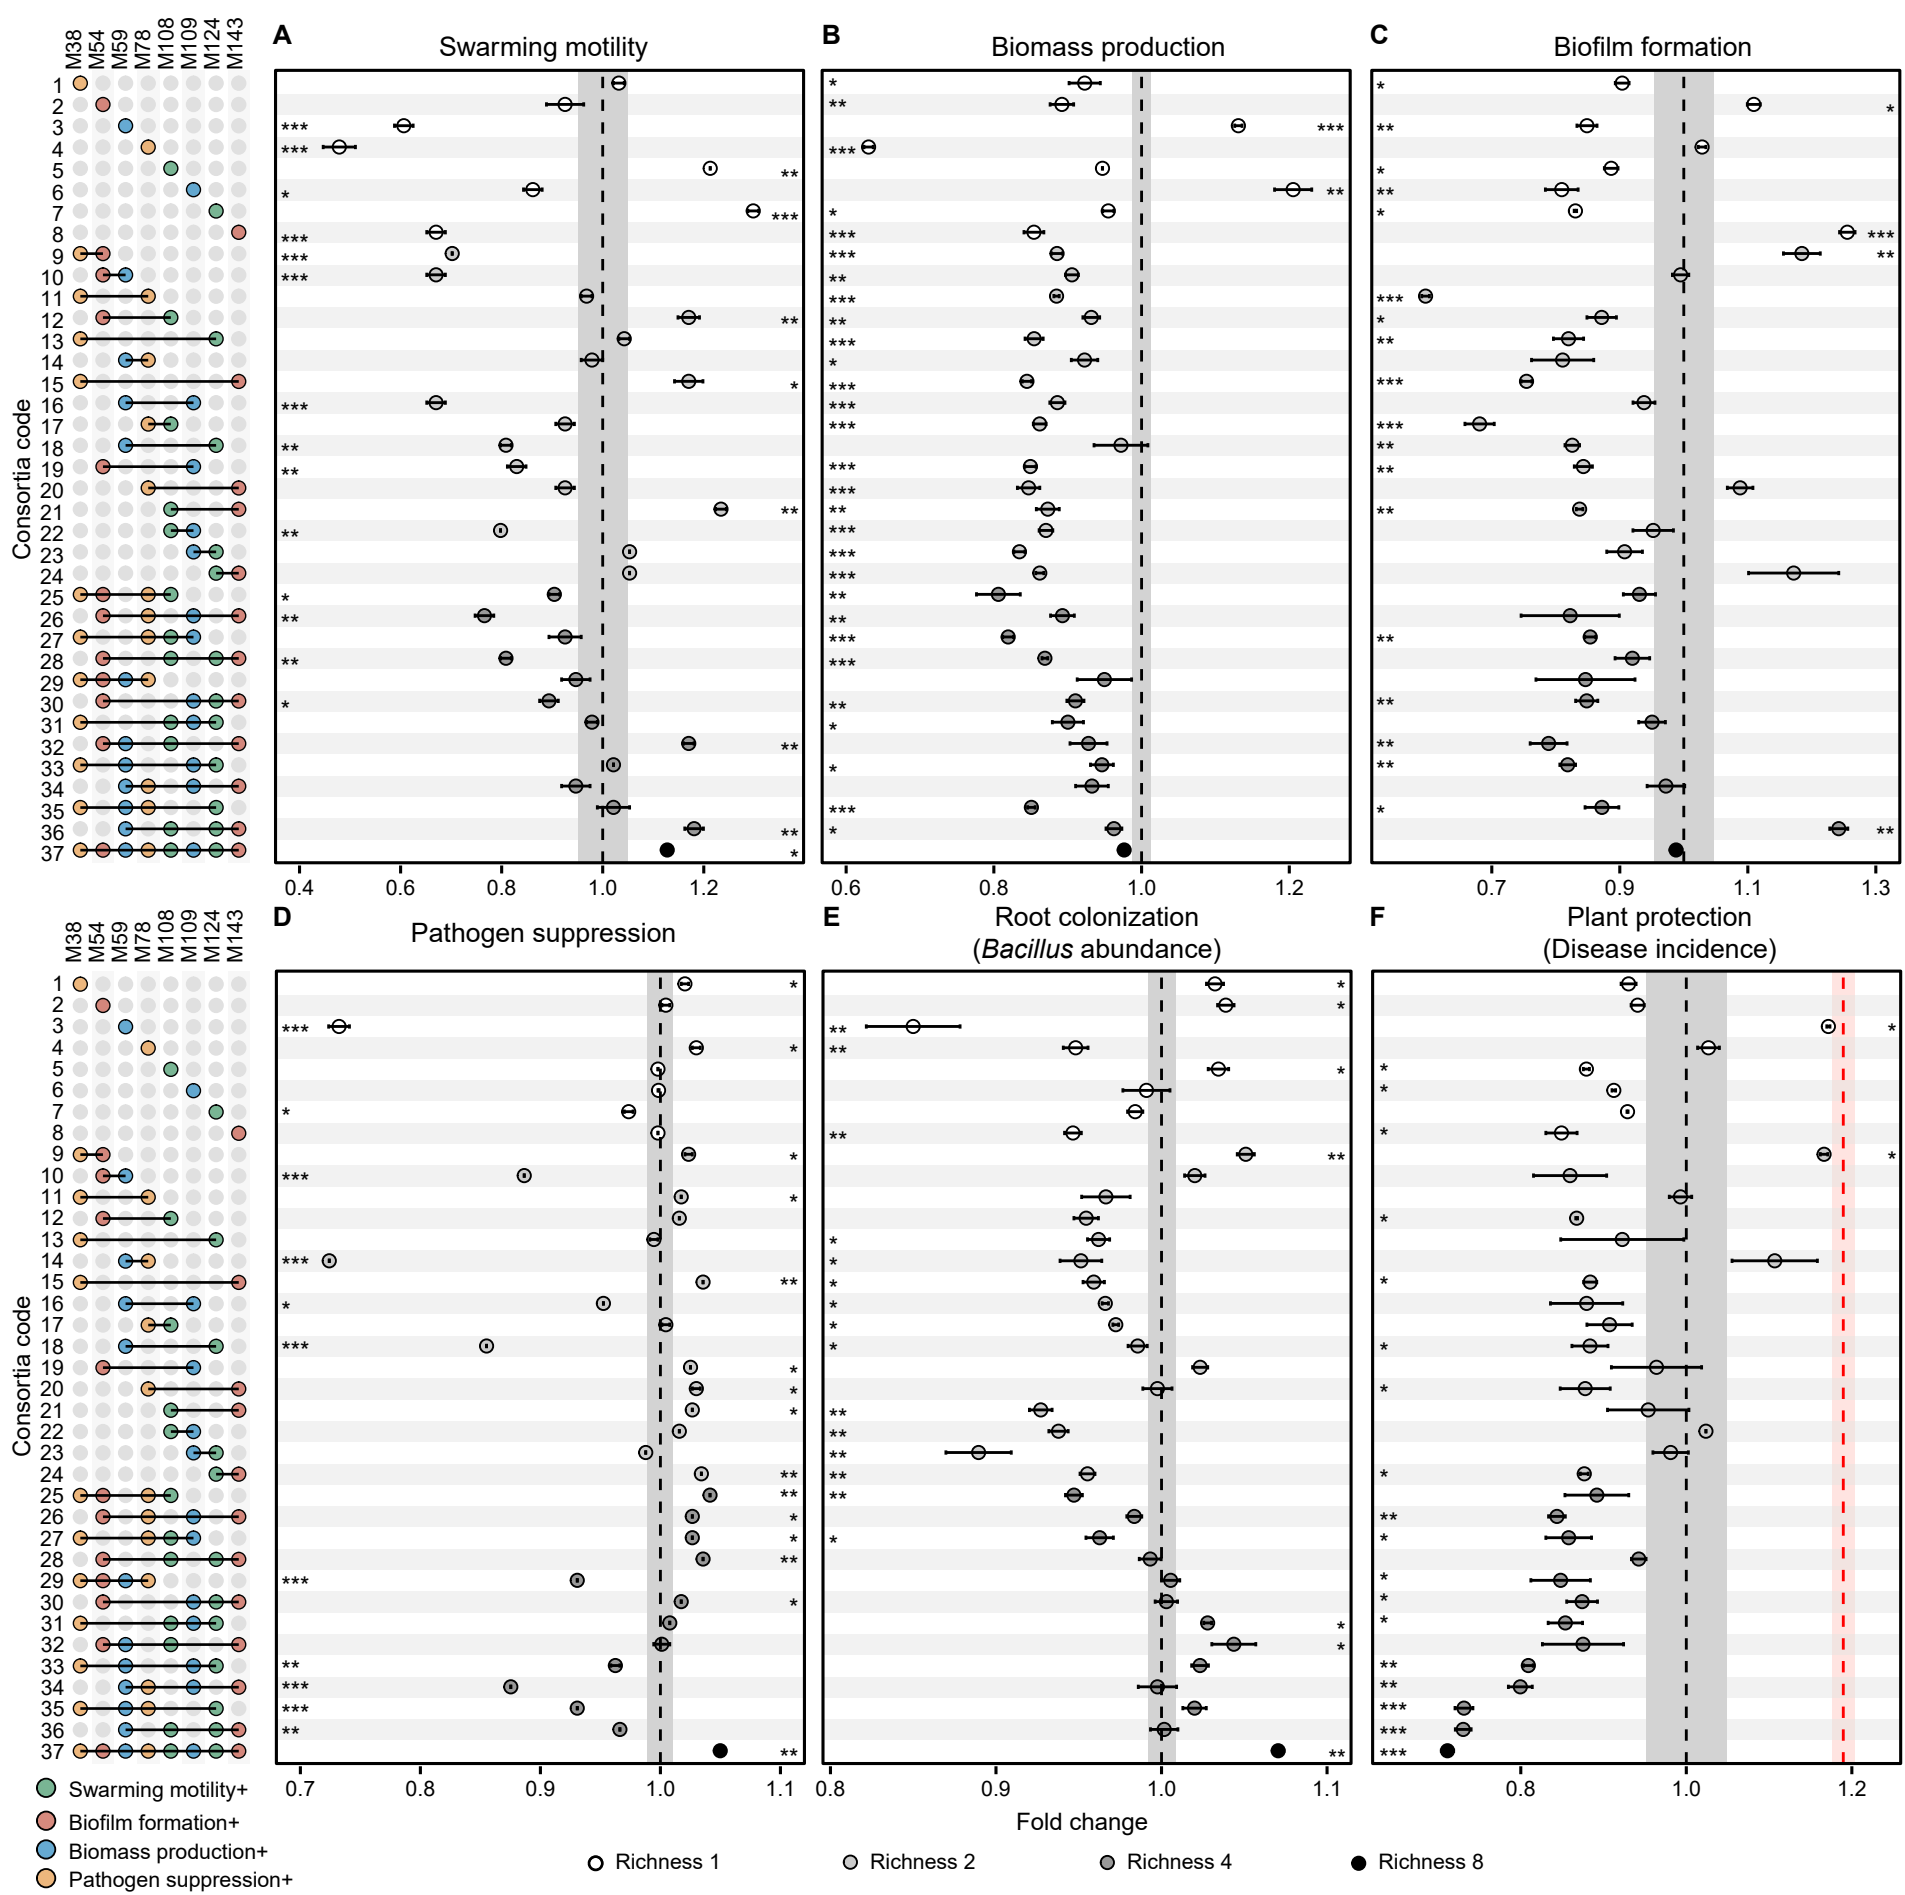

Supplement: supp [file elife-90726-supp-v1.zip]
